# Supplementary material for: Lutein Isomers: Preparation, Separation, Structure Elucidation, and Occurrence in 20 Medicinal Plants
Source: MDPI journal article supplement (doi:10.3390/molecules28031187), 2023-01-25
Supplement: s1 [file s1]

## Supplementary materials

# Lutein isomers: preparation, separation, structure elucidation and occurrence in twenty medicinal plants

Veronika Nagy <sup>1</sup>, Attila Agócs <sup>1</sup>, Viktória Lilla Balázs <sup>2</sup>, Dragica Purger <sup>2</sup>, Rita Filep<sup>2</sup>, Viktor Sándor<sup>3</sup>, Erika Turcsi <sup>1</sup>, Gergely Gulyás-Fekete <sup>1</sup>, and József Deli <sup>1,2,\*</sup>

<sup>1</sup> Department of Biochemistry and Medical Chemistry, Medical School, University of Pécs, Szigeti út 12., H-7624 Pécs, Hungary

<sup>2</sup> Department of Pharmacognosy, Faculty of Pharmacy, University of Pécs, Rókus u. 2., H-7624 Pécs, Hungary

<sup>3</sup> Institute of Bioanalytics, Medical School, University of Pécs, Szigeti út 12., H-7624 Pécs, Hungary

\* Correspondence: jozsef.deli@aok.pte.hu

**Figure S1.** Structure of carotenoids

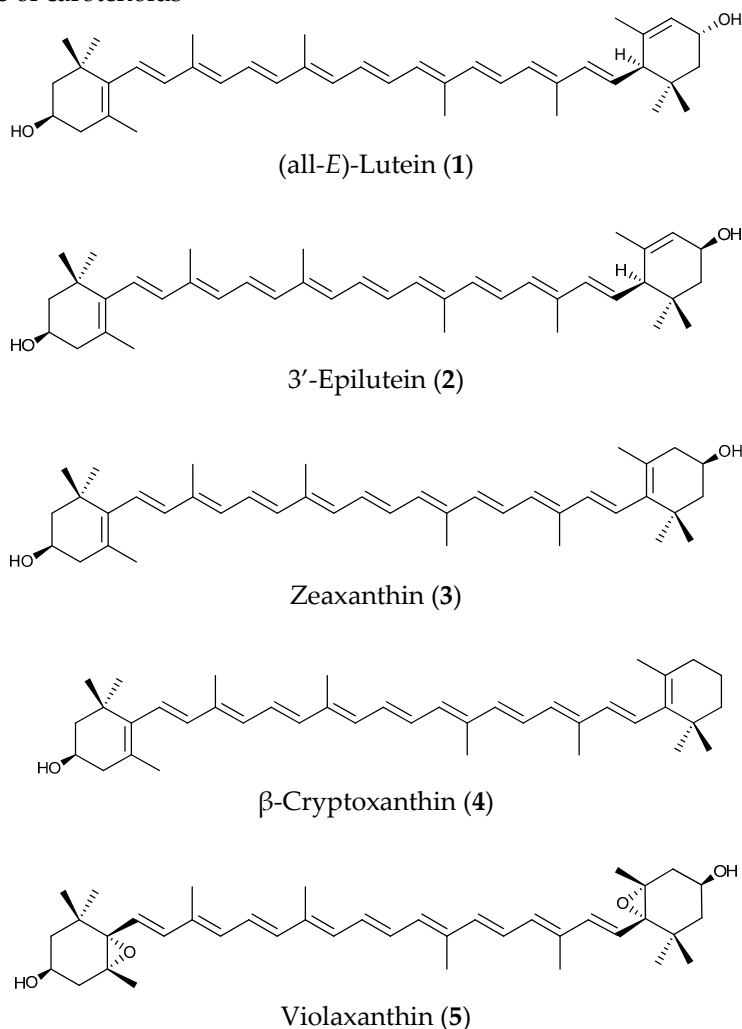

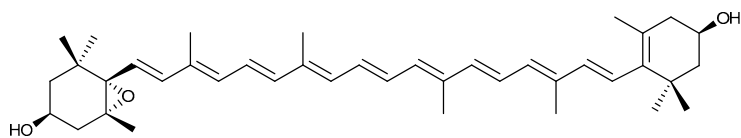

Antheraxanthin (6)

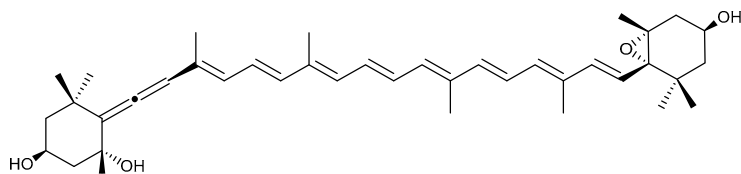

(all-*E*)-Neoxanthin (7)

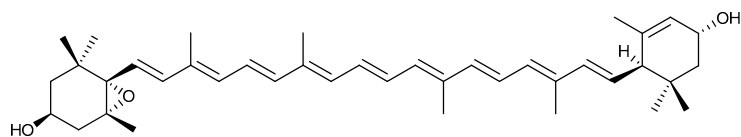

Lutein 5,6-epoxide (8)

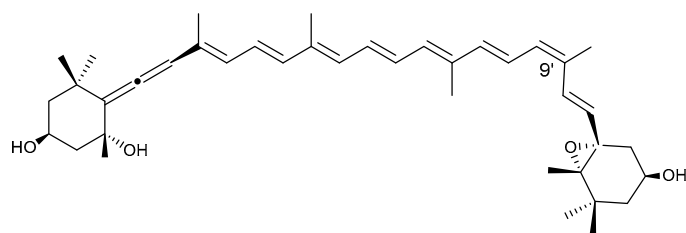

(9'*Z*)-Neoxanthin (9)

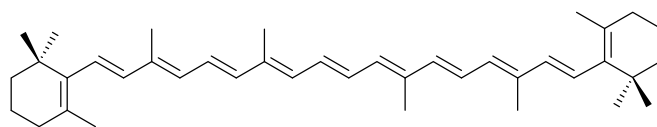

β-Carotene (10)

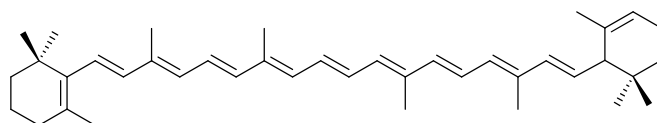

α-Carotene (11)

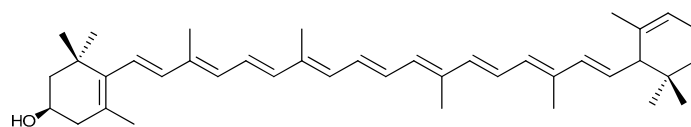

α-Cryptoxanthin (12)

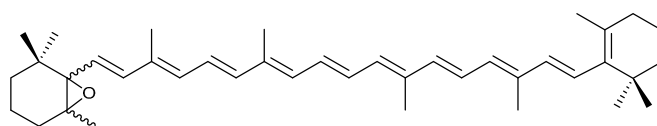

β-Carotene 5,6-epoxide (13)

**Figure S2.** NMR spectra of lutein isomers, in CDCl<sub>3</sub>, (500/125 MHz for <sup>1</sup>H/<sup>13</sup>C)

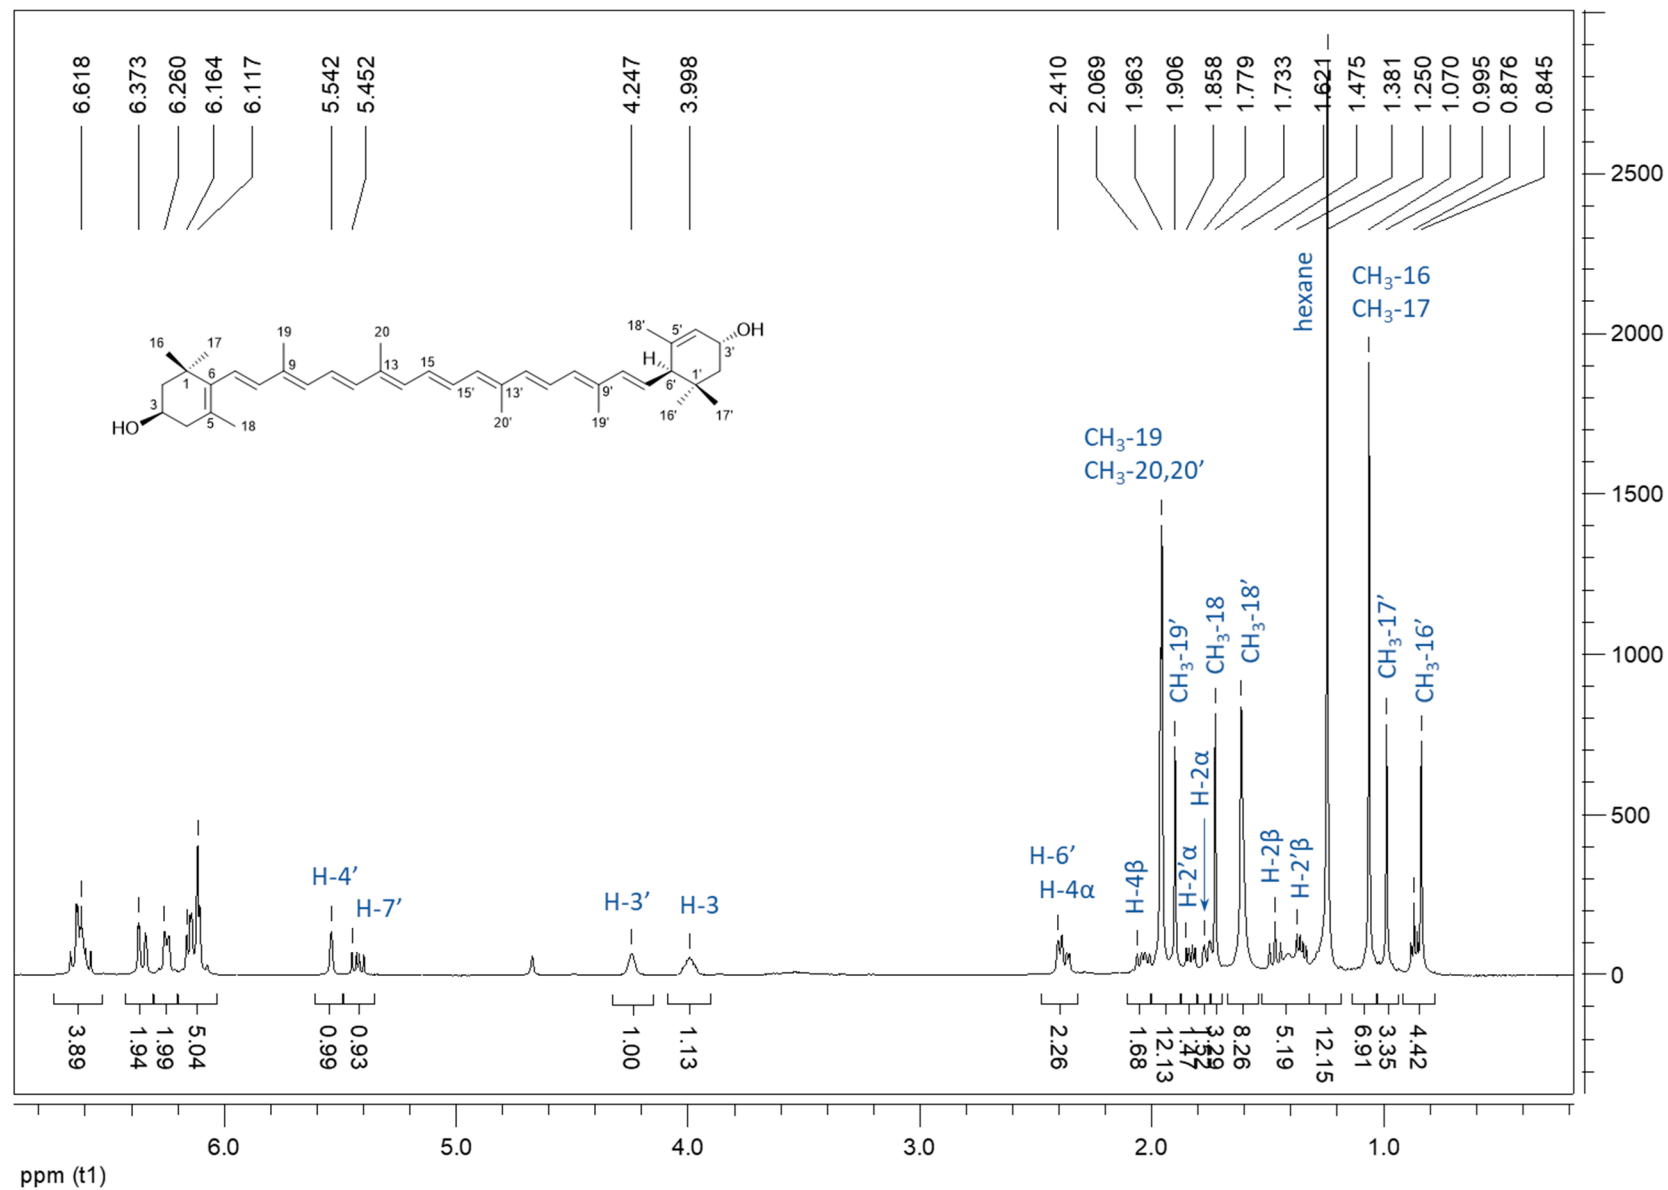

**Figure S2.1.** <sup>1</sup>H-NMR spectrum of (all-E)-lutein in CDCl<sub>3</sub>, (500/125 MHz for <sup>1</sup>H/<sup>13</sup>C)





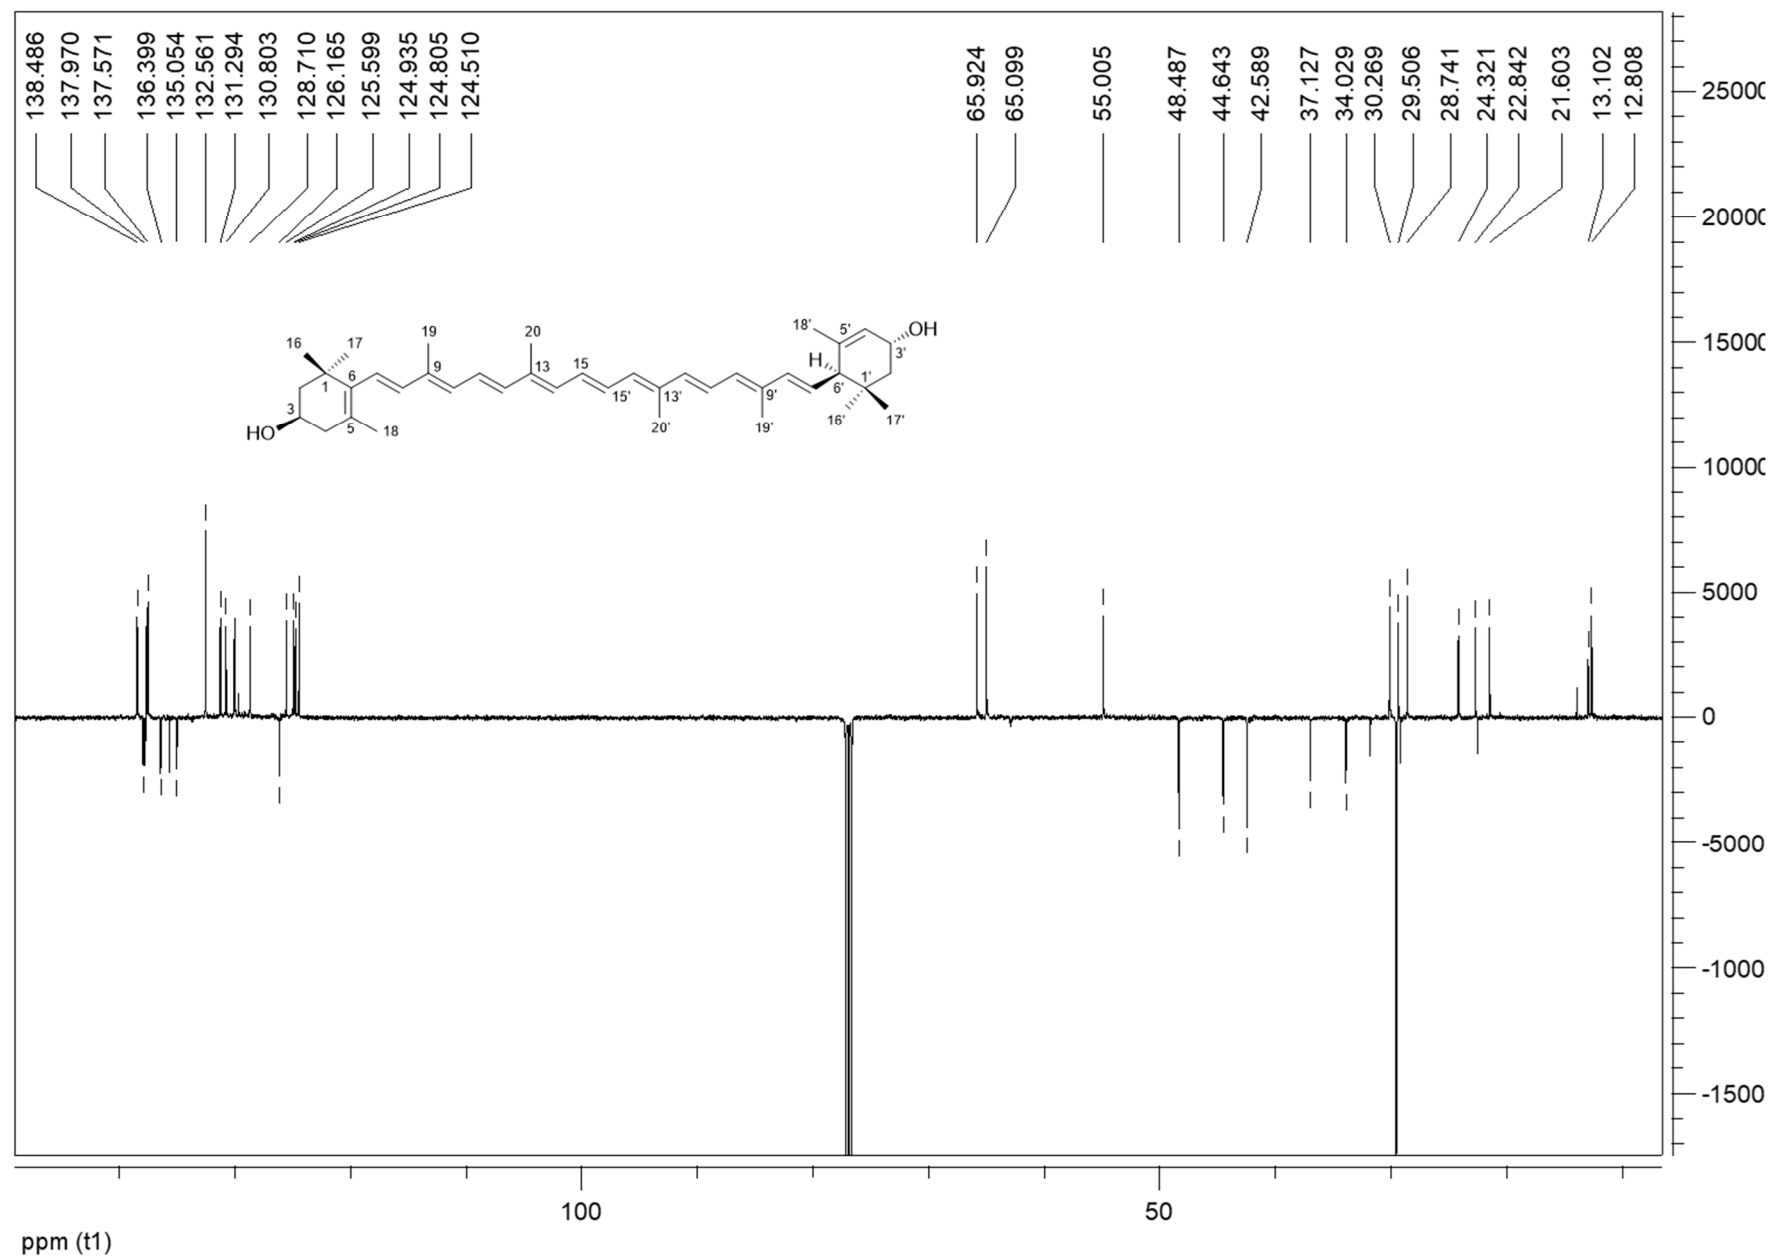

**Figure S2.3.** <sup>13</sup>C-NMR spectrum of (all-*E*)-lutein in CDCl<sub>3</sub>, (500/125 MHz for <sup>1</sup>H/<sup>13</sup>C)

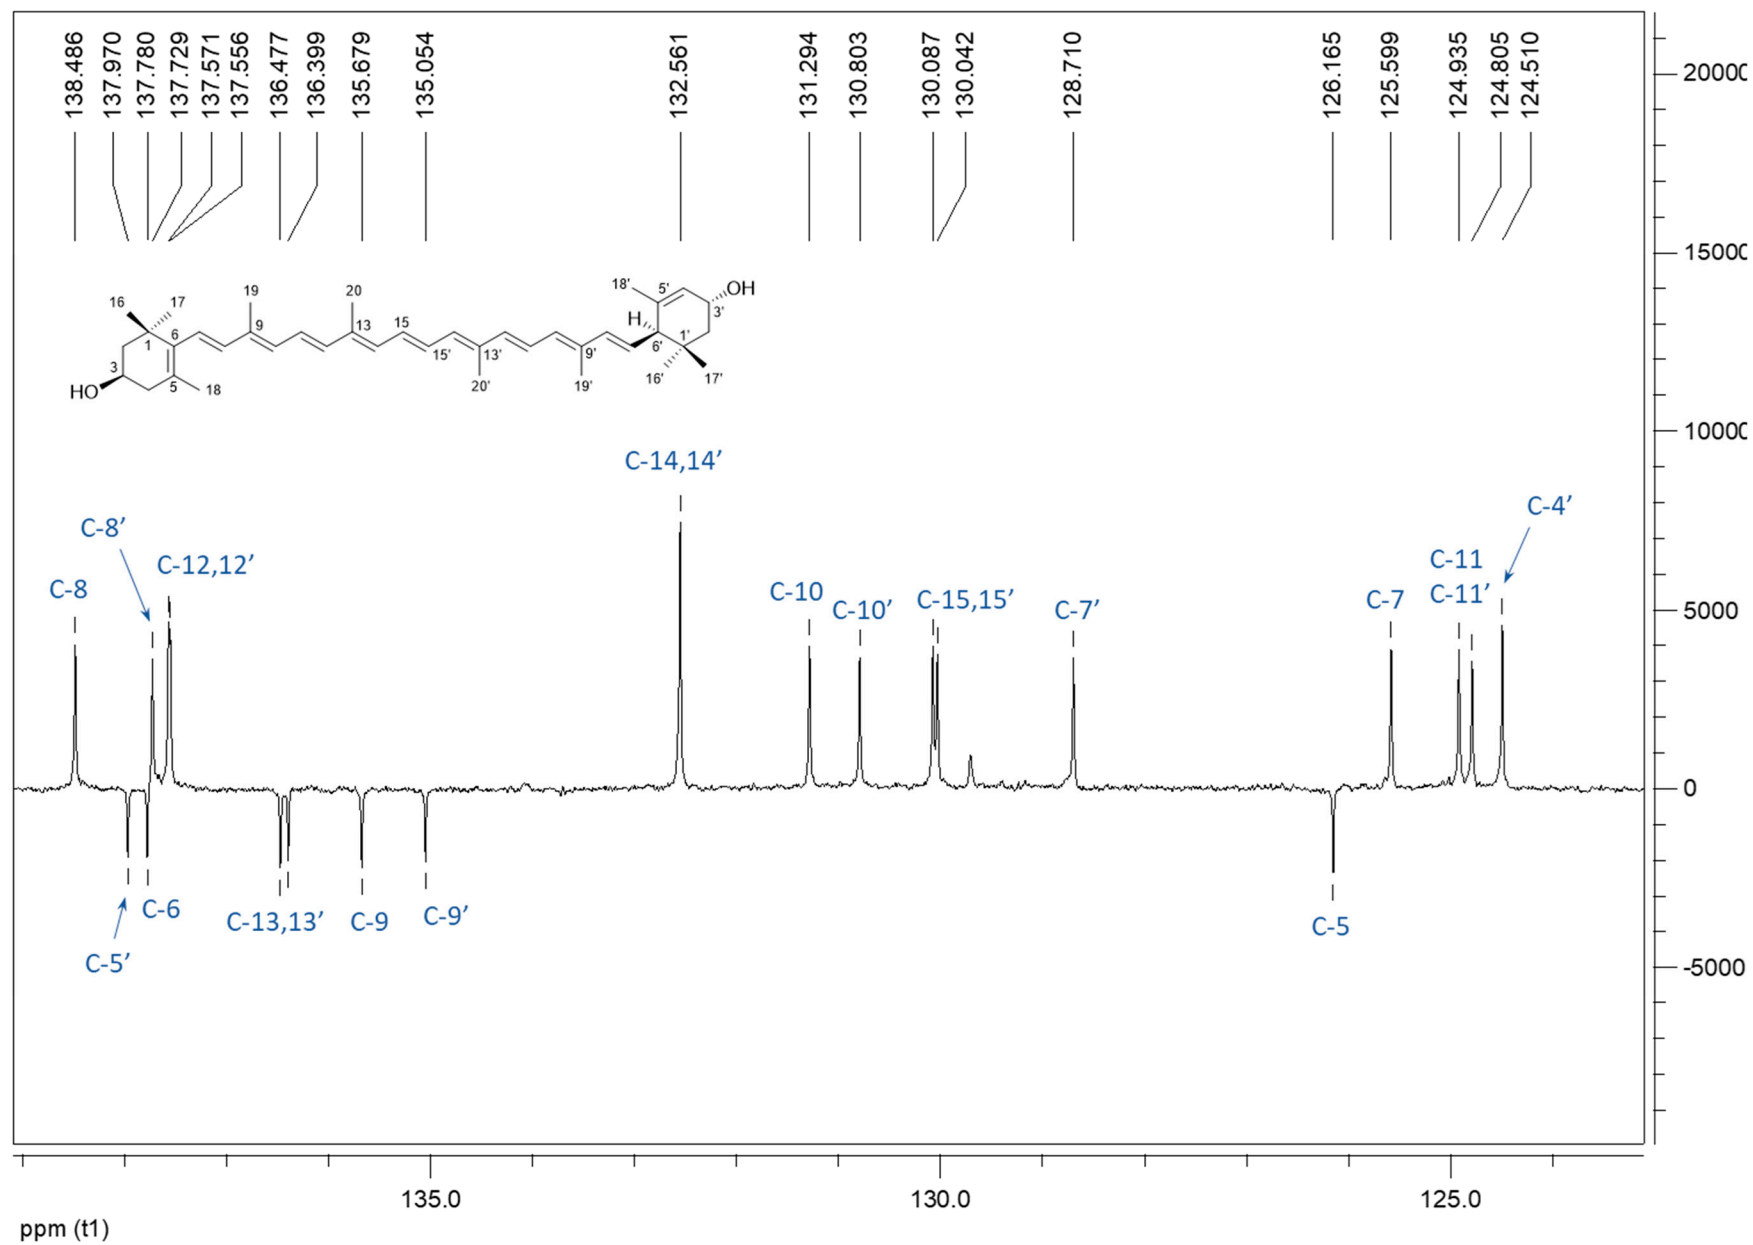

**Figure S2.4.**  $^{13}\text{C}$ -NMR spectrum of (all-*E*)-lutein in  $\text{CDCl}_3$ , (500/125 MHz for  $^1\text{H}/^{13}\text{C}$ )

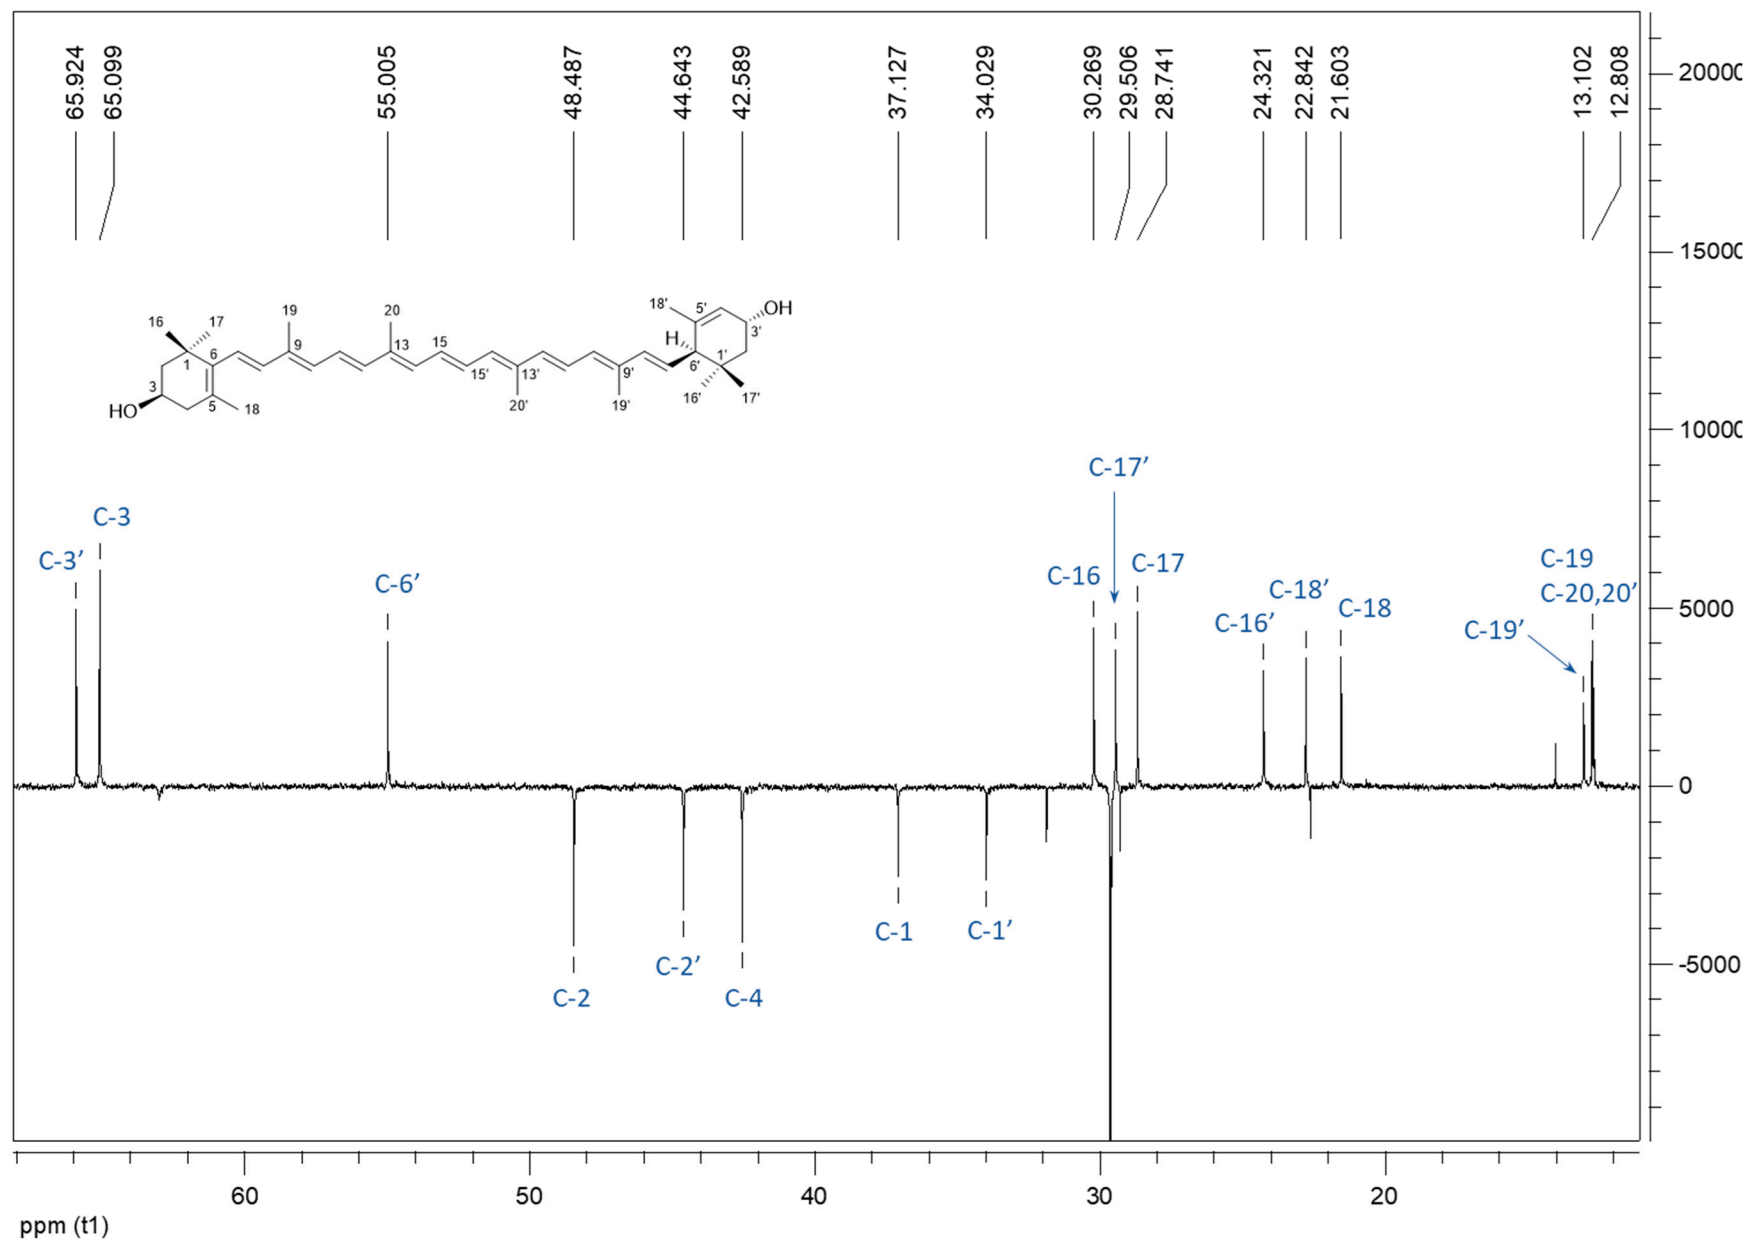

**Figure S2.5.**  $^{13}\text{C}$ -NMR spectrum of (all-*E*)-lutein in  $\text{CDCl}_3$ , (500/125 MHz for  $^1\text{H}/^{13}\text{C}$ )

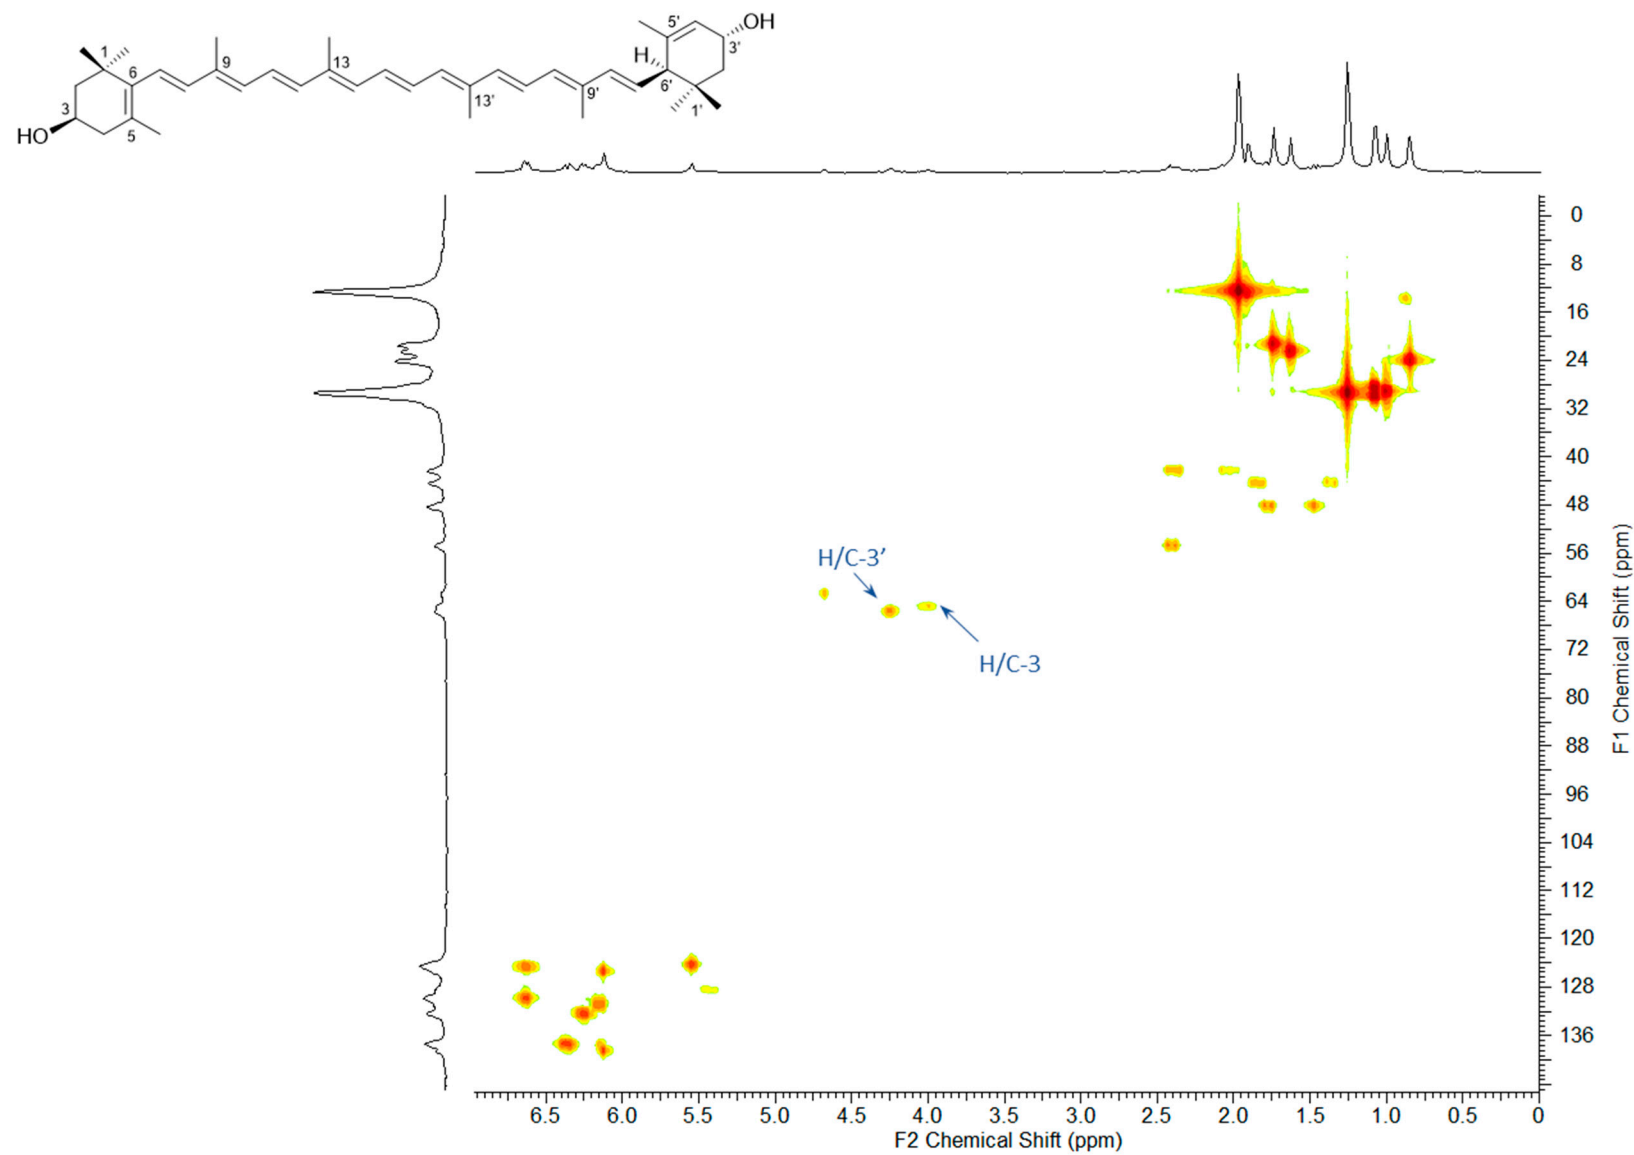

**Figure S2.6.**  $^{13}\text{C}$ - $^1\text{H}$ -HSQC spectrum of (all-*E*)-lutein in  $\text{CDCl}_3$ , (500/125 MHz for  $^1\text{H}/^{13}\text{C}$ )

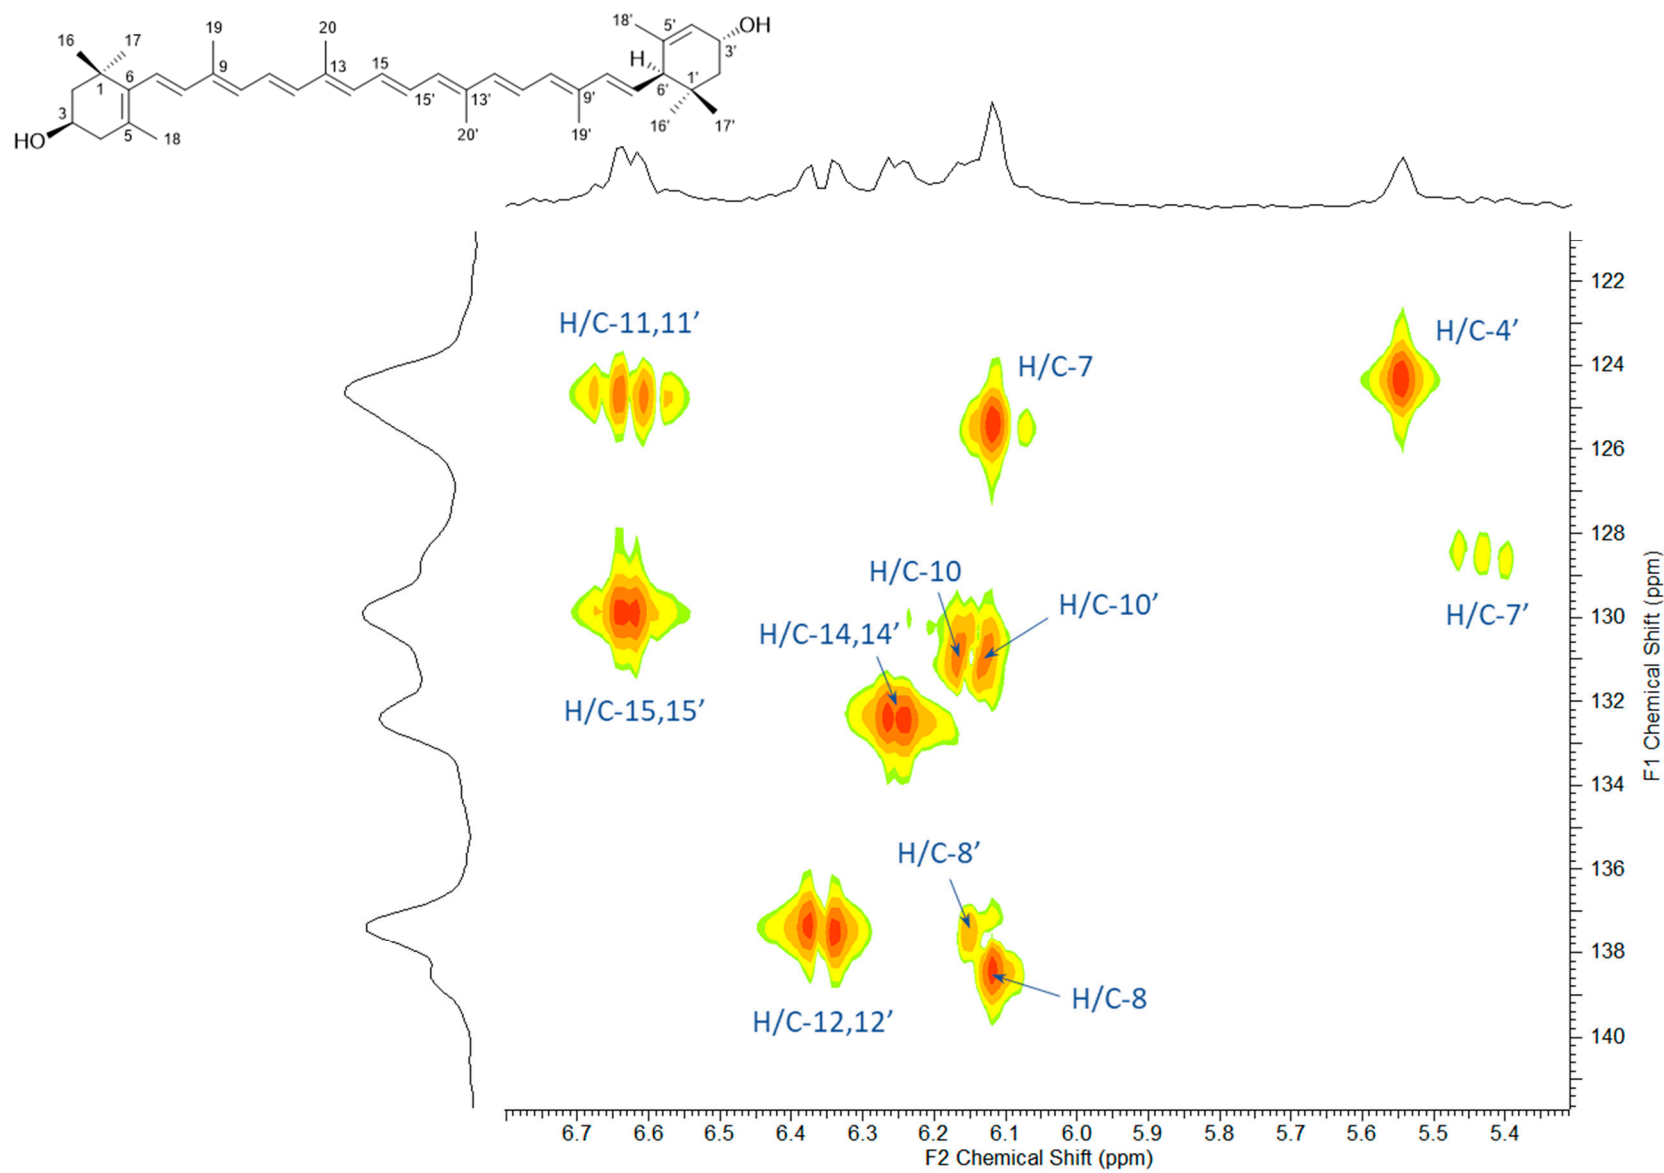

**Figure S2.7.**  $^{13}\text{C}$ - $^1\text{H}$ -HSQC spectrum of (all-*E*)-lutein in  $\text{CDCl}_3$ , (500/125 MHz for  $^1\text{H}/^{13}\text{C}$ )

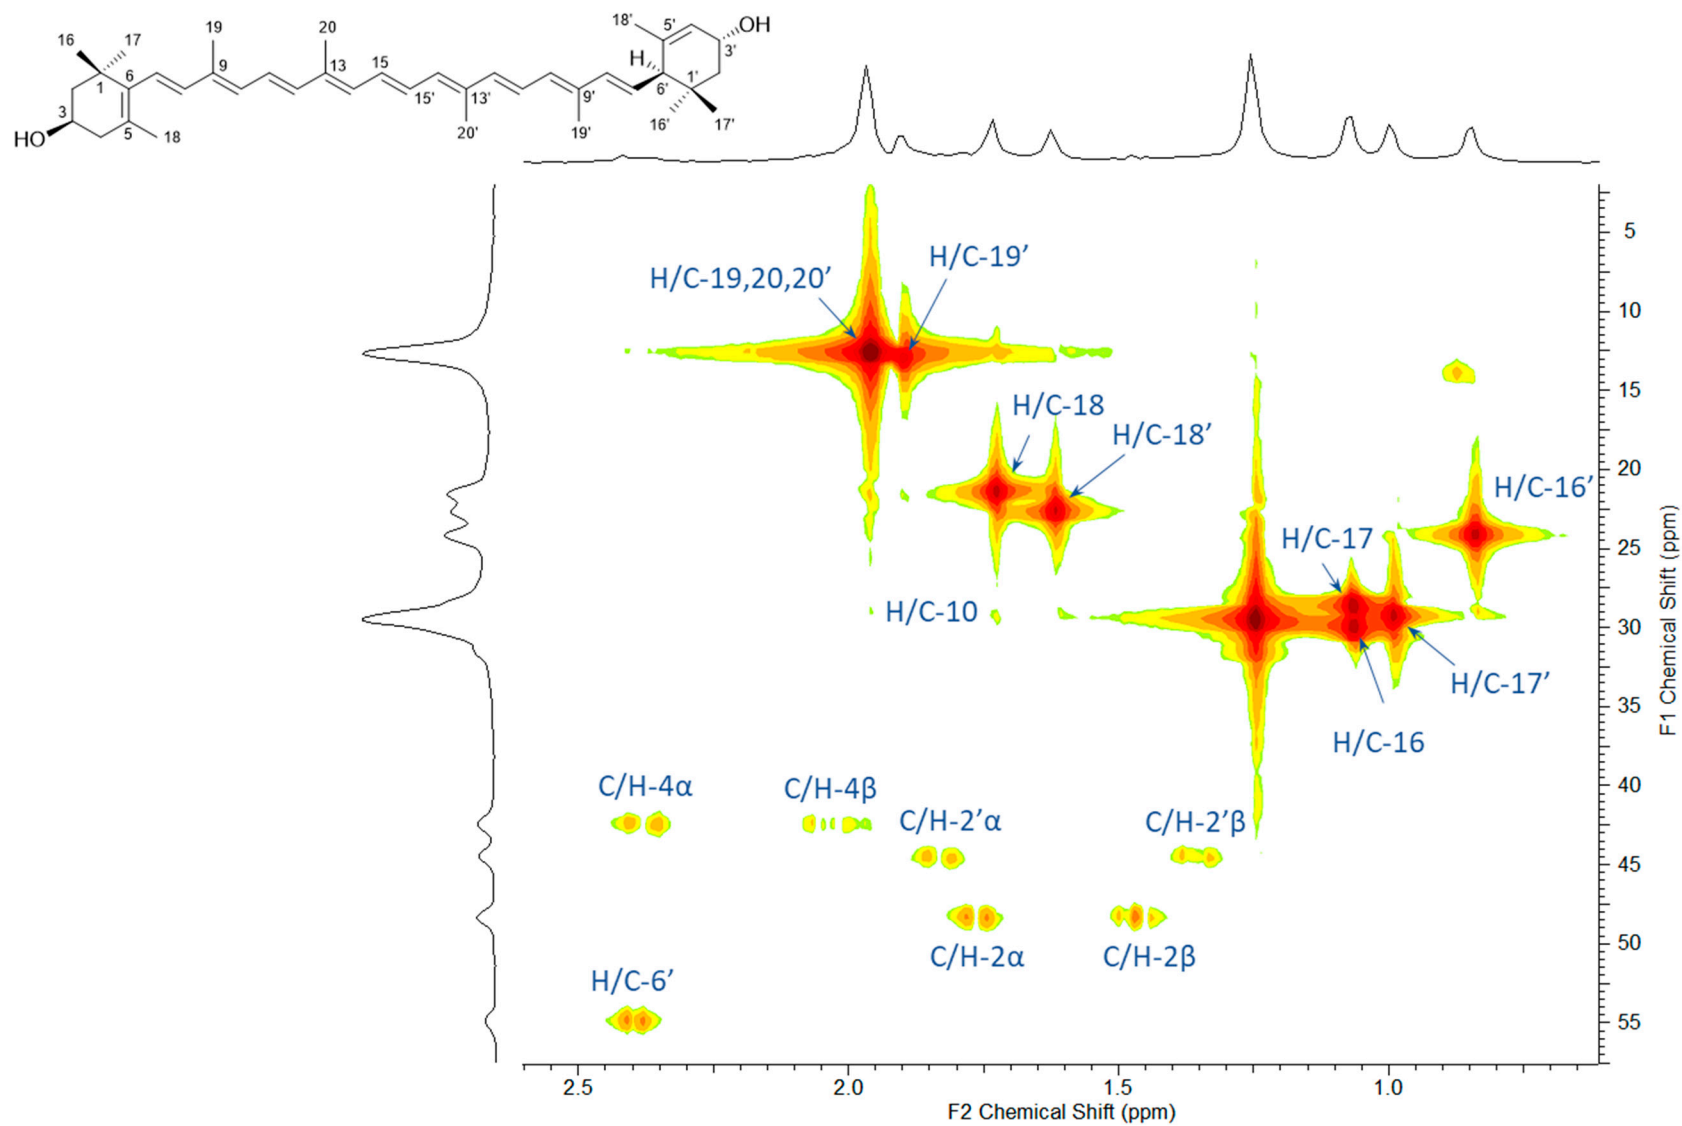

**Figure S2.8.**  $^{13}\text{C}$ - $^1\text{H}$ -HSQC spectrum of (all-*E*)-lutein in  $\text{CDCl}_3$ , (500/125 MHz for  $^1\text{H}/^{13}\text{C}$ )

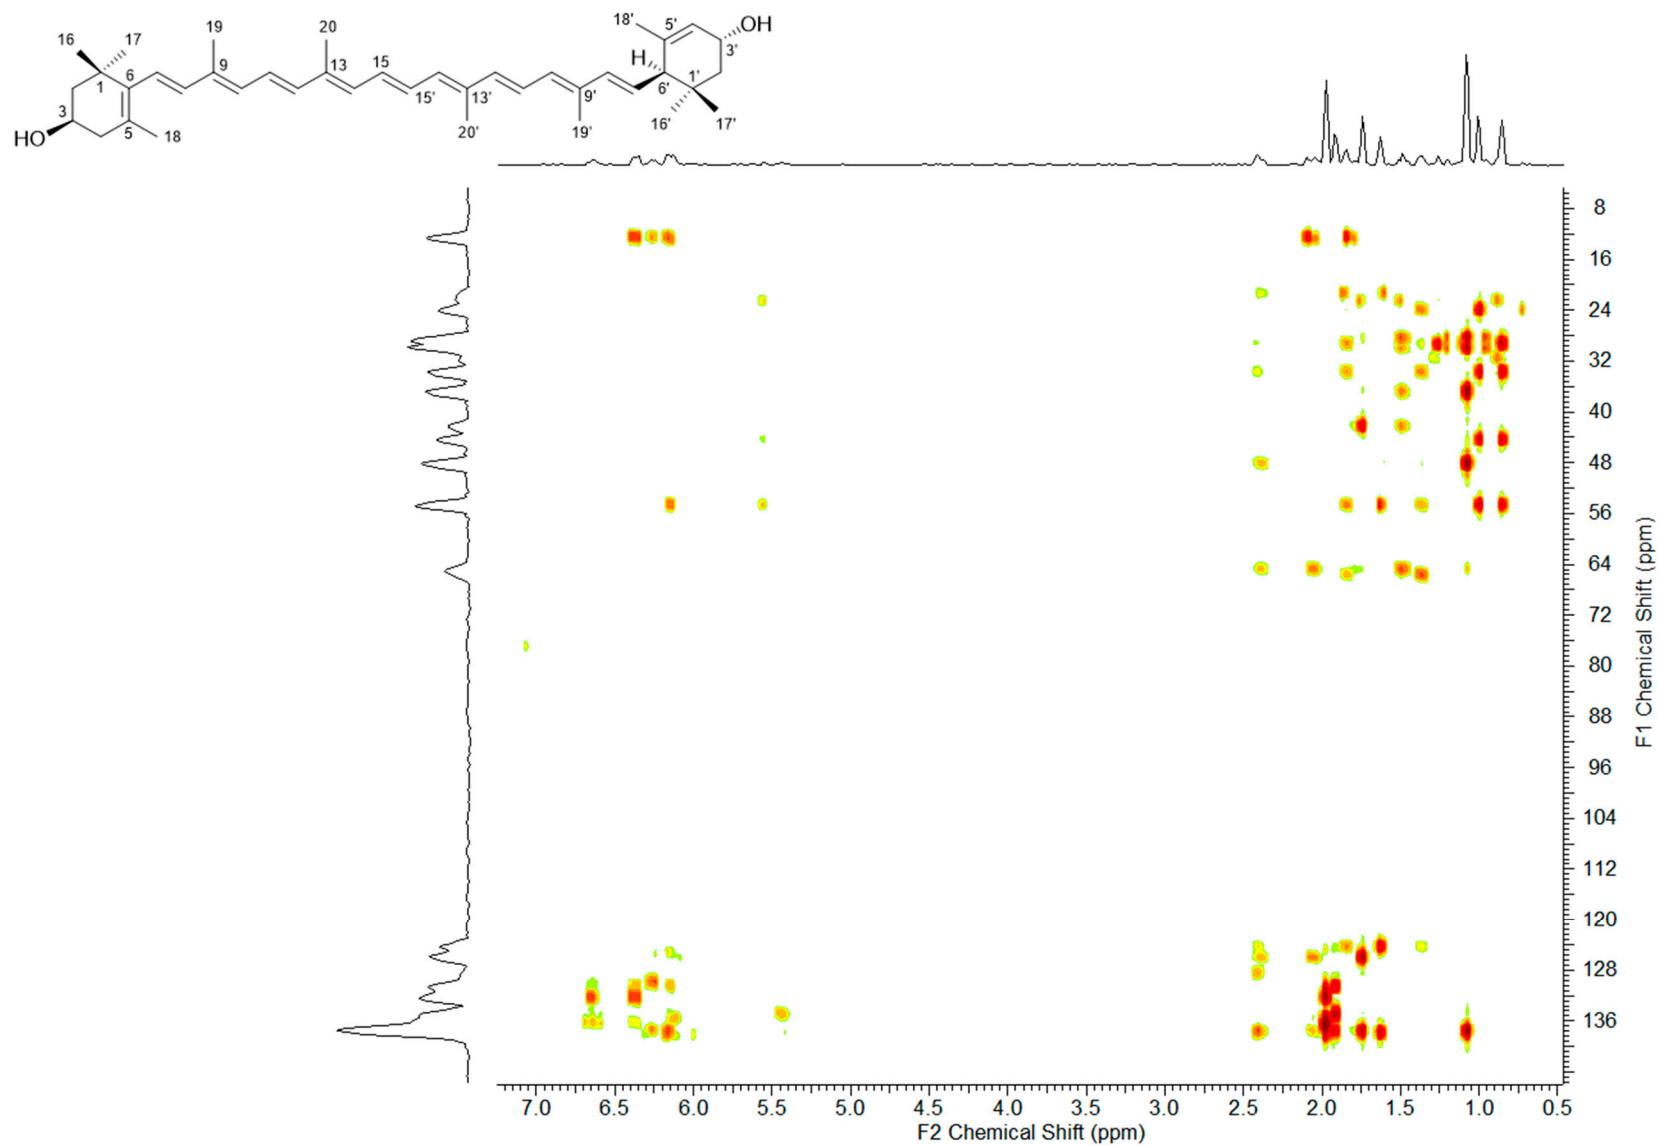

**Figure S2.9.**  $^{13}\text{C}$ - $^1\text{H}$ -HMBC spectrum of (all-*E*)-lutein in  $\text{CDCl}_3$ , (500/125 MHz for  $^1\text{H}/^{13}\text{C}$ )

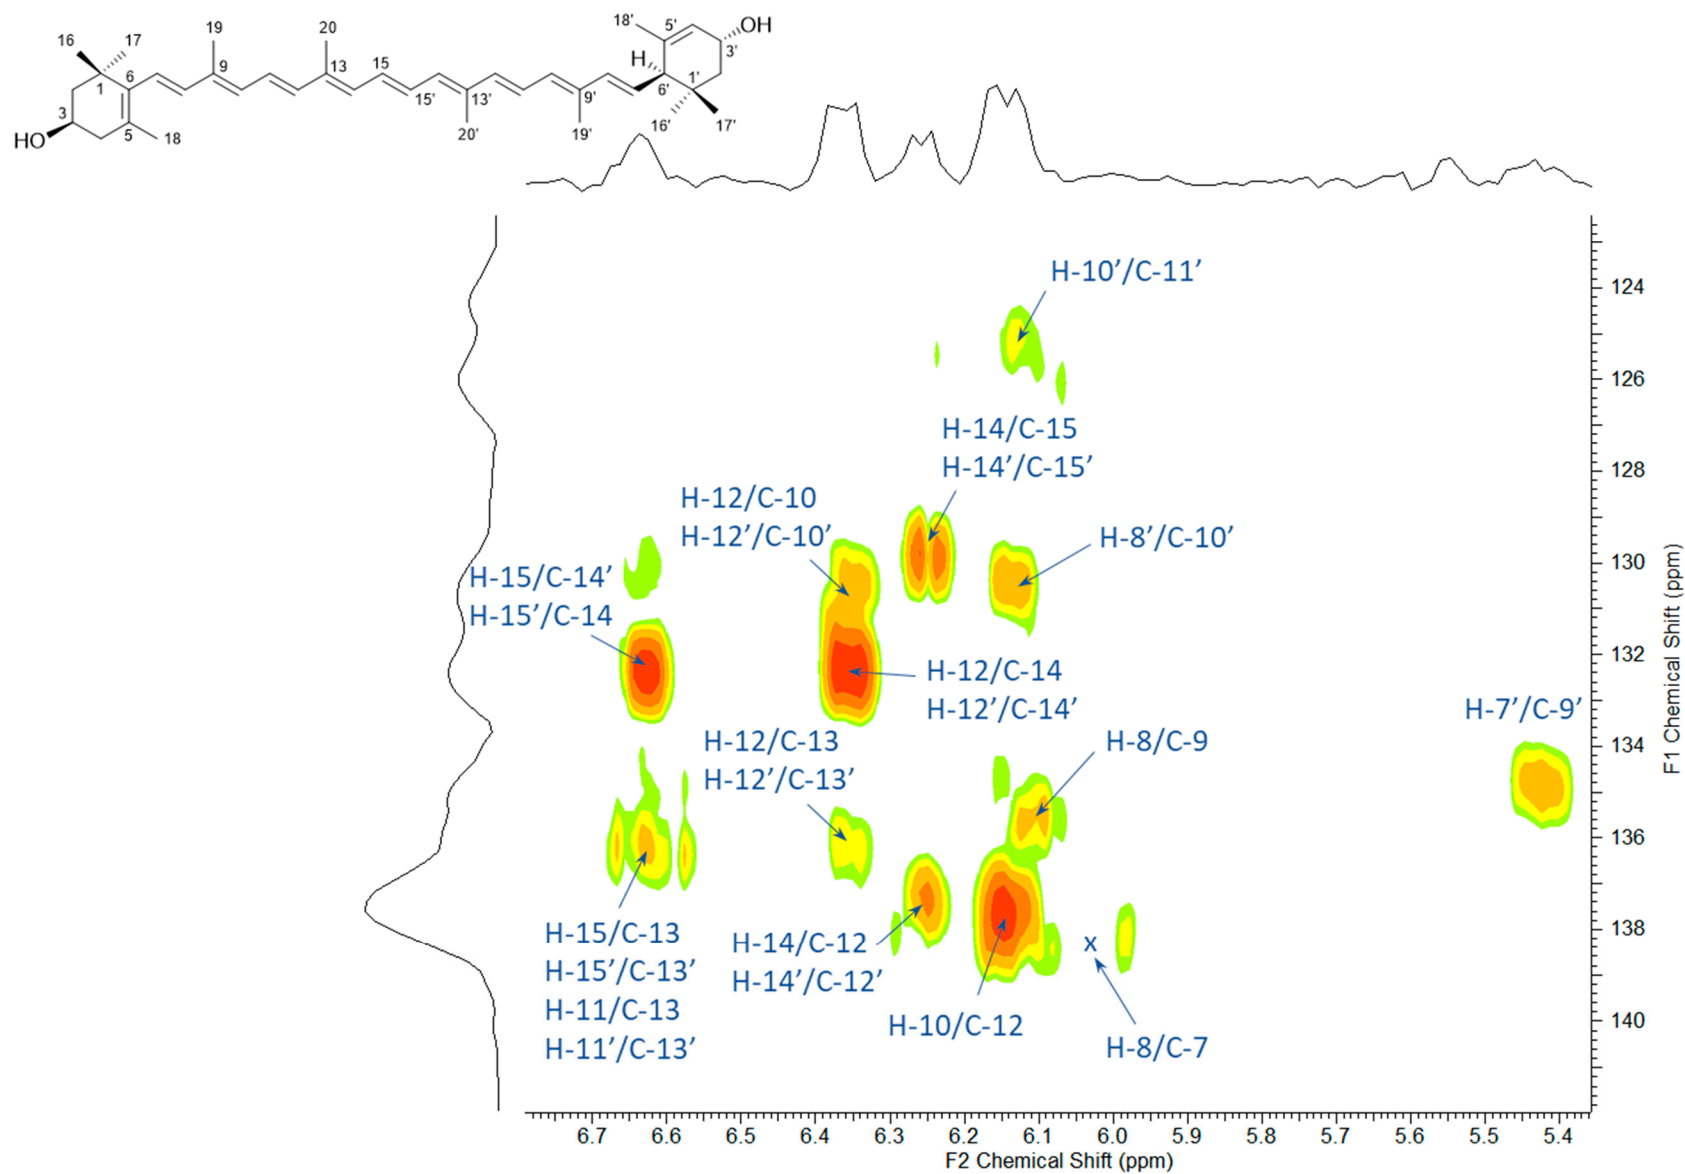

**Figure S2.10.**  $^{13}\text{C}$ - $^1\text{H}$ -HMBC spectrum of (all-*E*)-lutein in  $\text{CDCl}_3$ , (500/125 MHz for  $^1\text{H}/^{13}\text{C}$ )



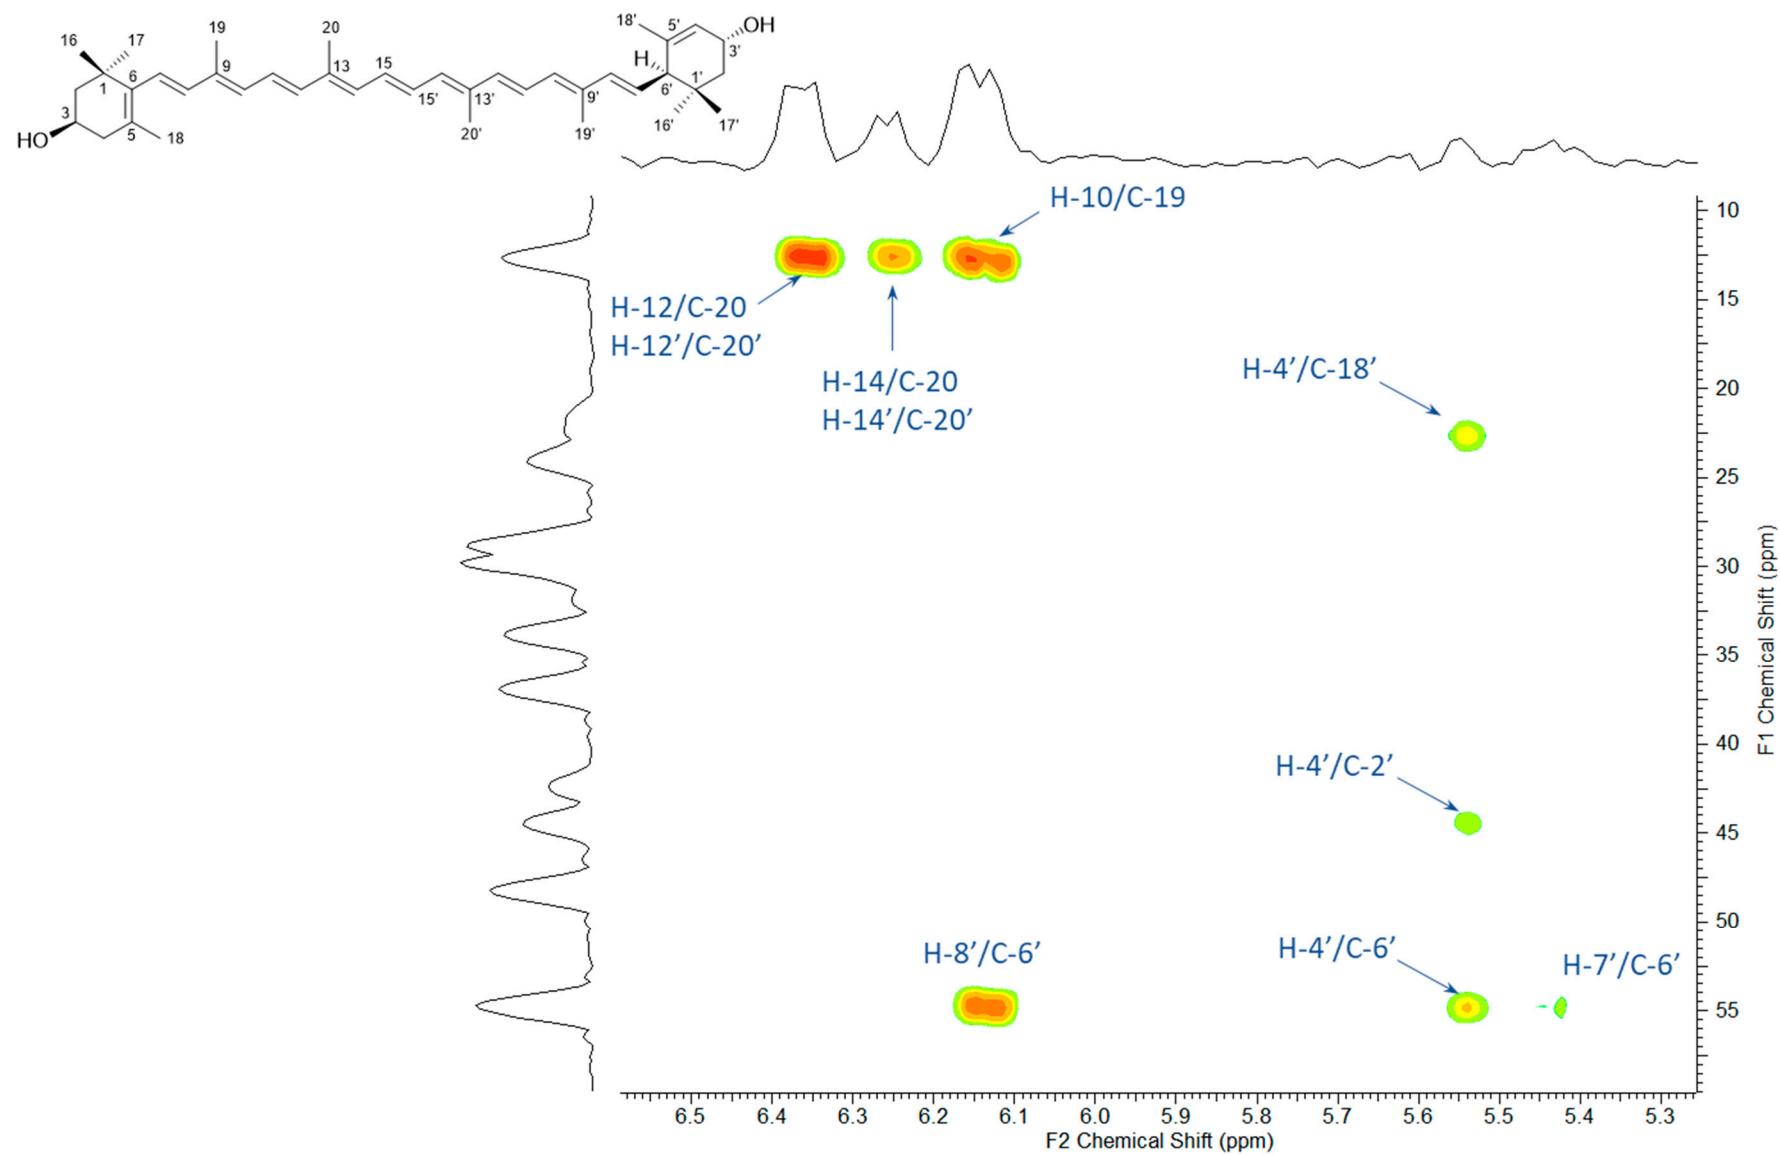

**Figure S2.11.**  $^{13}\text{C}$ - $^1\text{H}$ -HMBC spectrum of (all-*E*)-lutein in  $\text{CDCl}_3$ , (500/125 MHz for  $^1\text{H}/^{13}\text{C}$ )

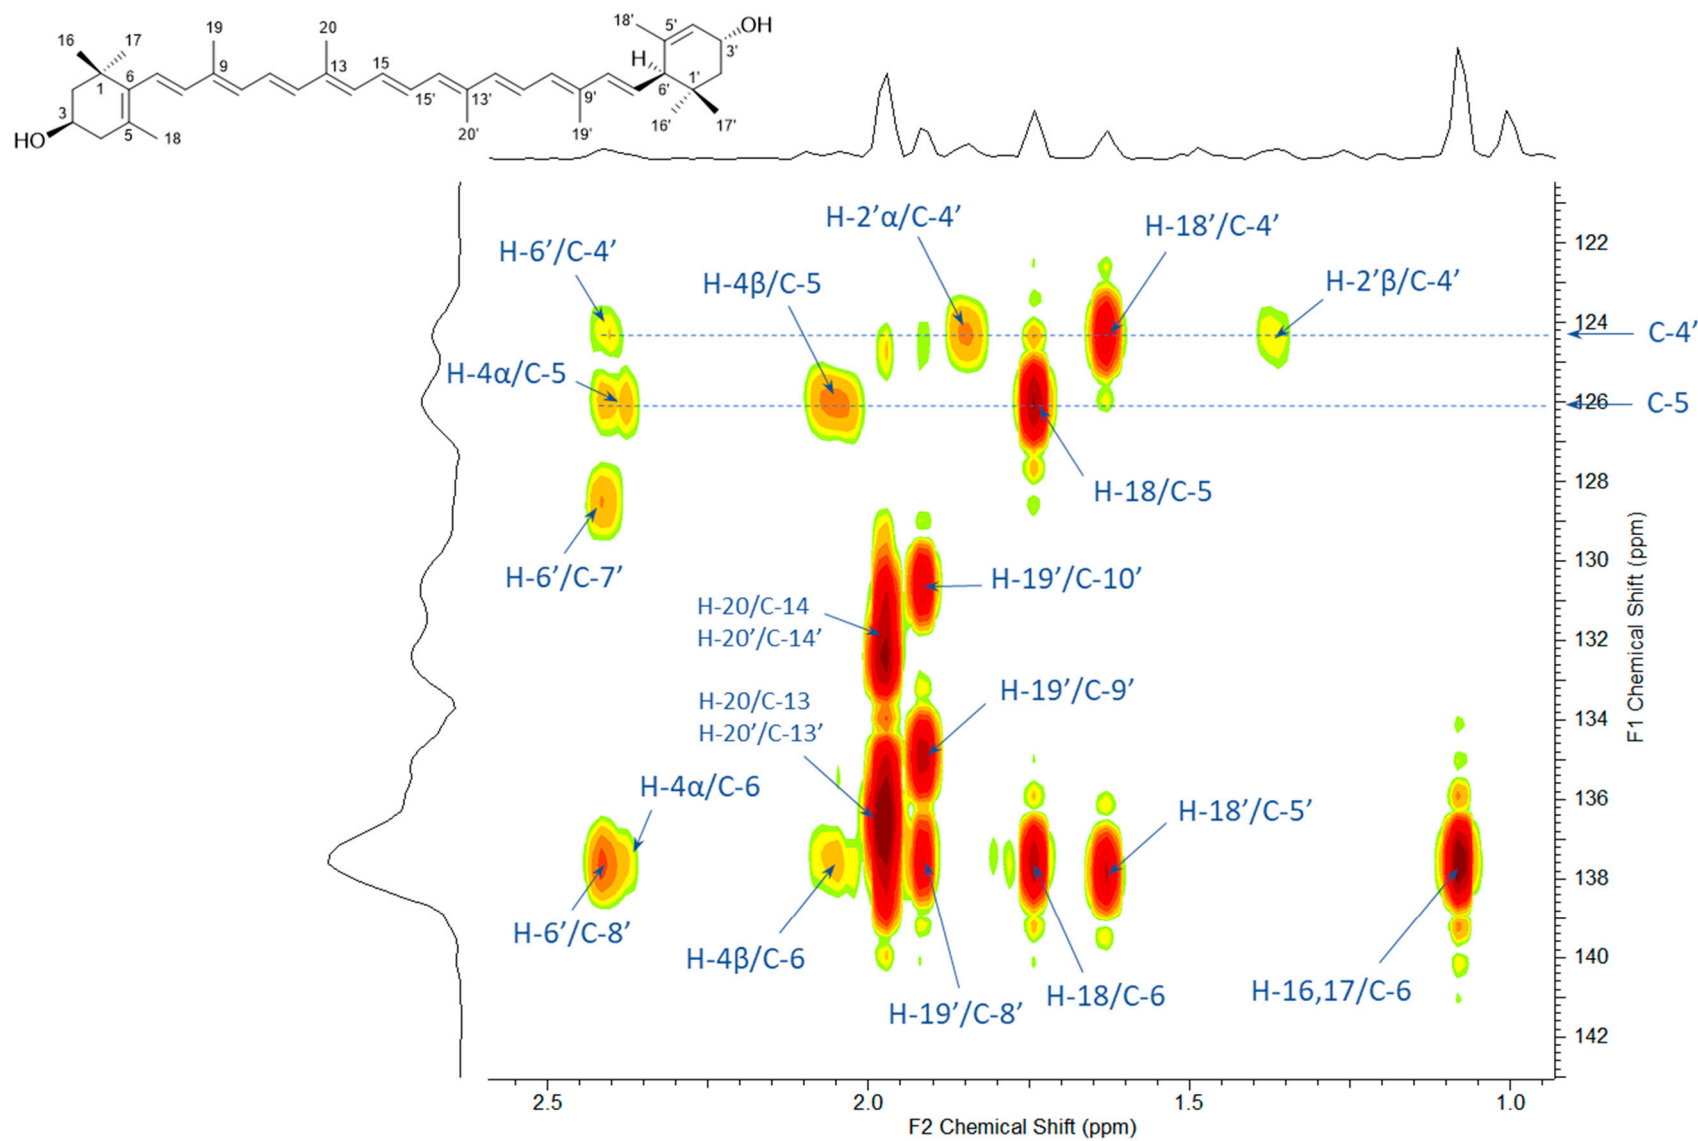

**Figure S2.12.**  $^{13}\text{C}$ - $^1\text{H}$ -HMBC spectrum of (all-*E*)-lutein in  $\text{CDCl}_3$ , (500/125 MHz for  $^1\text{H}/^{13}\text{C}$ )

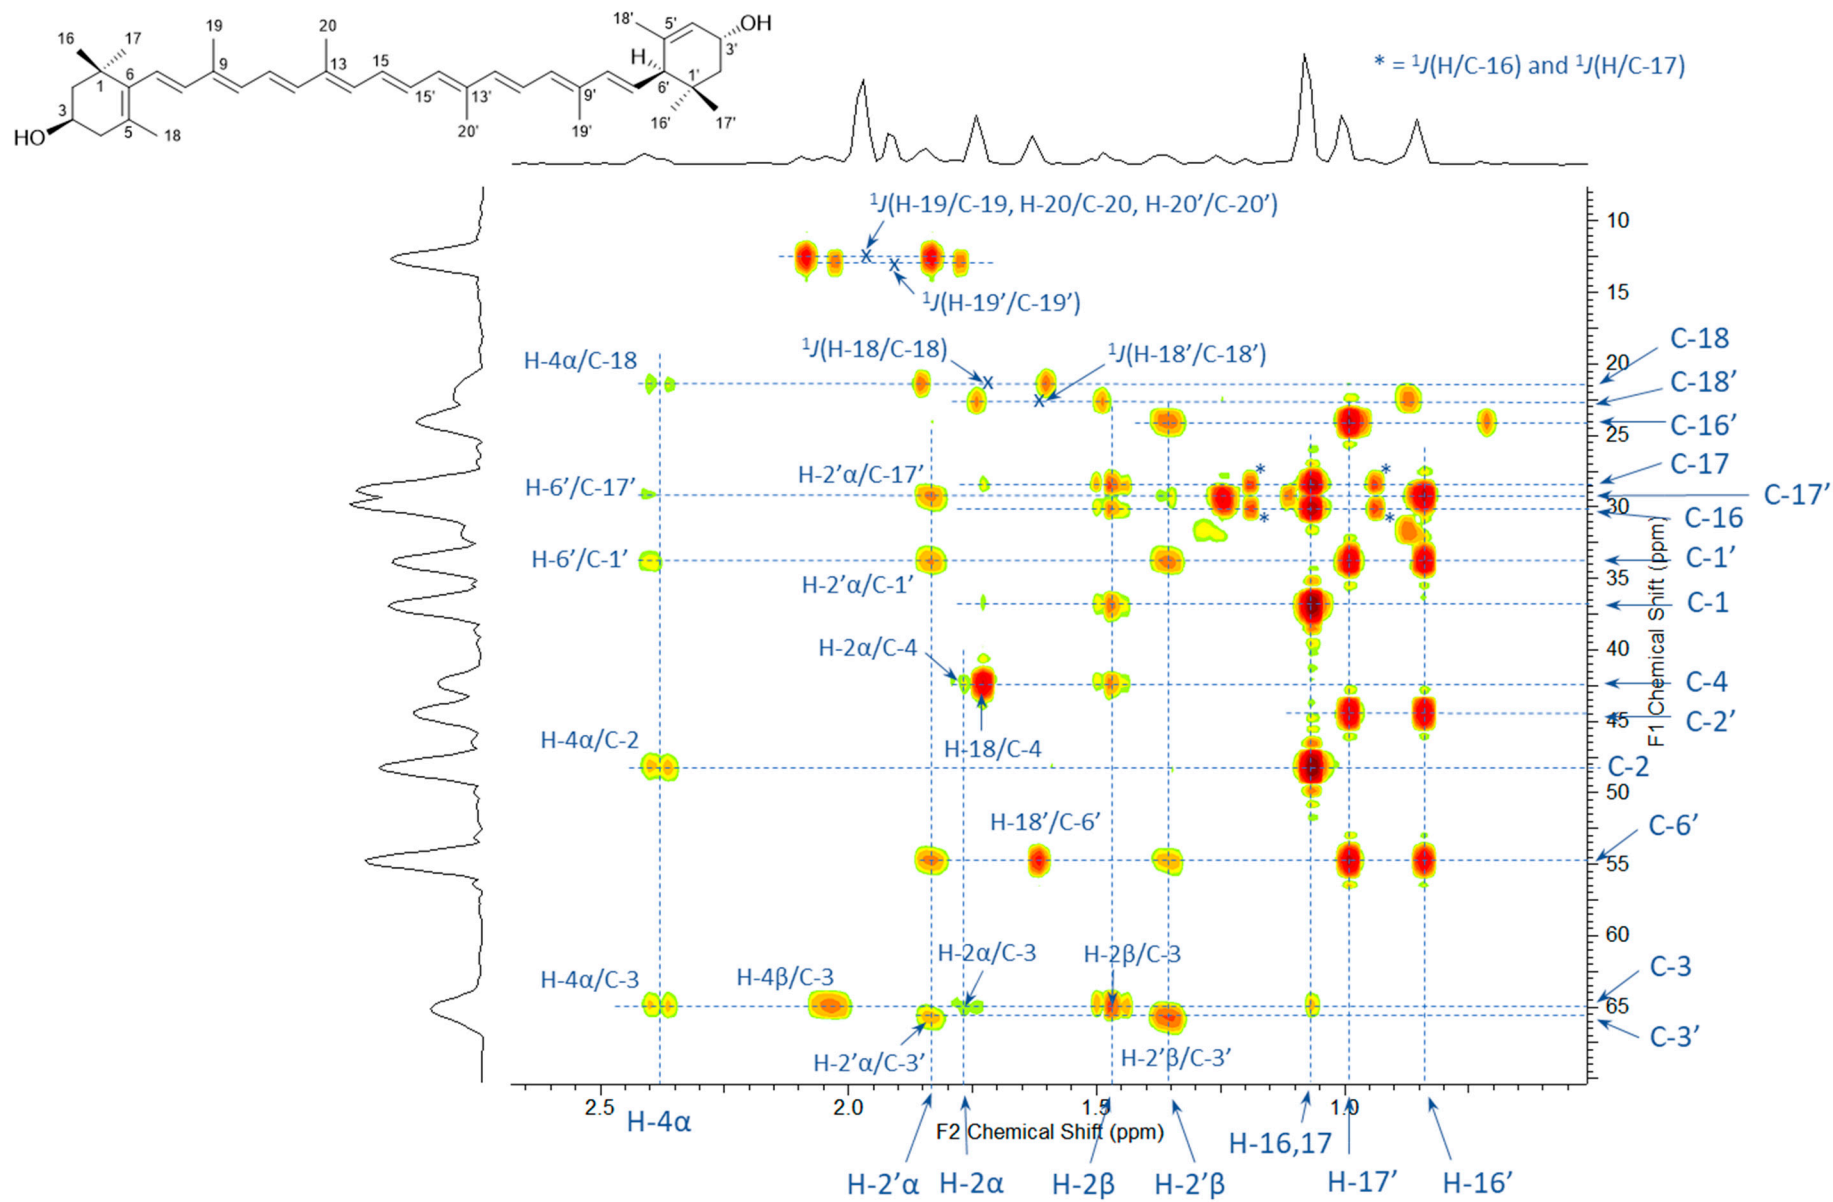

**Figure S2.13.**  $^{13}\text{C}$ - $^1\text{H}$ -HMBC spectrum of (all-*E*)-lutein in  $\text{CDCl}_3$ , (500/125 MHz for  $^1\text{H}/^{13}\text{C}$ )



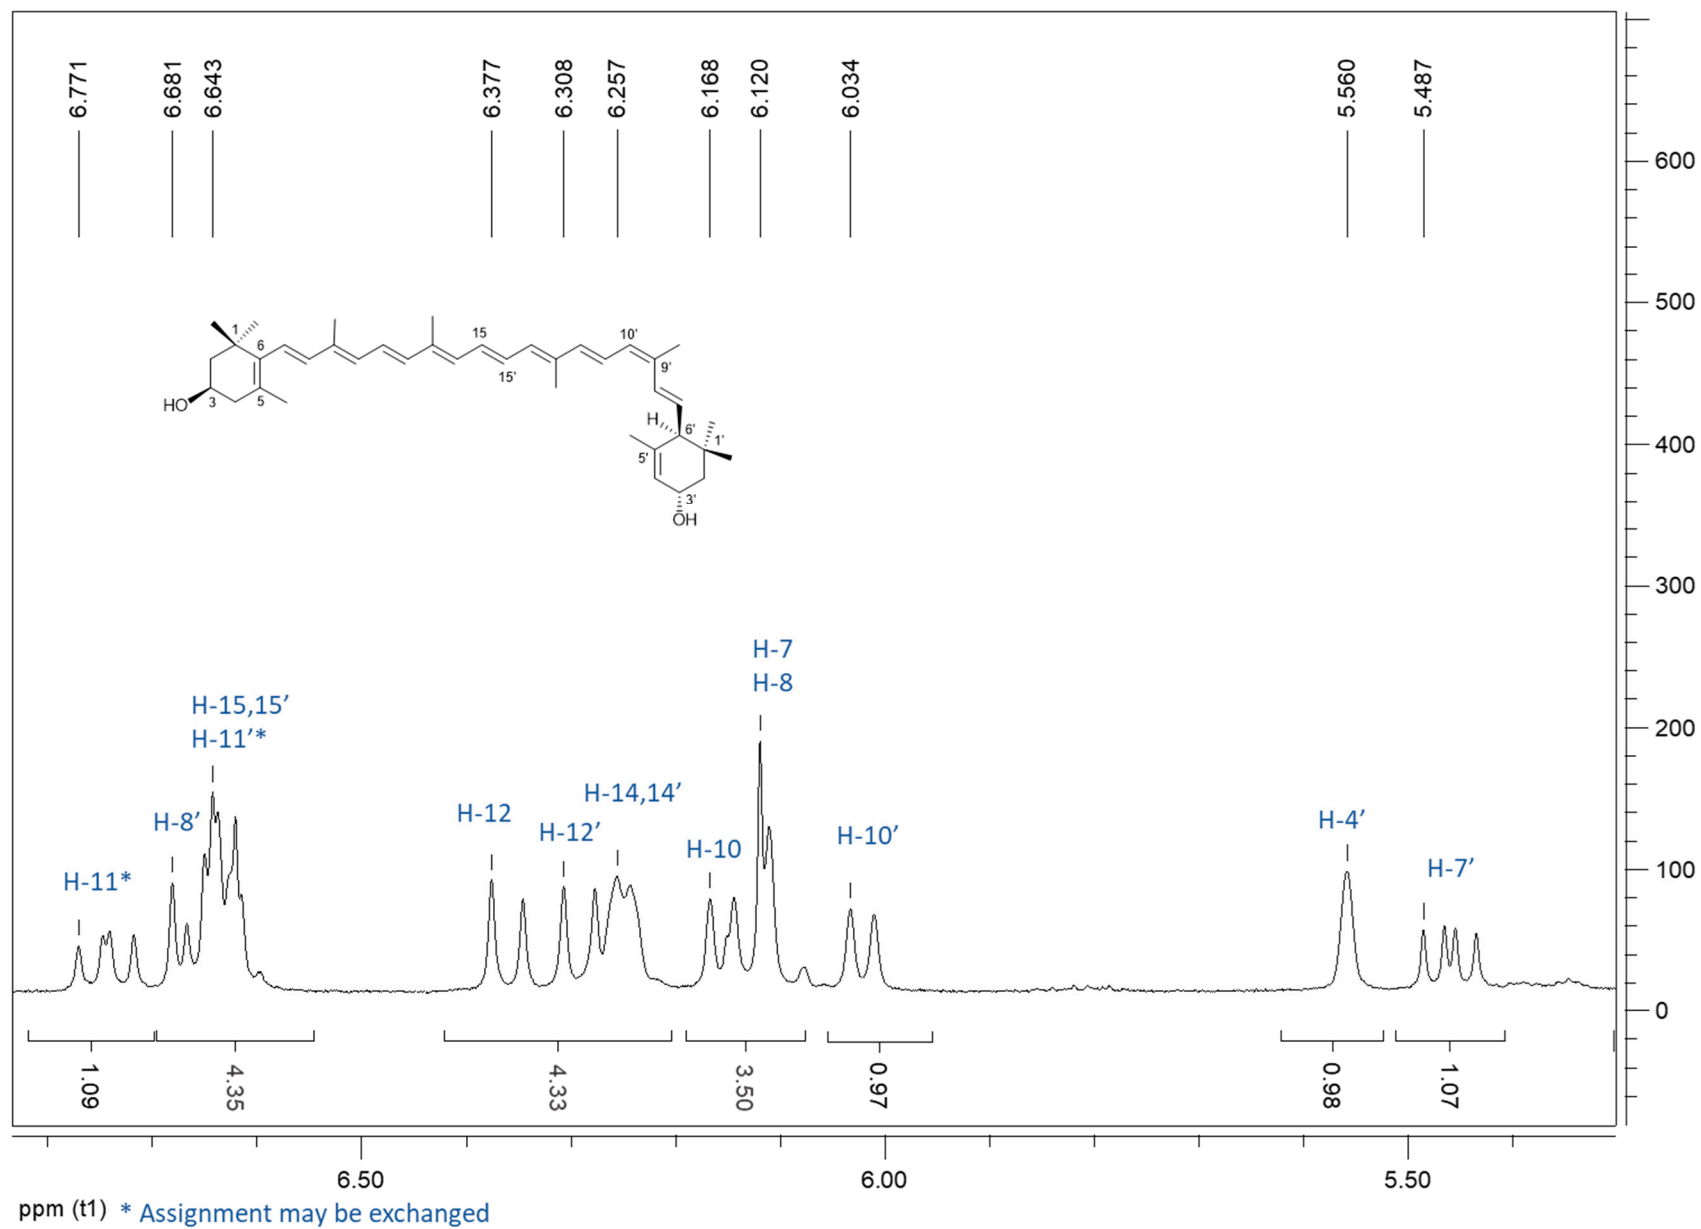

**Figure S2.15.**  $^1\text{H}$ -NMR spectrum of (9'Z)-lutein in  $\text{CDCl}_3$ , (500/125 MHz for  $^1\text{H}/^{13}\text{C}$ )





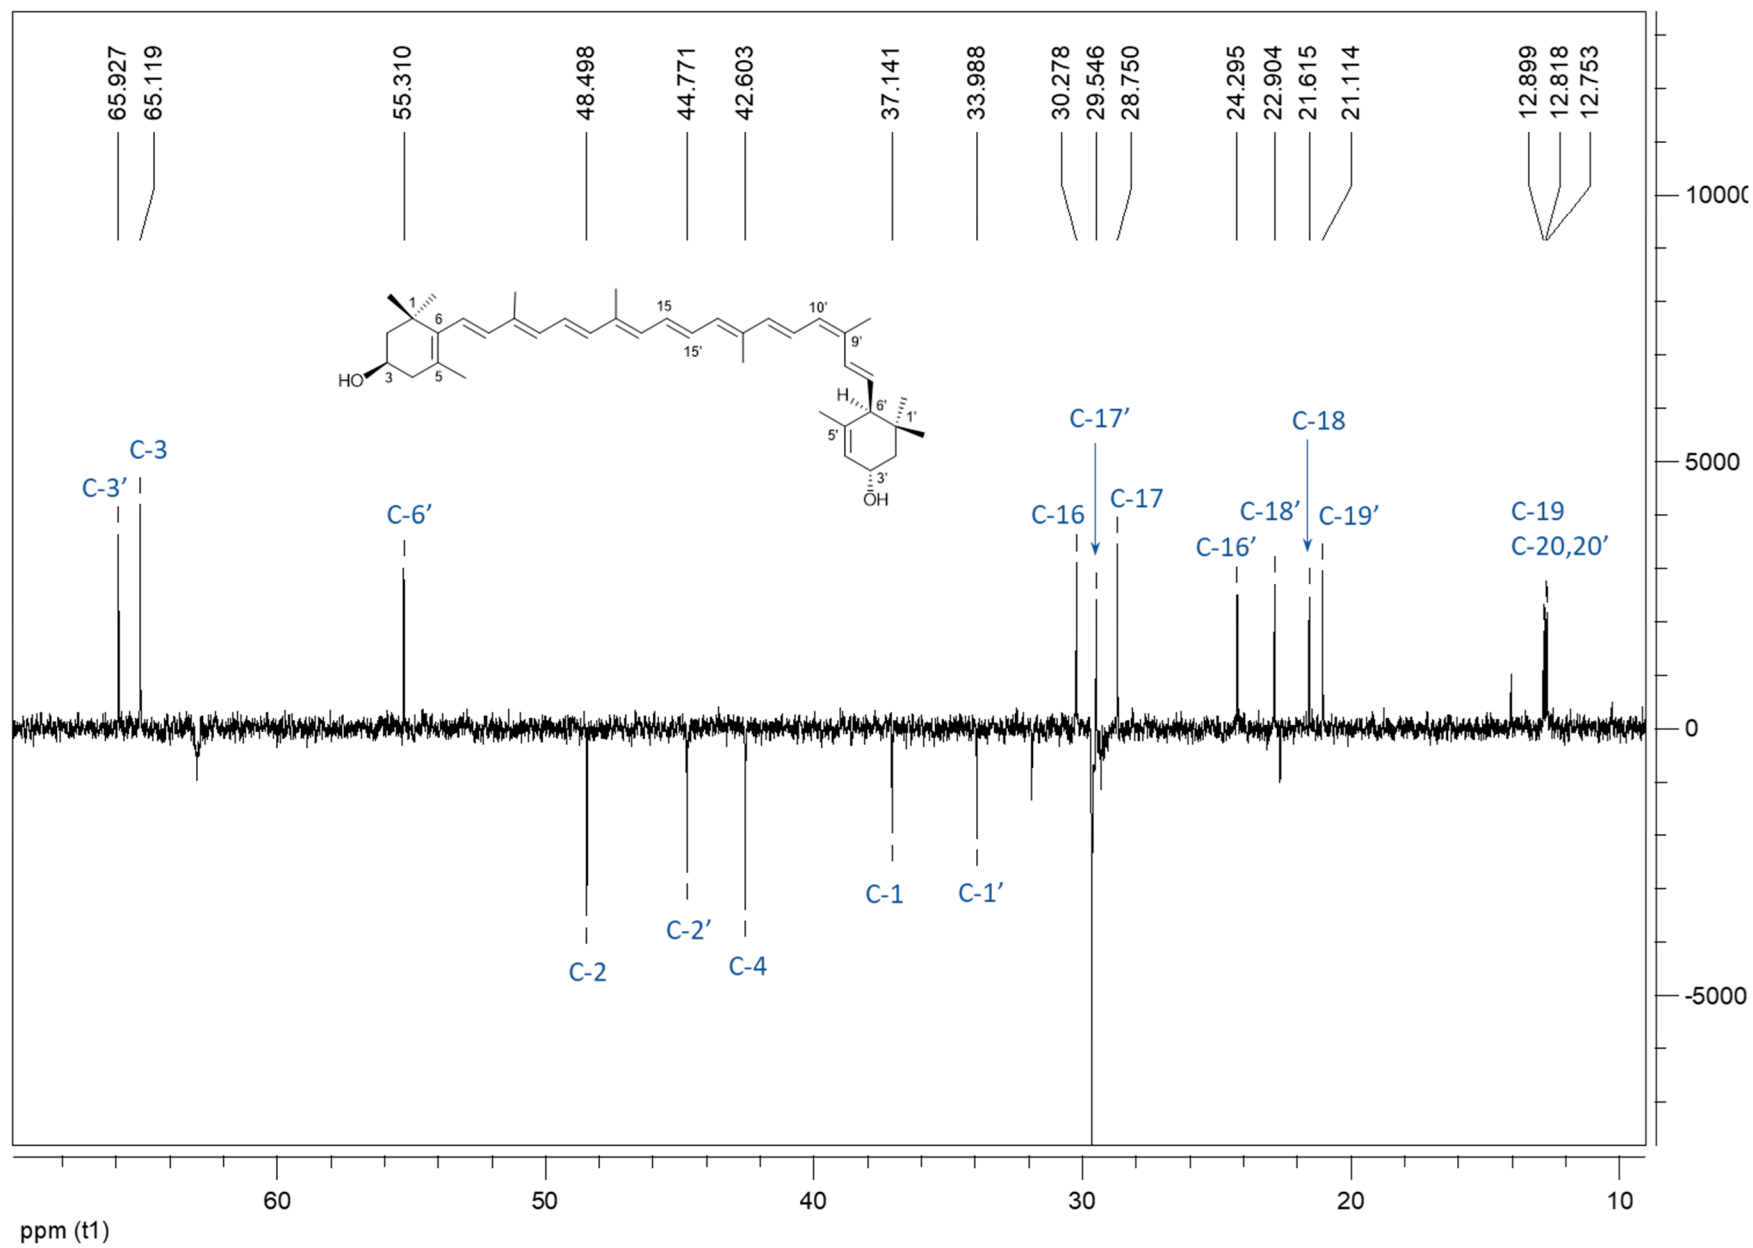

**Figure S2.18.**  $^{13}\text{C}$ -NMR spectrum of (9'Z)-lutein in  $\text{CDCl}_3$ , (500/125 MHz for  $^1\text{H}/^{13}\text{C}$ )



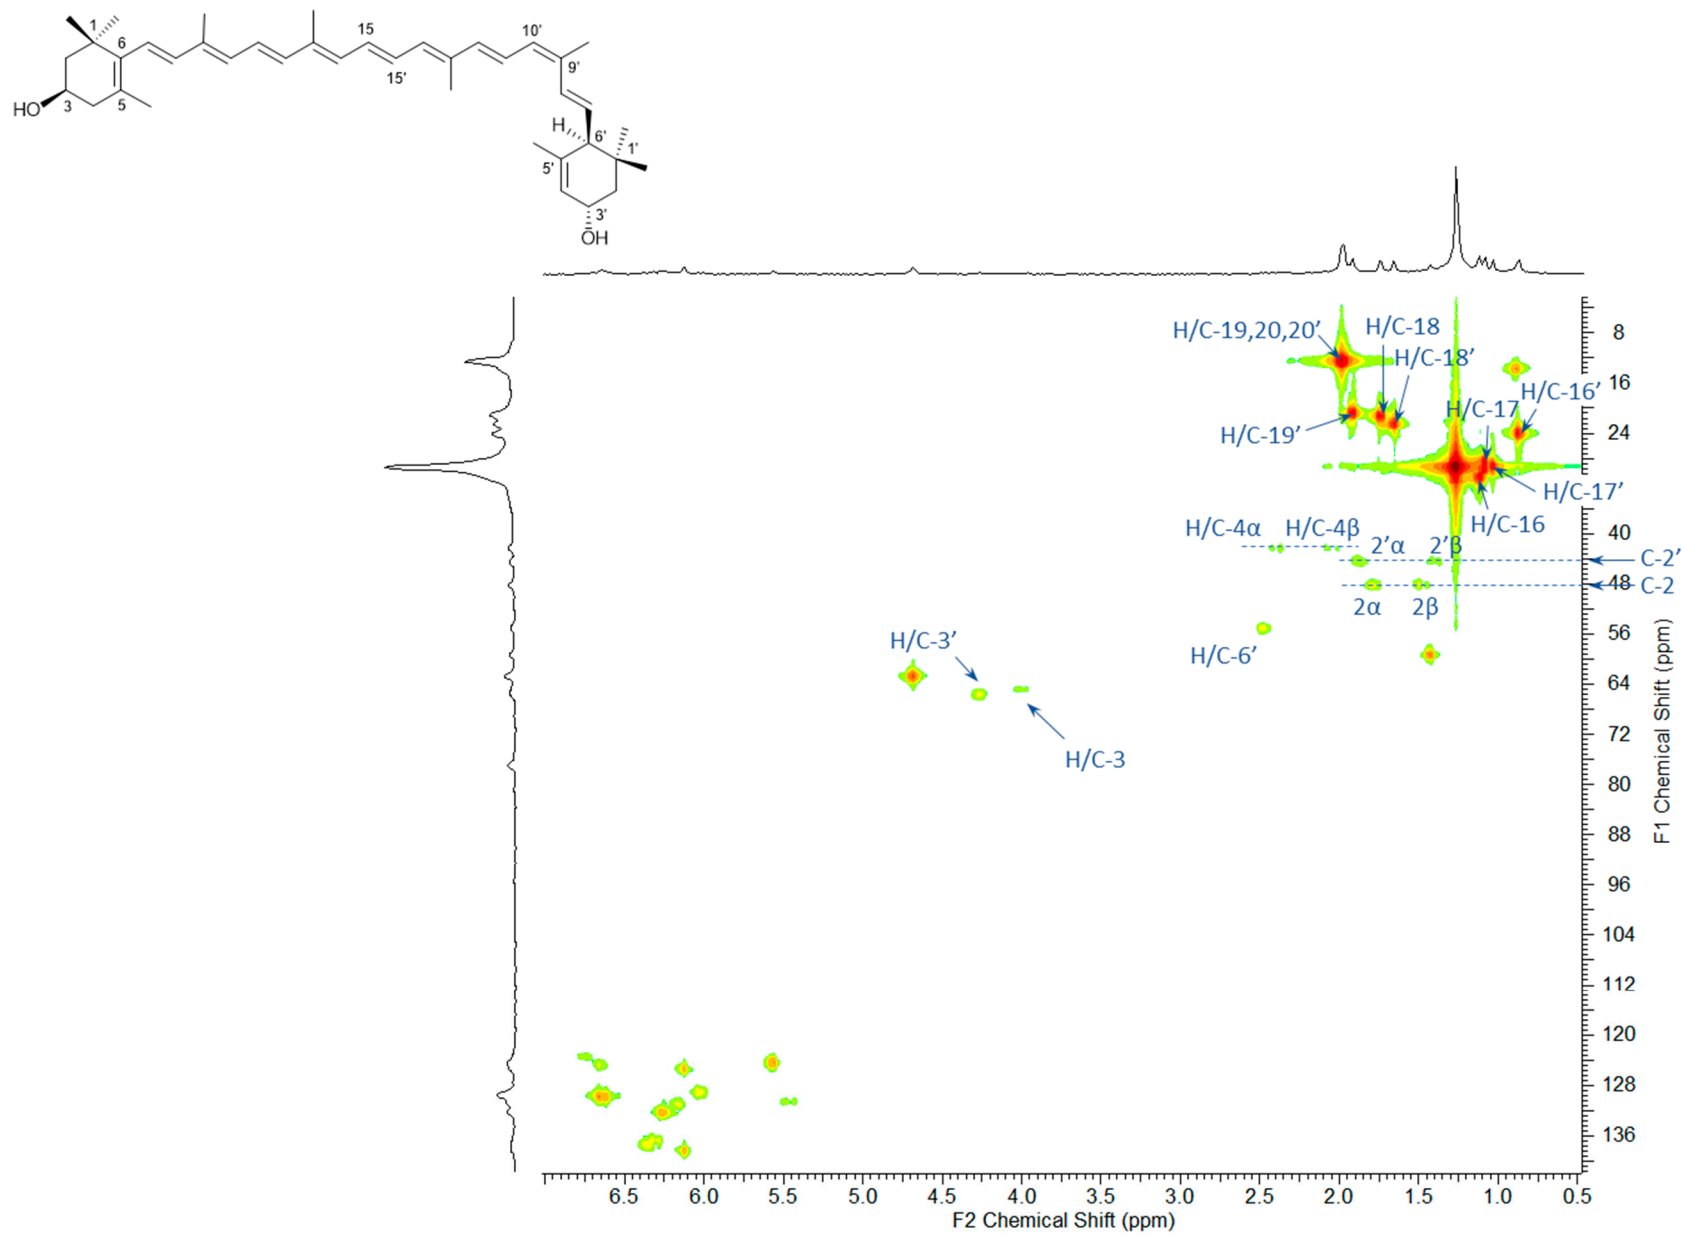

**Figure S2.19.**  $^{13}\text{C}$ - $^1\text{H}$ -HSQC spectrum of (9'Z)-lutein in  $\text{CDCl}_3$ , (500/125 MHz for  $^1\text{H}/^{13}\text{C}$ )

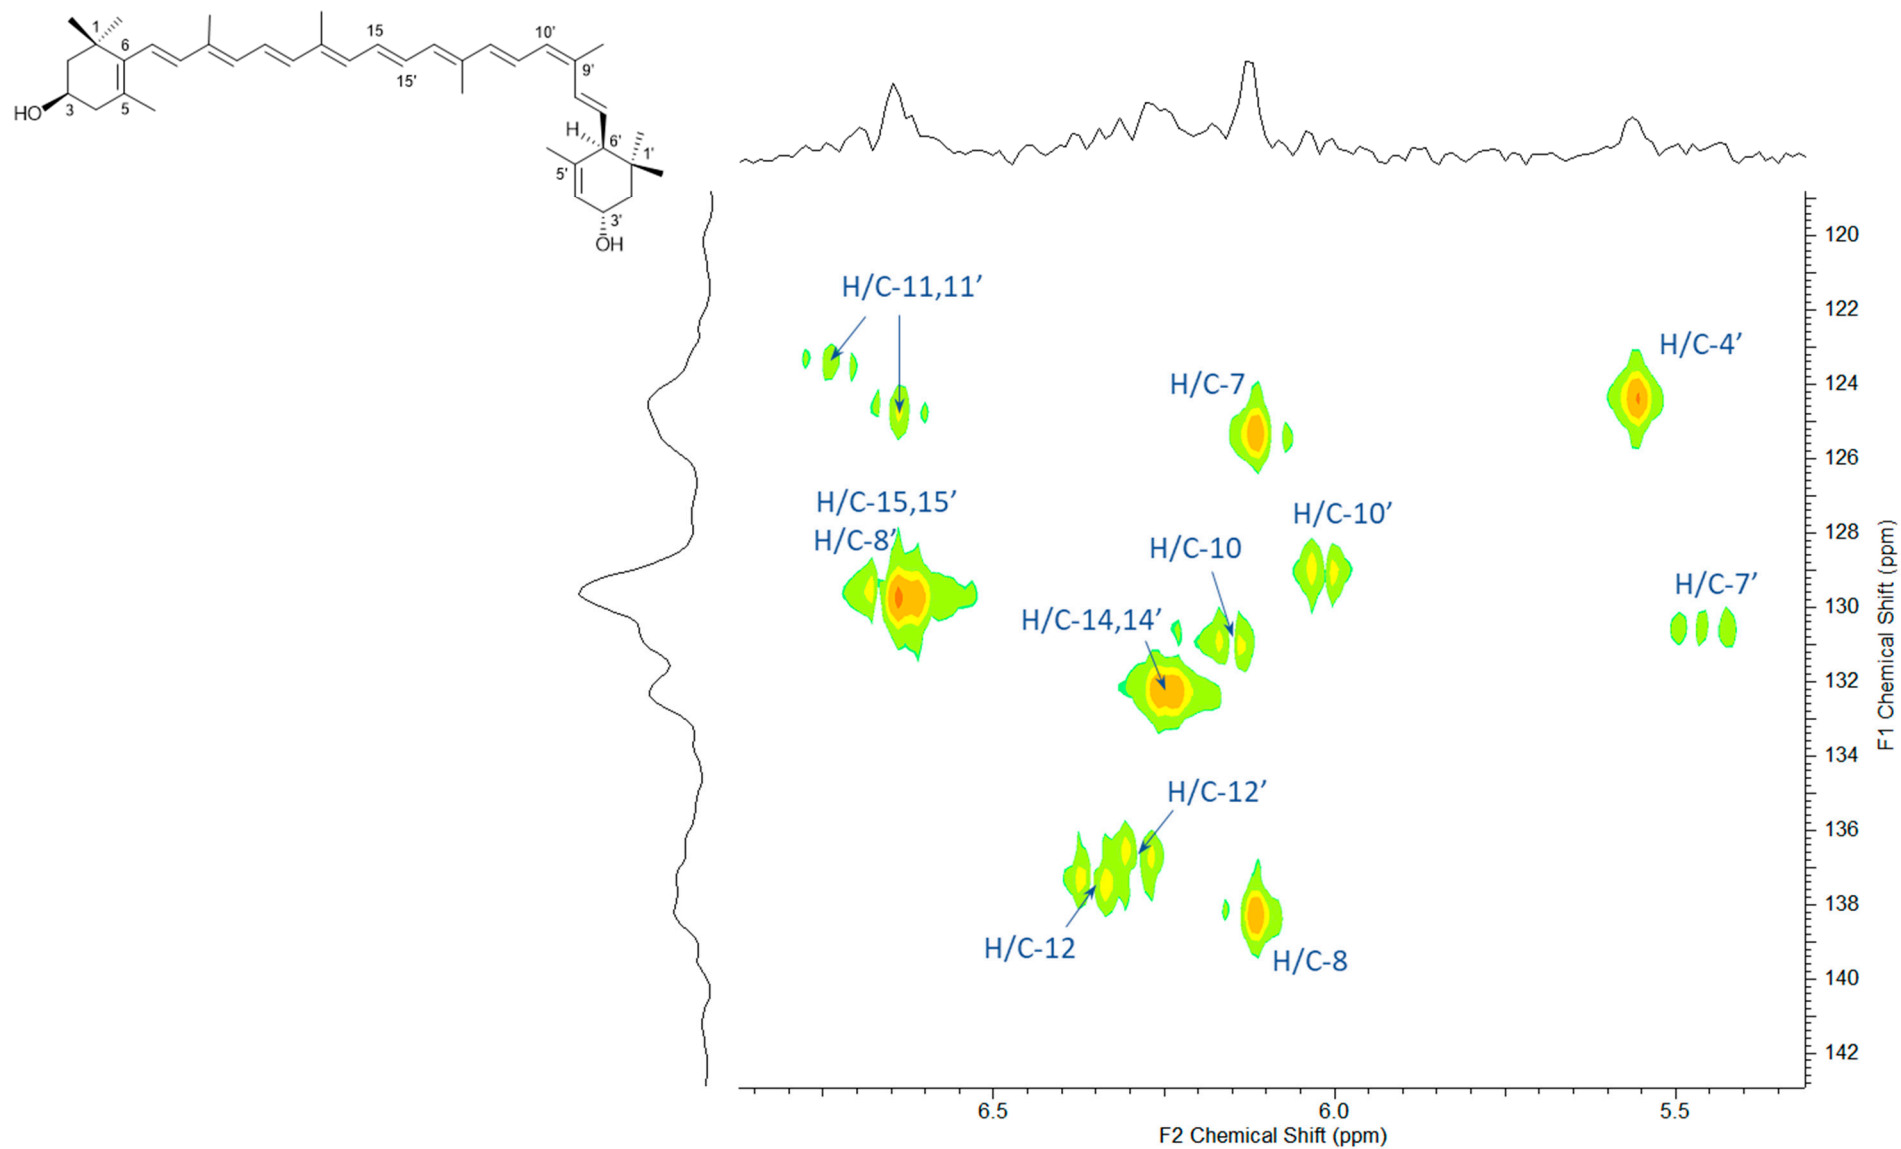

**Figure S2.20.**  $^{13}\text{C}$ - $^1\text{H}$ -HSQC spectrum of (9'Z)-lutein in  $\text{CDCl}_3$ , (500/125 MHz for  $^1\text{H}/^{13}\text{C}$ )

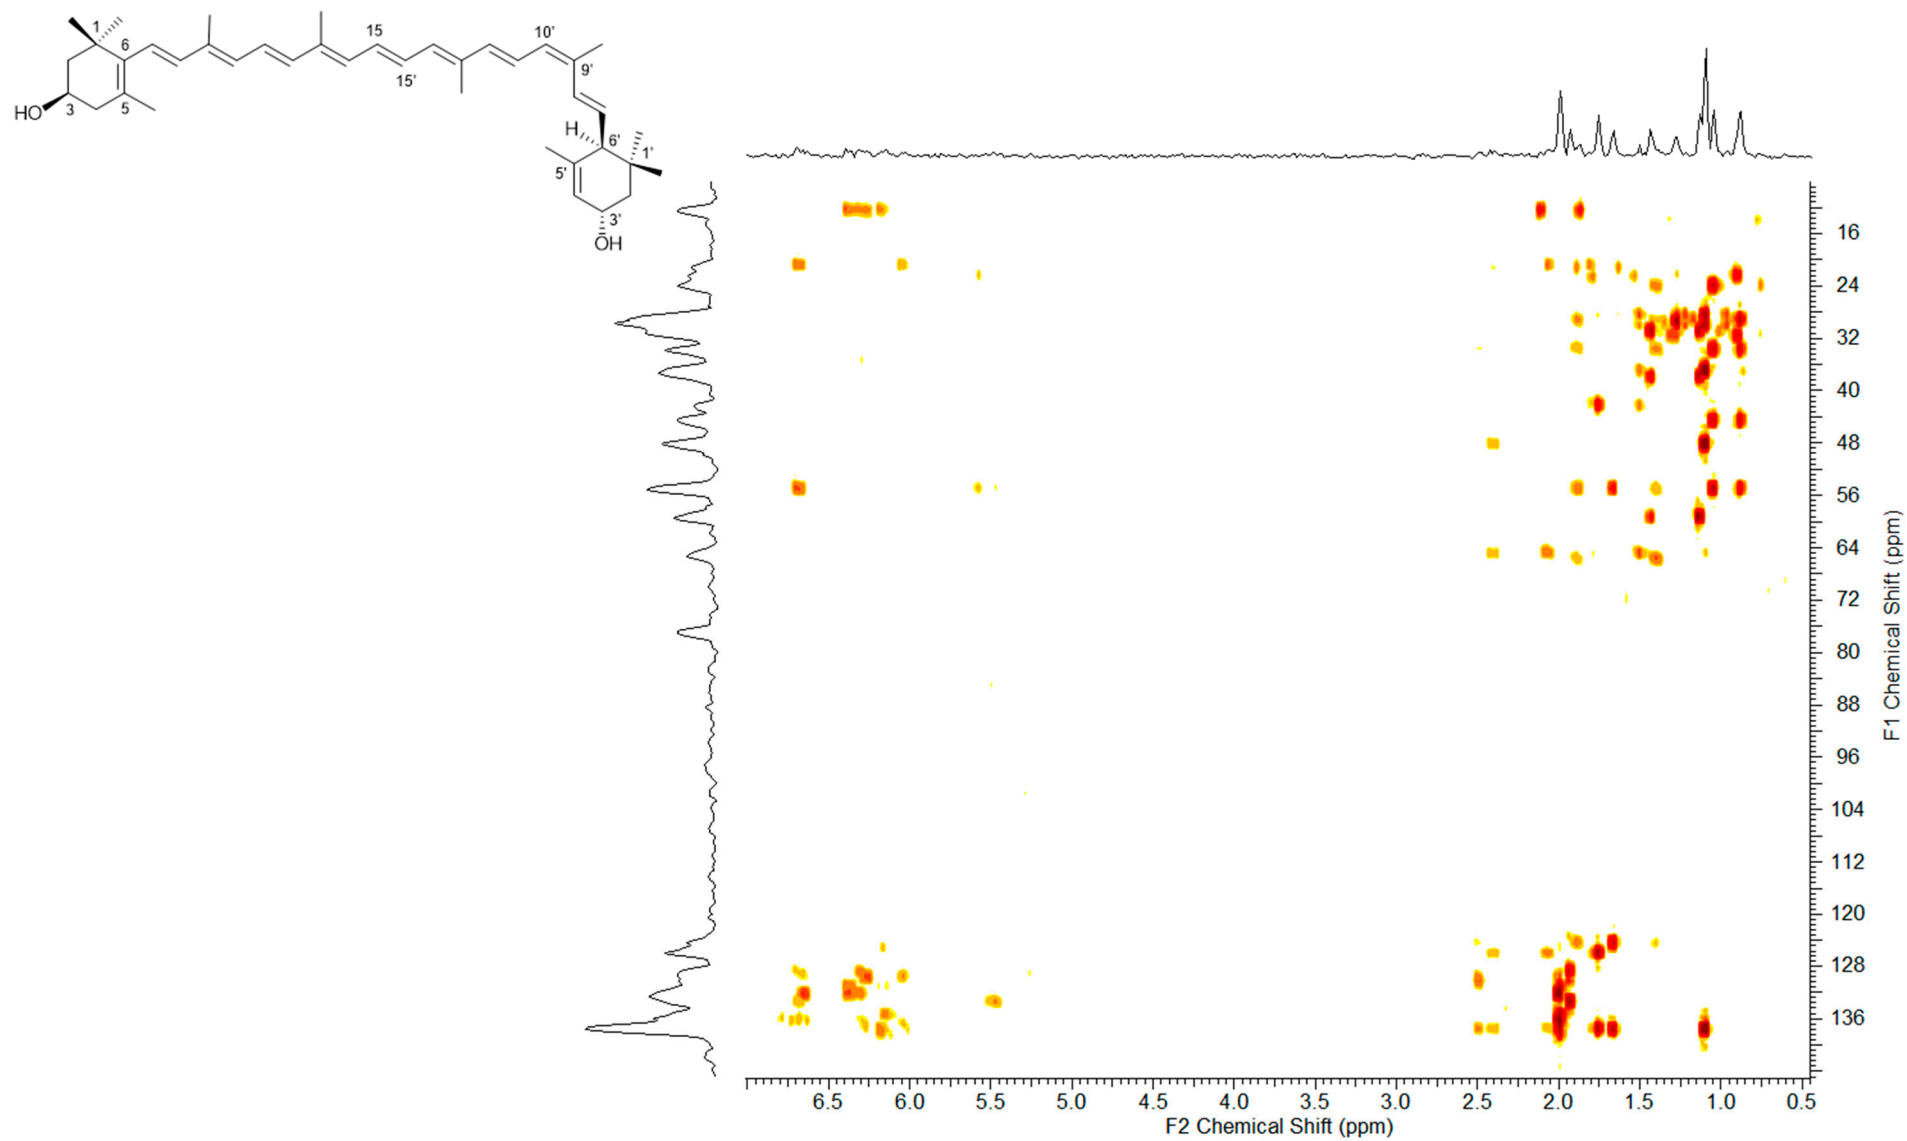

**Figure S2.21.**  $^{13}\text{C}$ - $^1\text{H}$ -HMBC spectrum of (9'Z)-lutein in  $\text{CDCl}_3$ , (500/125 MHz for  $^1\text{H}/^{13}\text{C}$ )

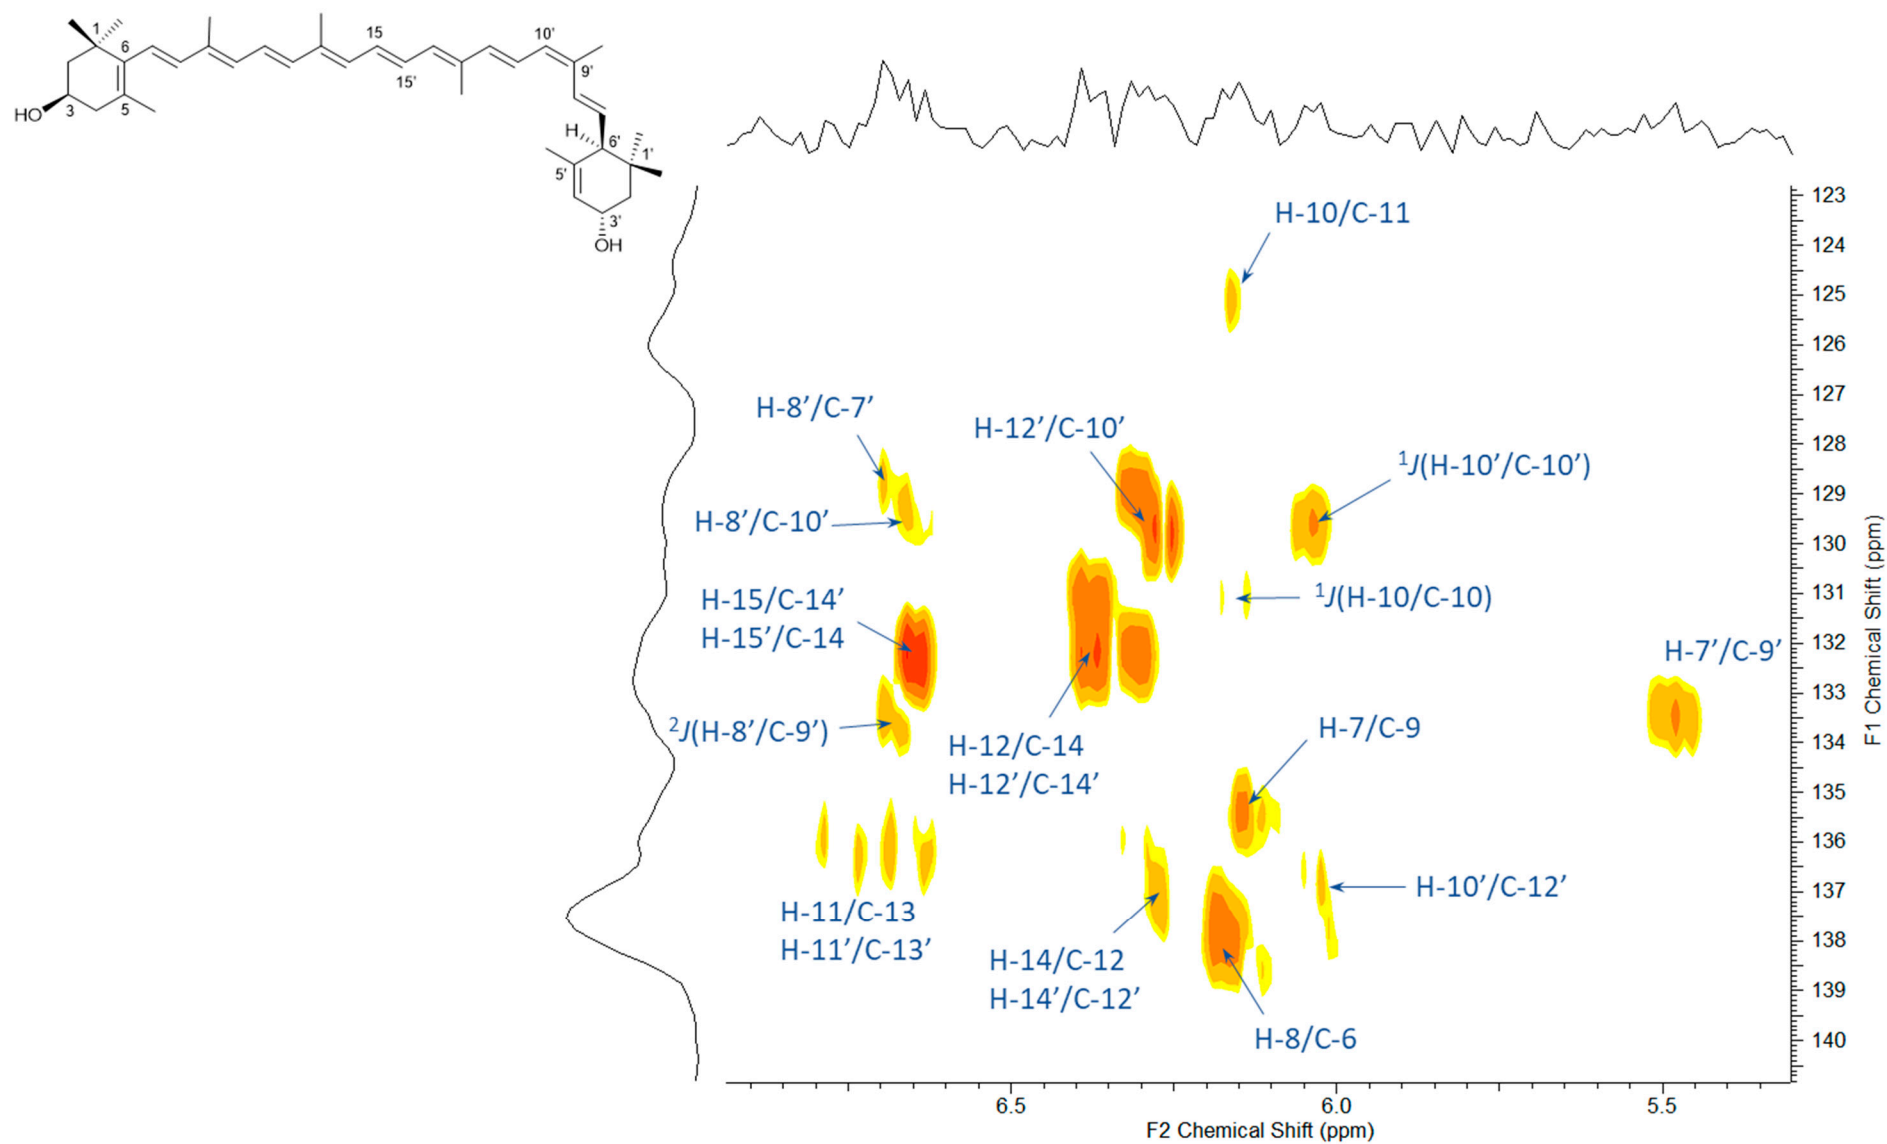

**Figure S2.22.** <sup>13</sup>C-<sup>1</sup>H-HMBC spectrum of (9'*Z*)-lutein in CDCl<sub>3</sub>, (500/125 MHz for <sup>1</sup>H/<sup>13</sup>C)

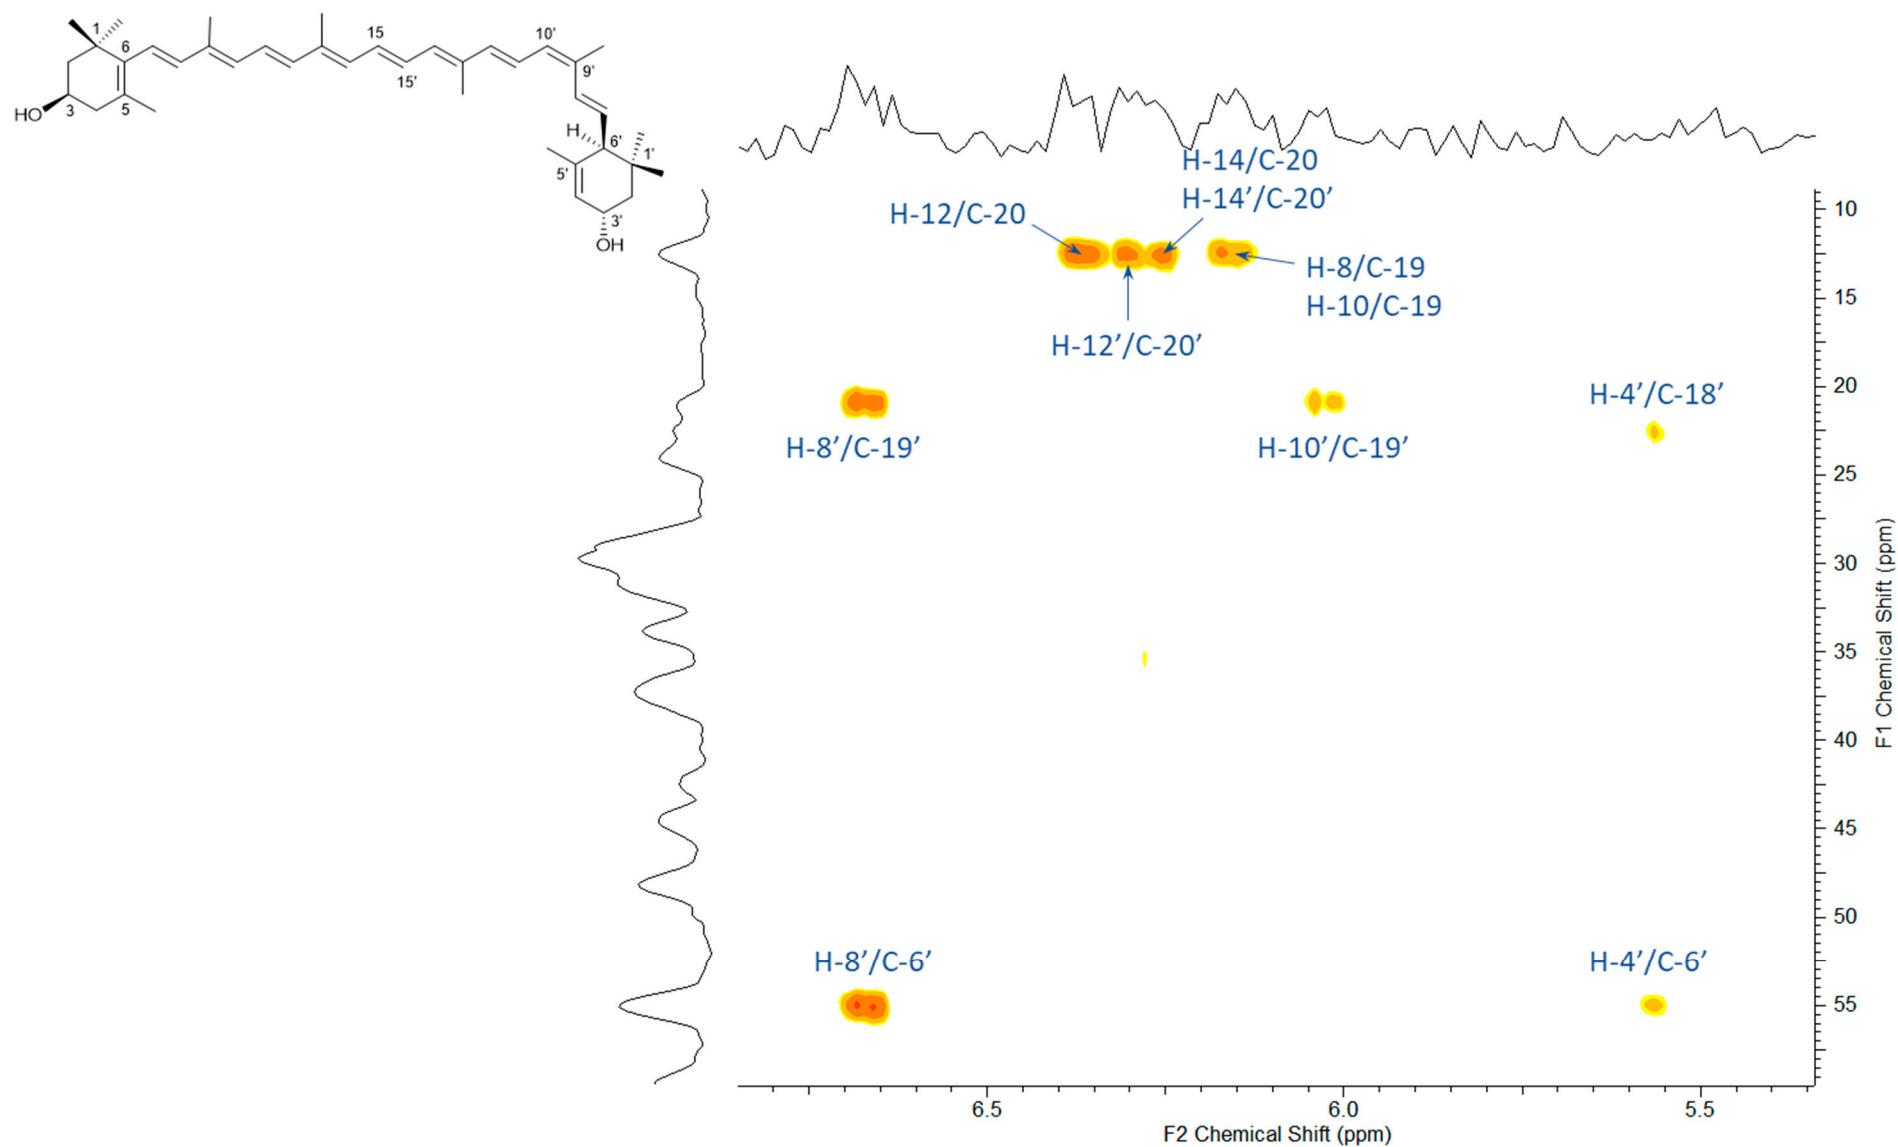

**Figure S2.23.**  $^{13}\text{C}$ - $^1\text{H}$ -HMBC spectrum of (9'Z)-lutein in  $\text{CDCl}_3$ , (500/125 MHz for  $^1\text{H}/^{13}\text{C}$ )

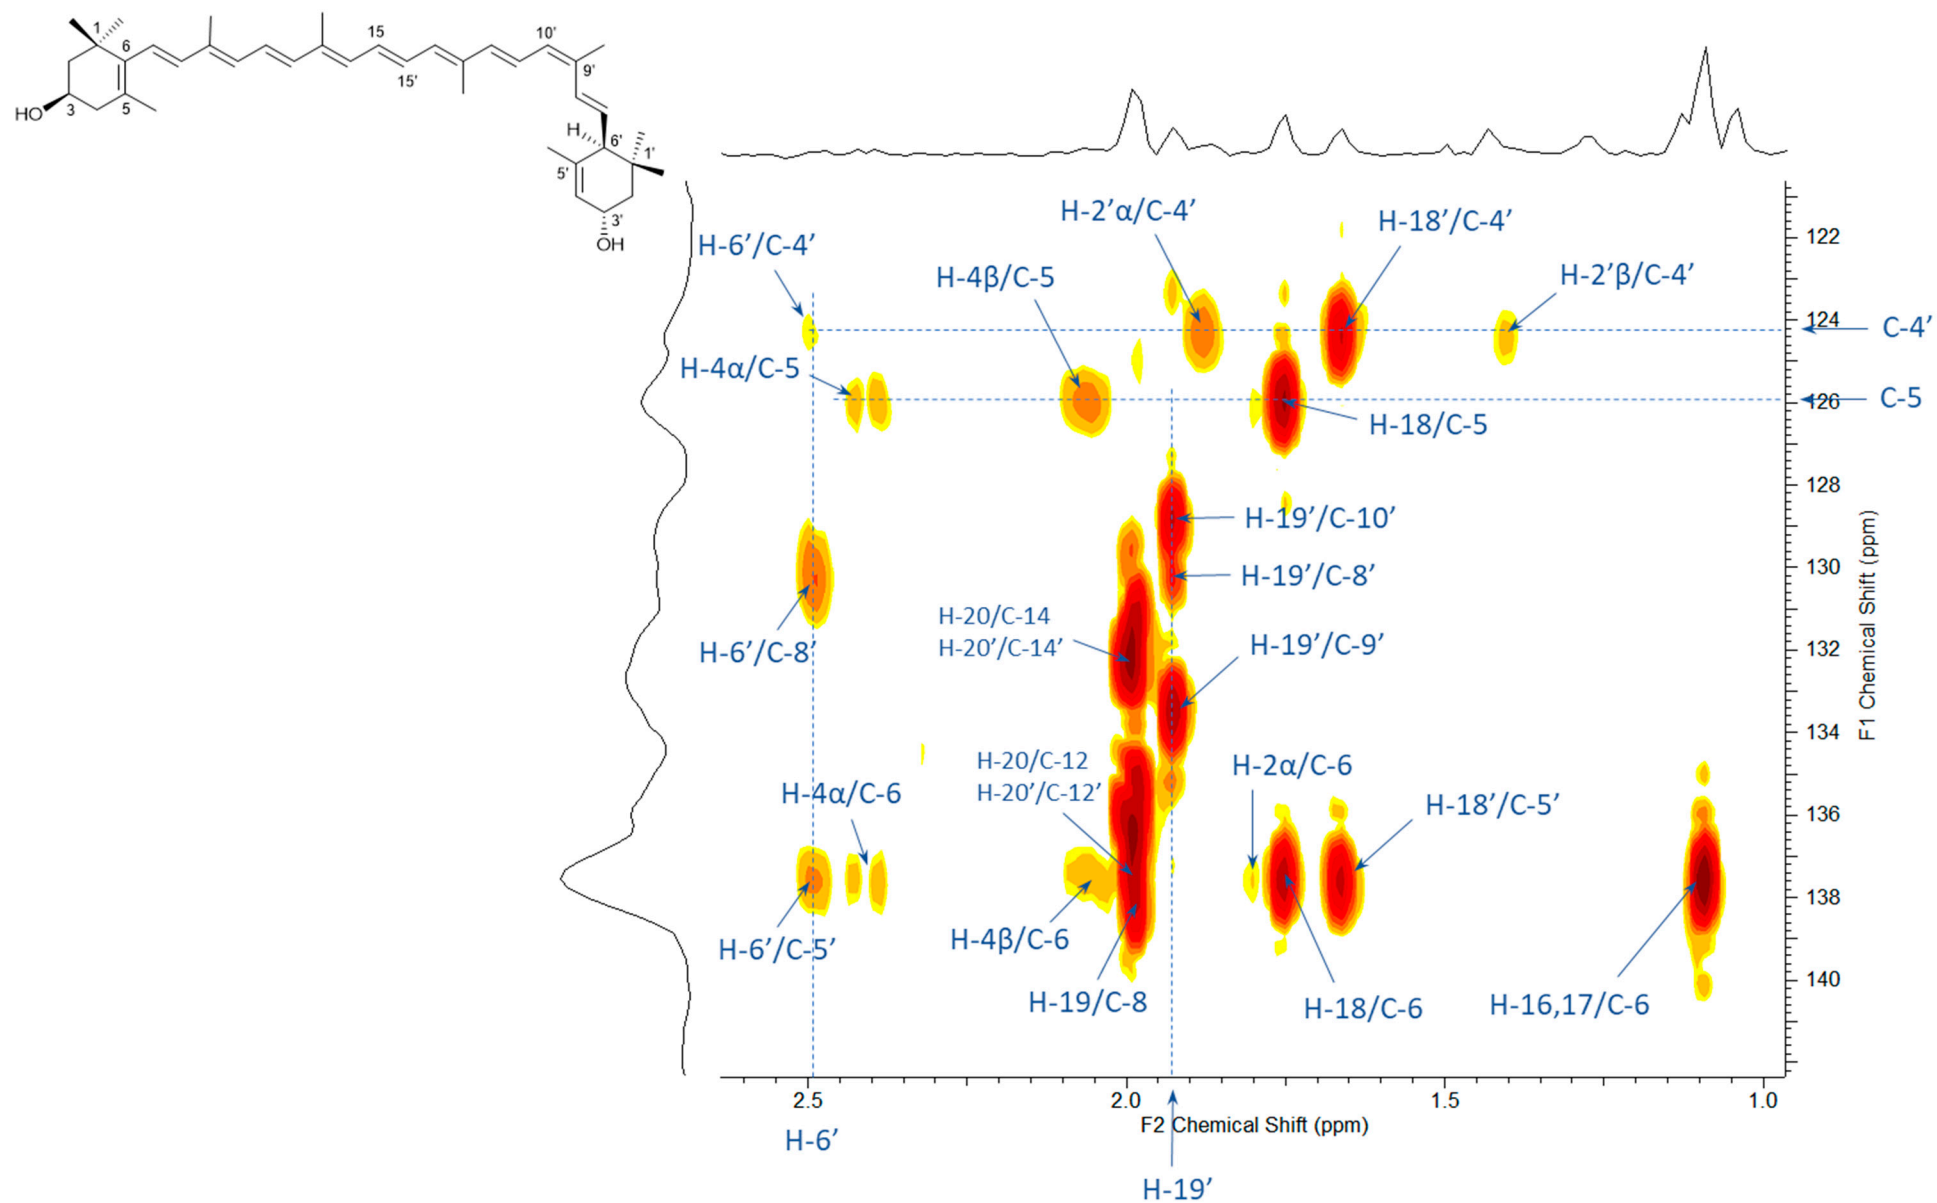

**Figure S2.24.**  $^{13}\text{C}$ - $^1\text{H}$ -HMBC spectrum of (9'Z)-lutein in  $\text{CDCl}_3$ , (500/125 MHz for  $^1\text{H}/^{13}\text{C}$ )

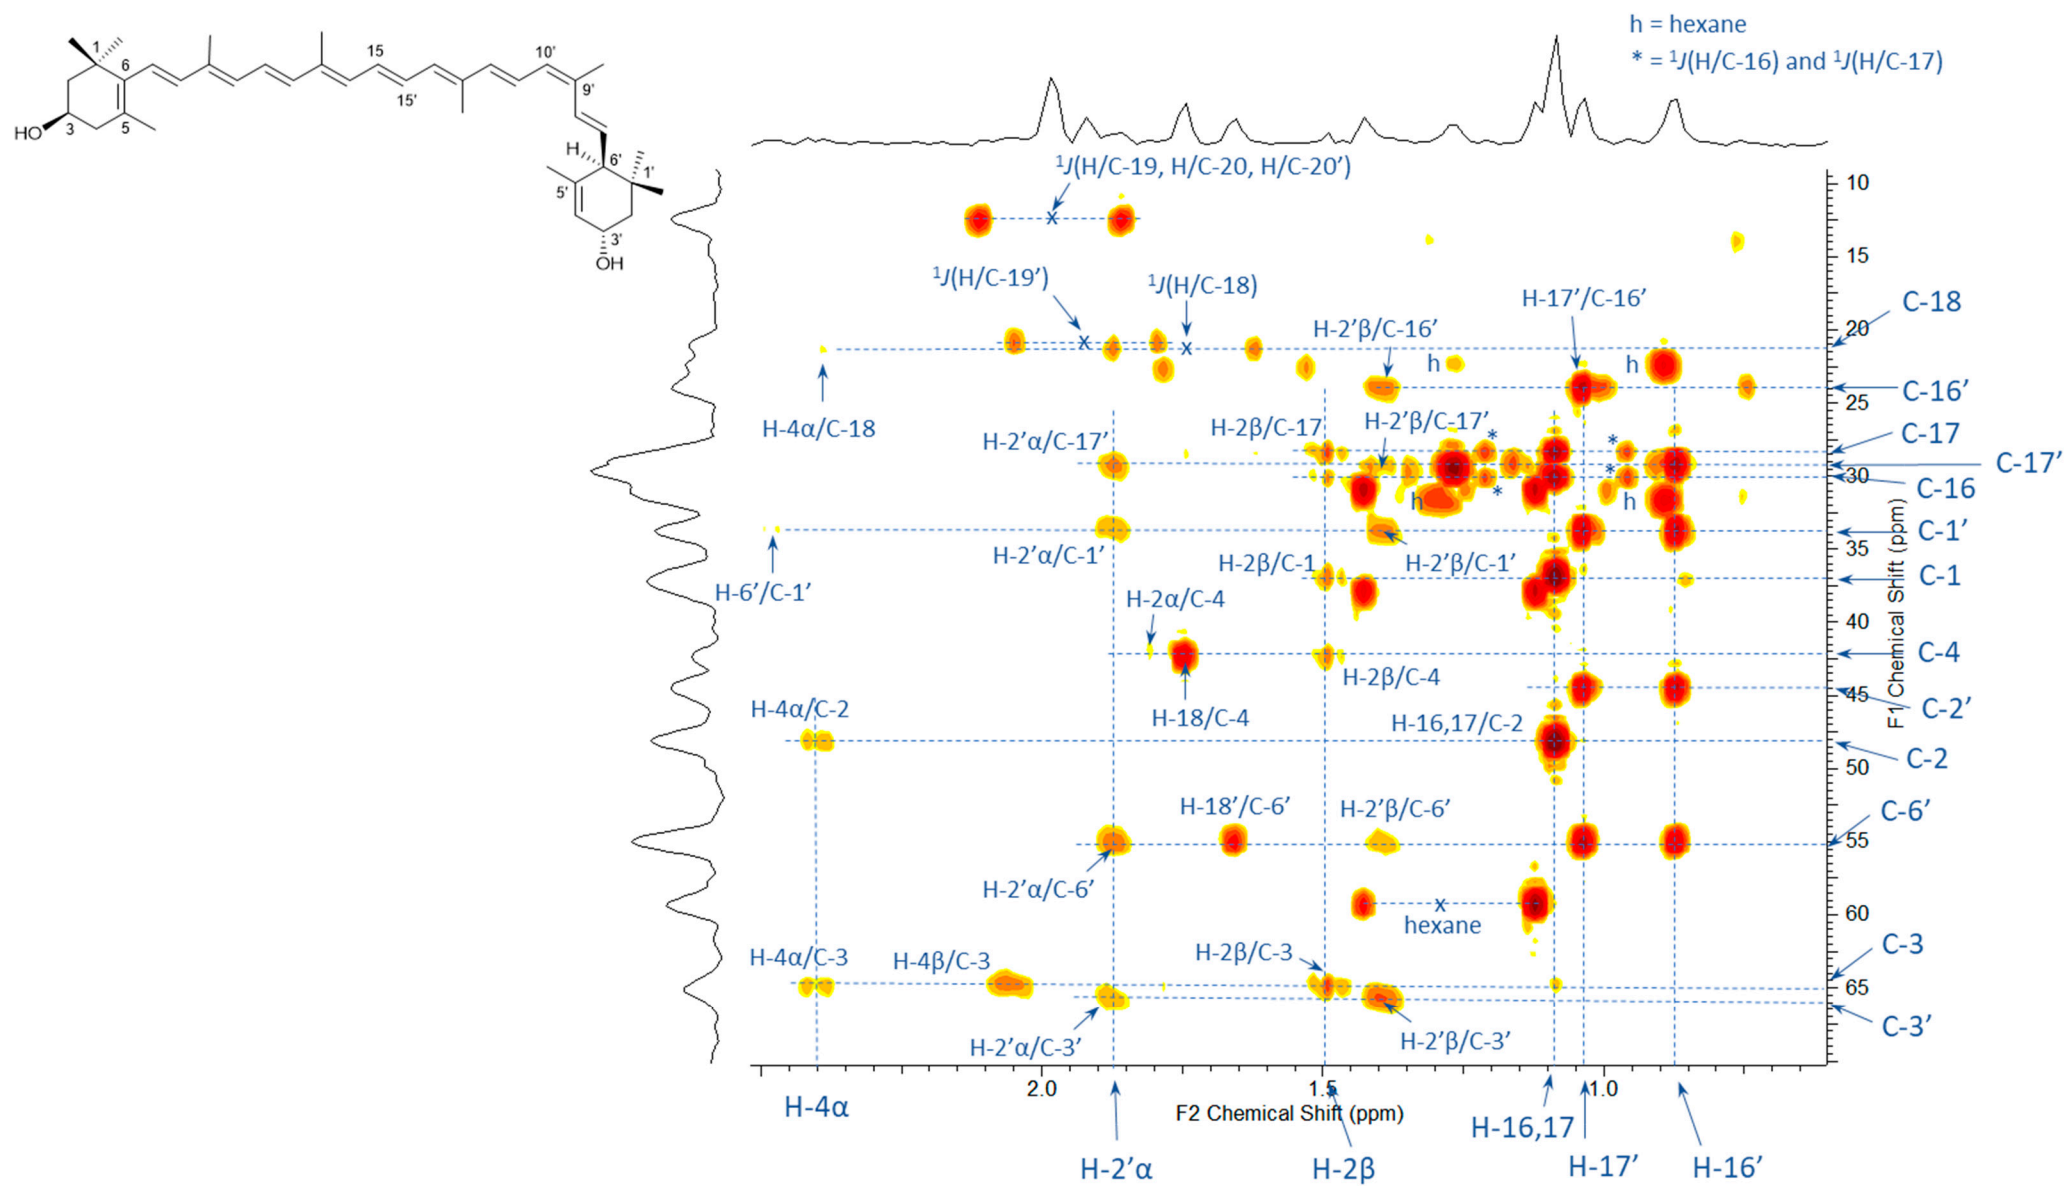

**Figure S2.25.**  $^{13}\text{C}$ - $^1\text{H}$ -HMBC spectrum of (9'Z)-lutein in  $\text{CDCl}_3$ , (500/125 MHz for  $^1\text{H}/^{13}\text{C}$ )

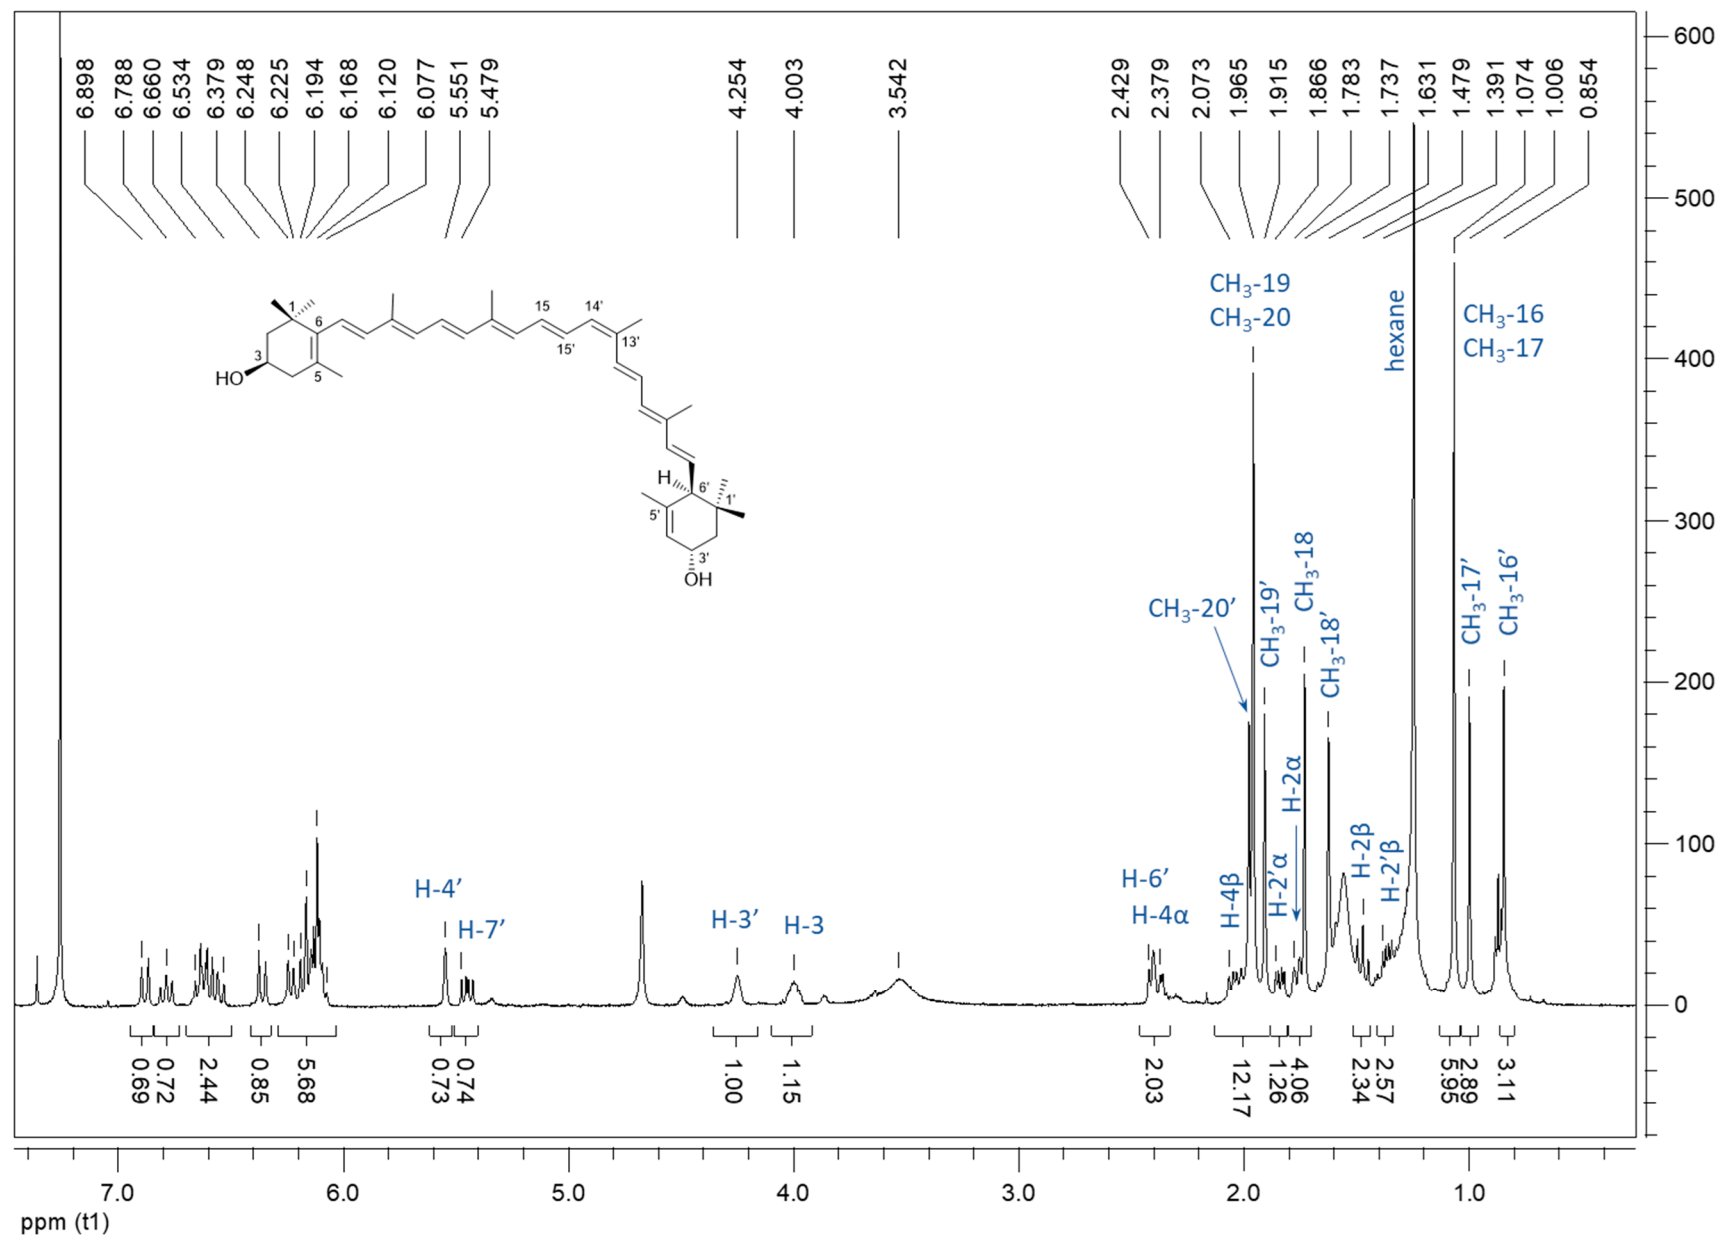

**Figure S2.26.**  $^1\text{H}$ -NMR spectrum of (13'Z)-lutein in  $\text{CDCl}_3$ , (500/125 MHz for  $^1\text{H}/^{13}\text{C}$ )



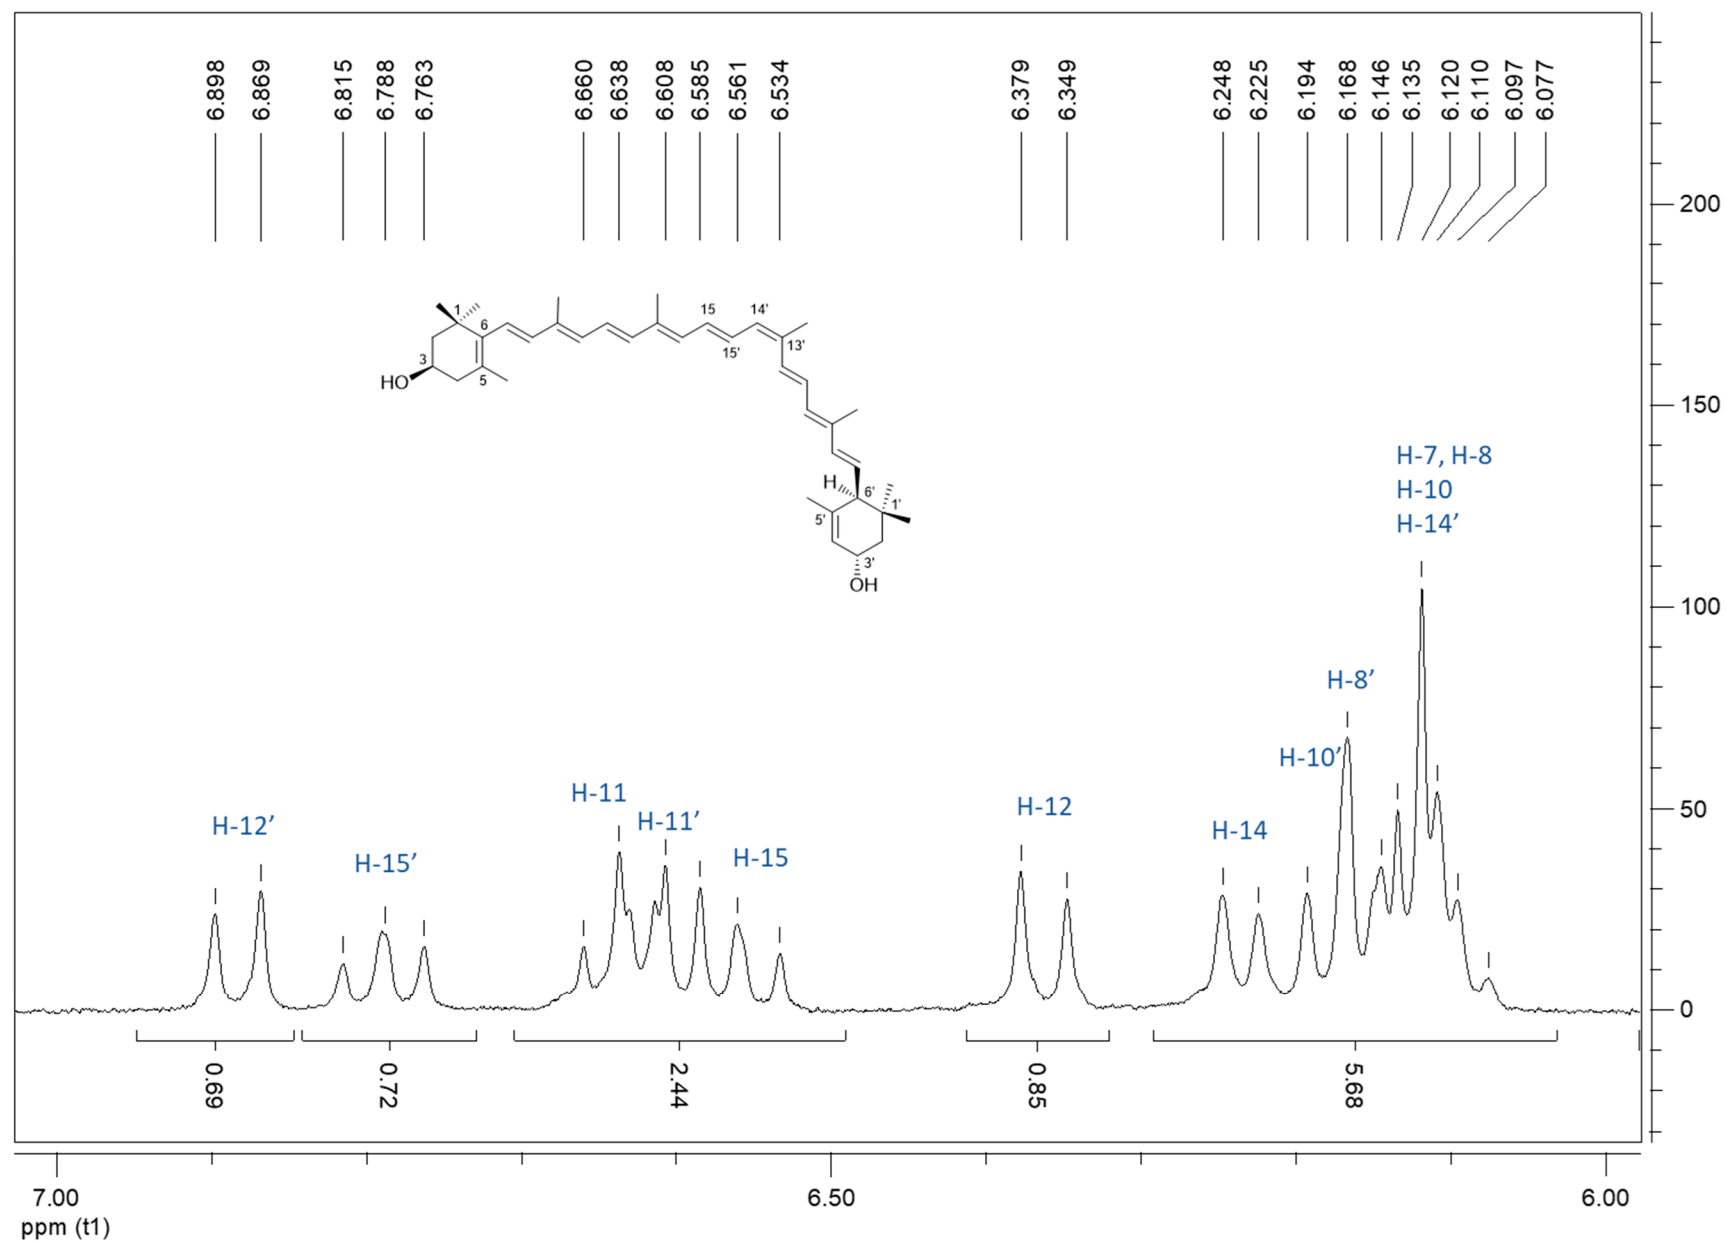

**Figure S2.27.**  $^1\text{H}$ -NMR spectrum of (13'Z)-lutein in  $\text{CDCl}_3$ , (500/125 MHz for  $^1\text{H}/^{13}\text{C}$ )

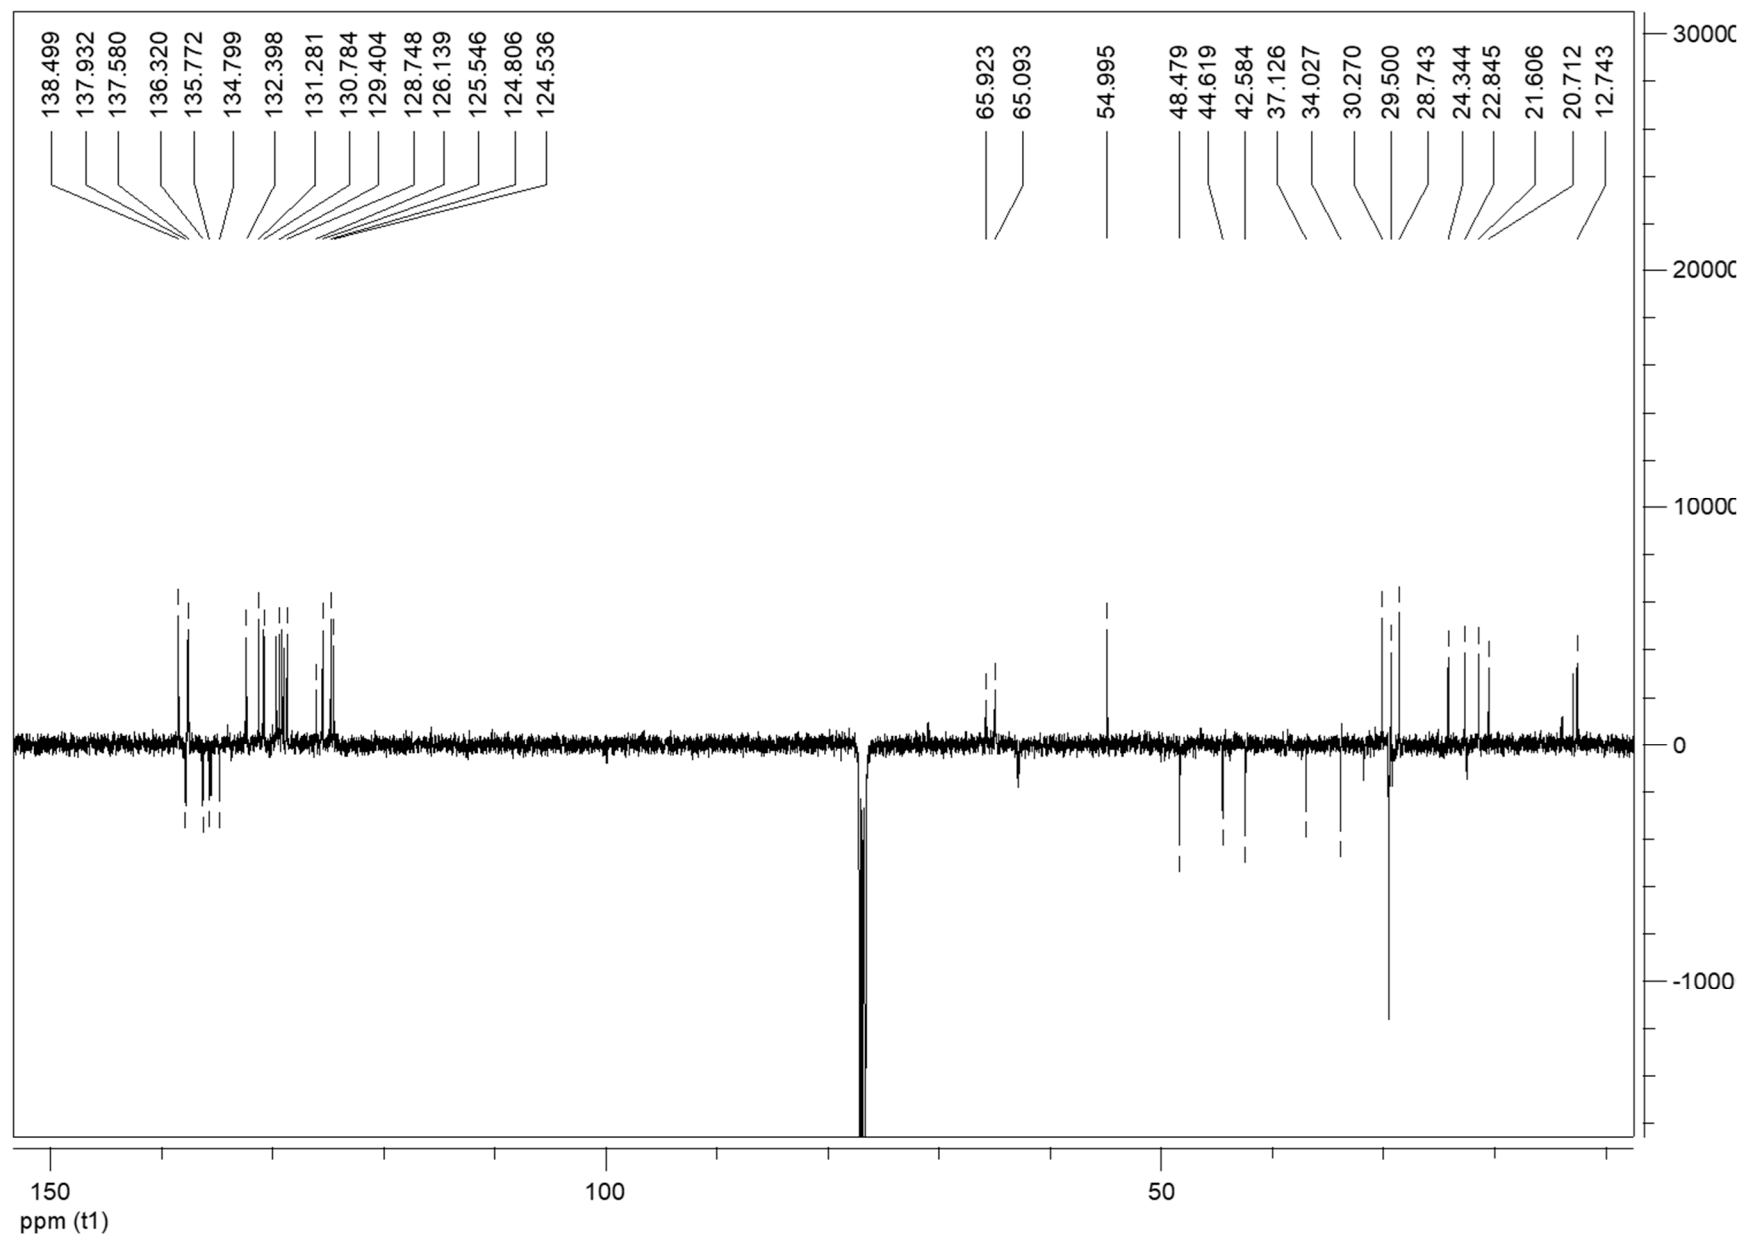

**Figure S2.28.** <sup>13</sup>C-NMR spectrum of (13'Z)-lutein in CDCl<sub>3</sub>, (500/125 MHz for <sup>1</sup>H/<sup>13</sup>C)

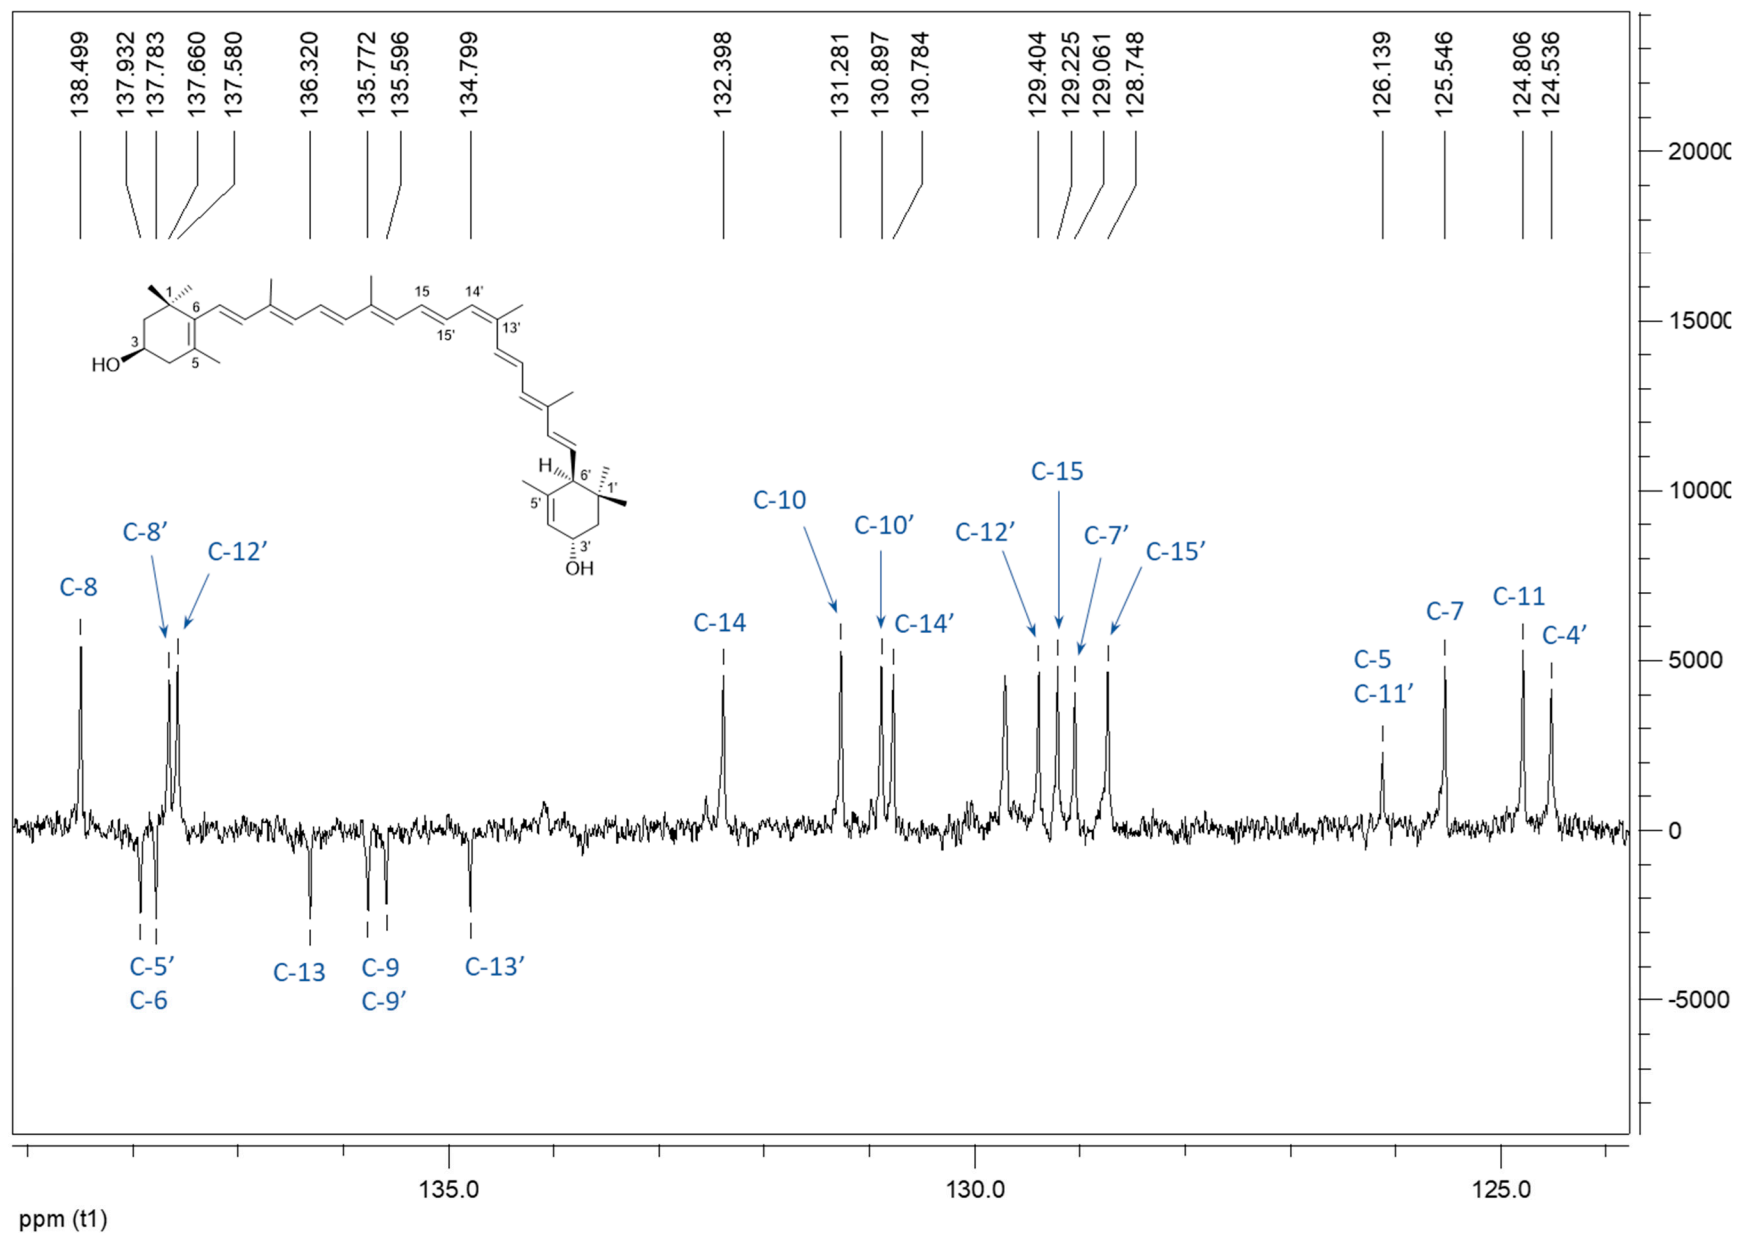

**Figure S2.29.**  $^{13}\text{C}$ -NMR spectrum of (13'Z)-lutein in  $\text{CDCl}_3$ , (500/125 MHz for  $^1\text{H}/^{13}\text{C}$ )

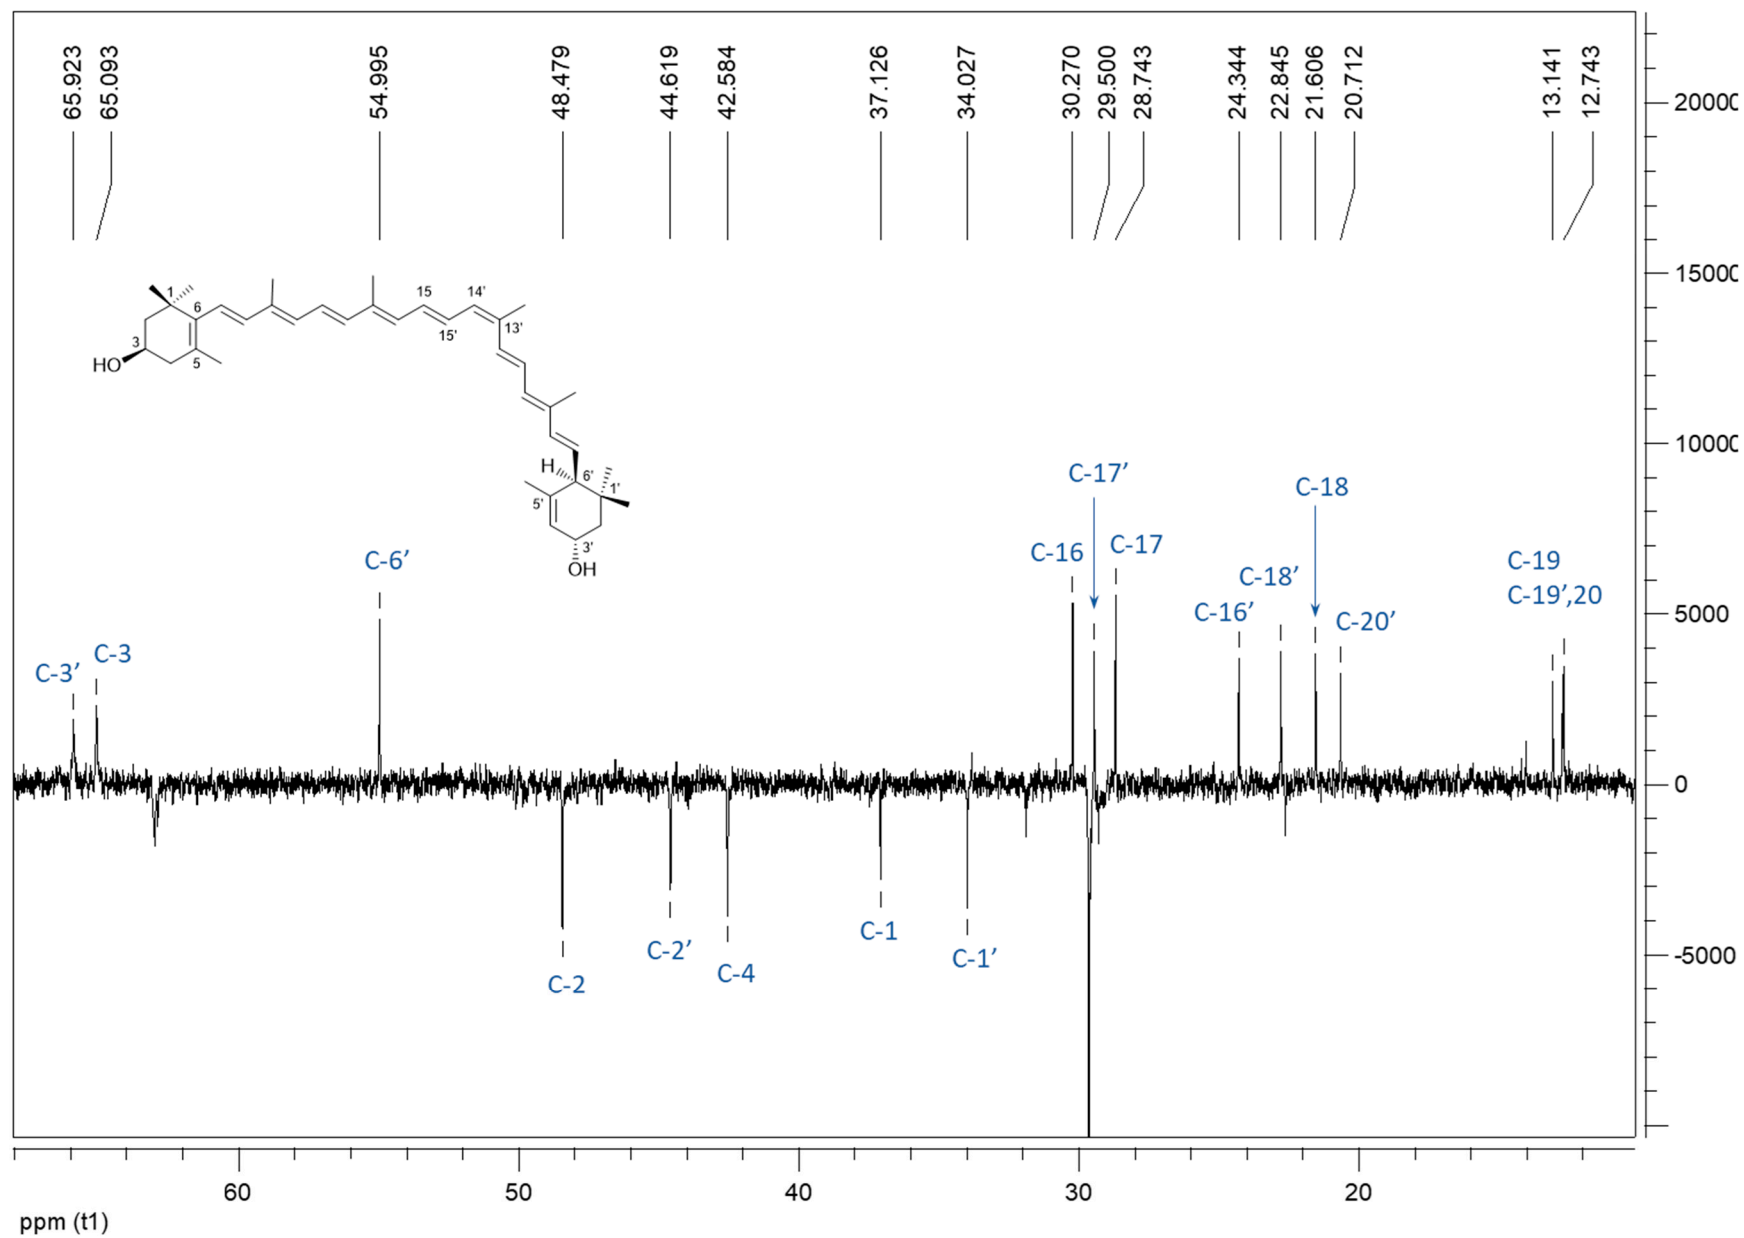

**Figure S2.30.**  $^{13}\text{C}$ -NMR spectrum of (13'Z)-lutein in  $\text{CDCl}_3$ , (500/125 MHz for  $^1\text{H}/^{13}\text{C}$ )

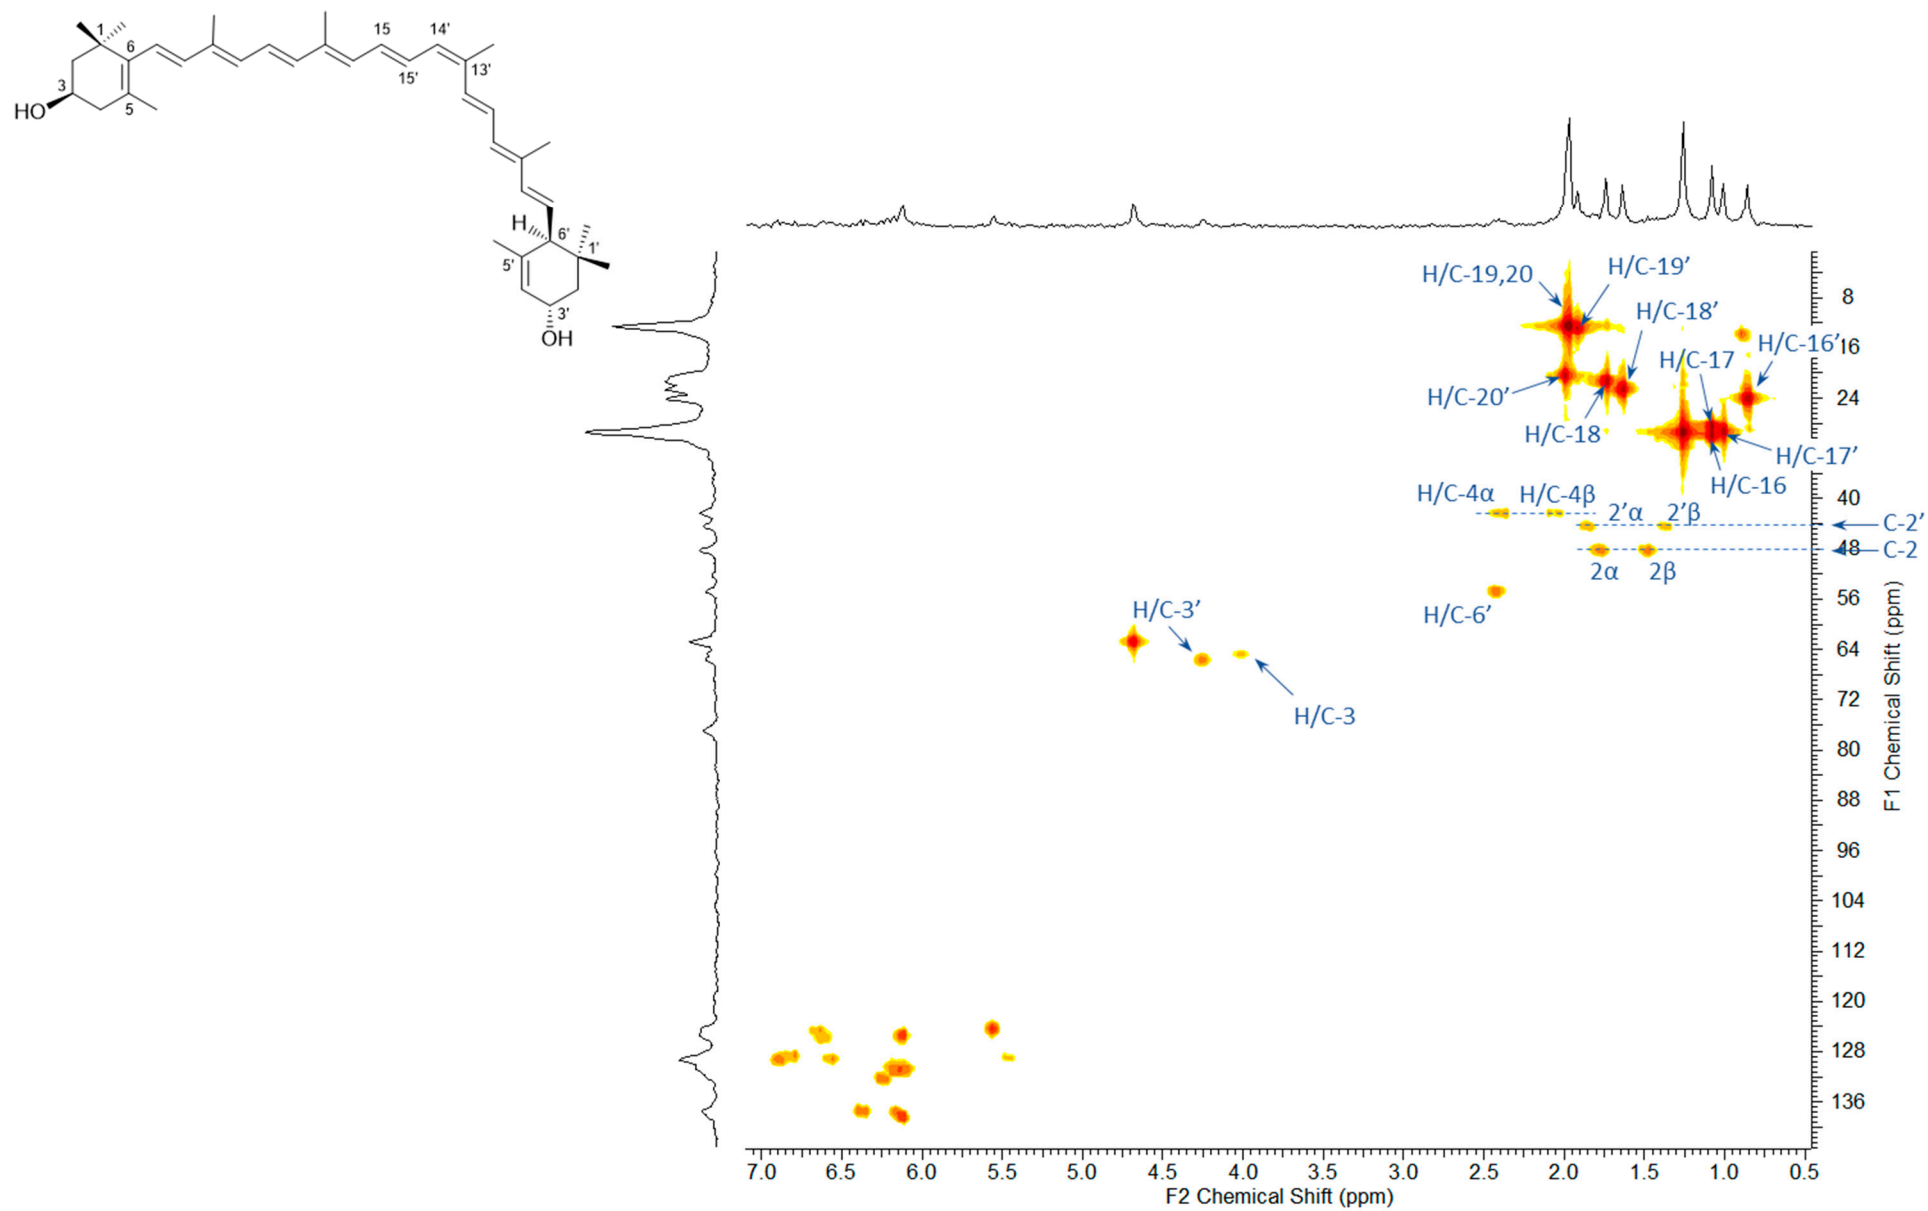

**Figure S2.31.**  $^{13}\text{C}$ - $^1\text{H}$ -HSQC spectrum of (13'Z)-lutein in  $\text{CDCl}_3$ , (500/125 MHz for  $^1\text{H}/^{13}\text{C}$ )

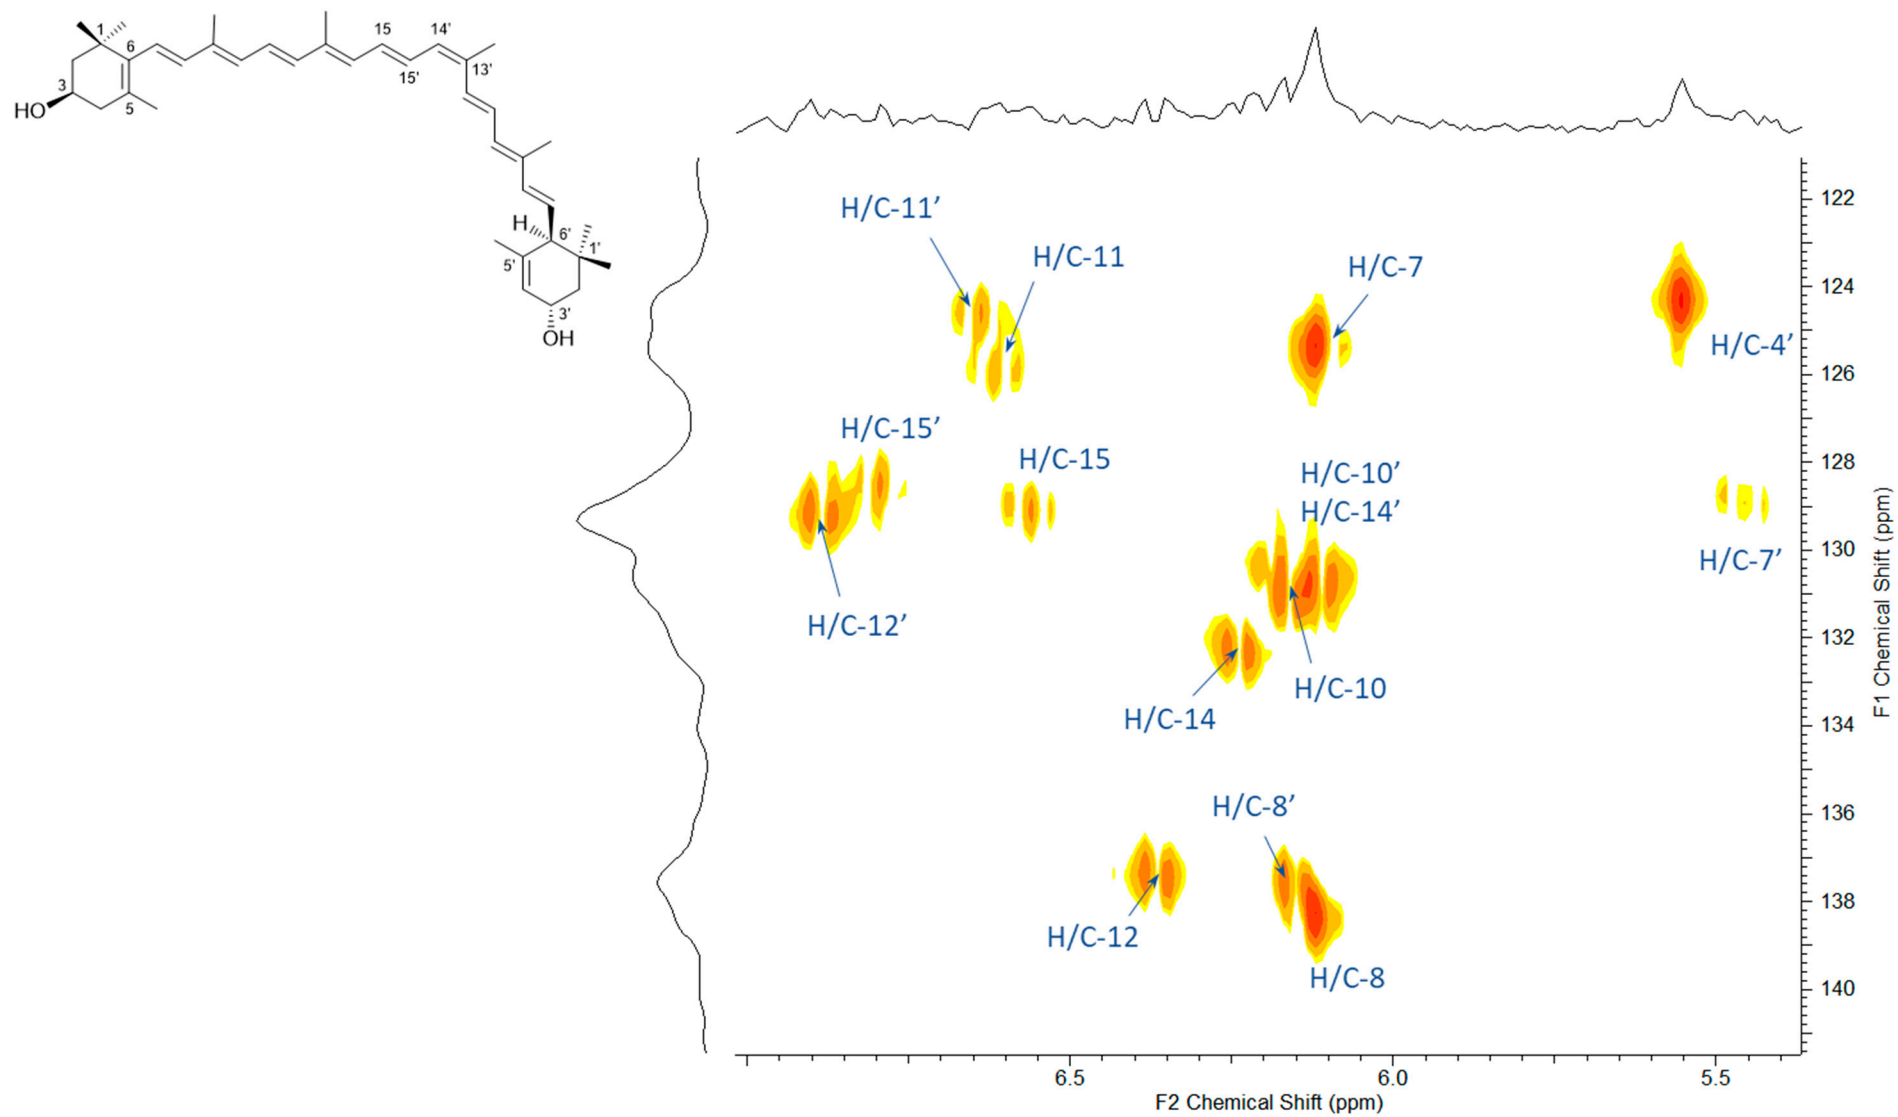

**Figure S2.32.**  $^{13}\text{C}$ - $^1\text{H}$ -HSQC spectrum of (13'Z)-lutein in  $\text{CDCl}_3$ , (500/125 MHz for  $^1\text{H}/^{13}\text{C}$ )

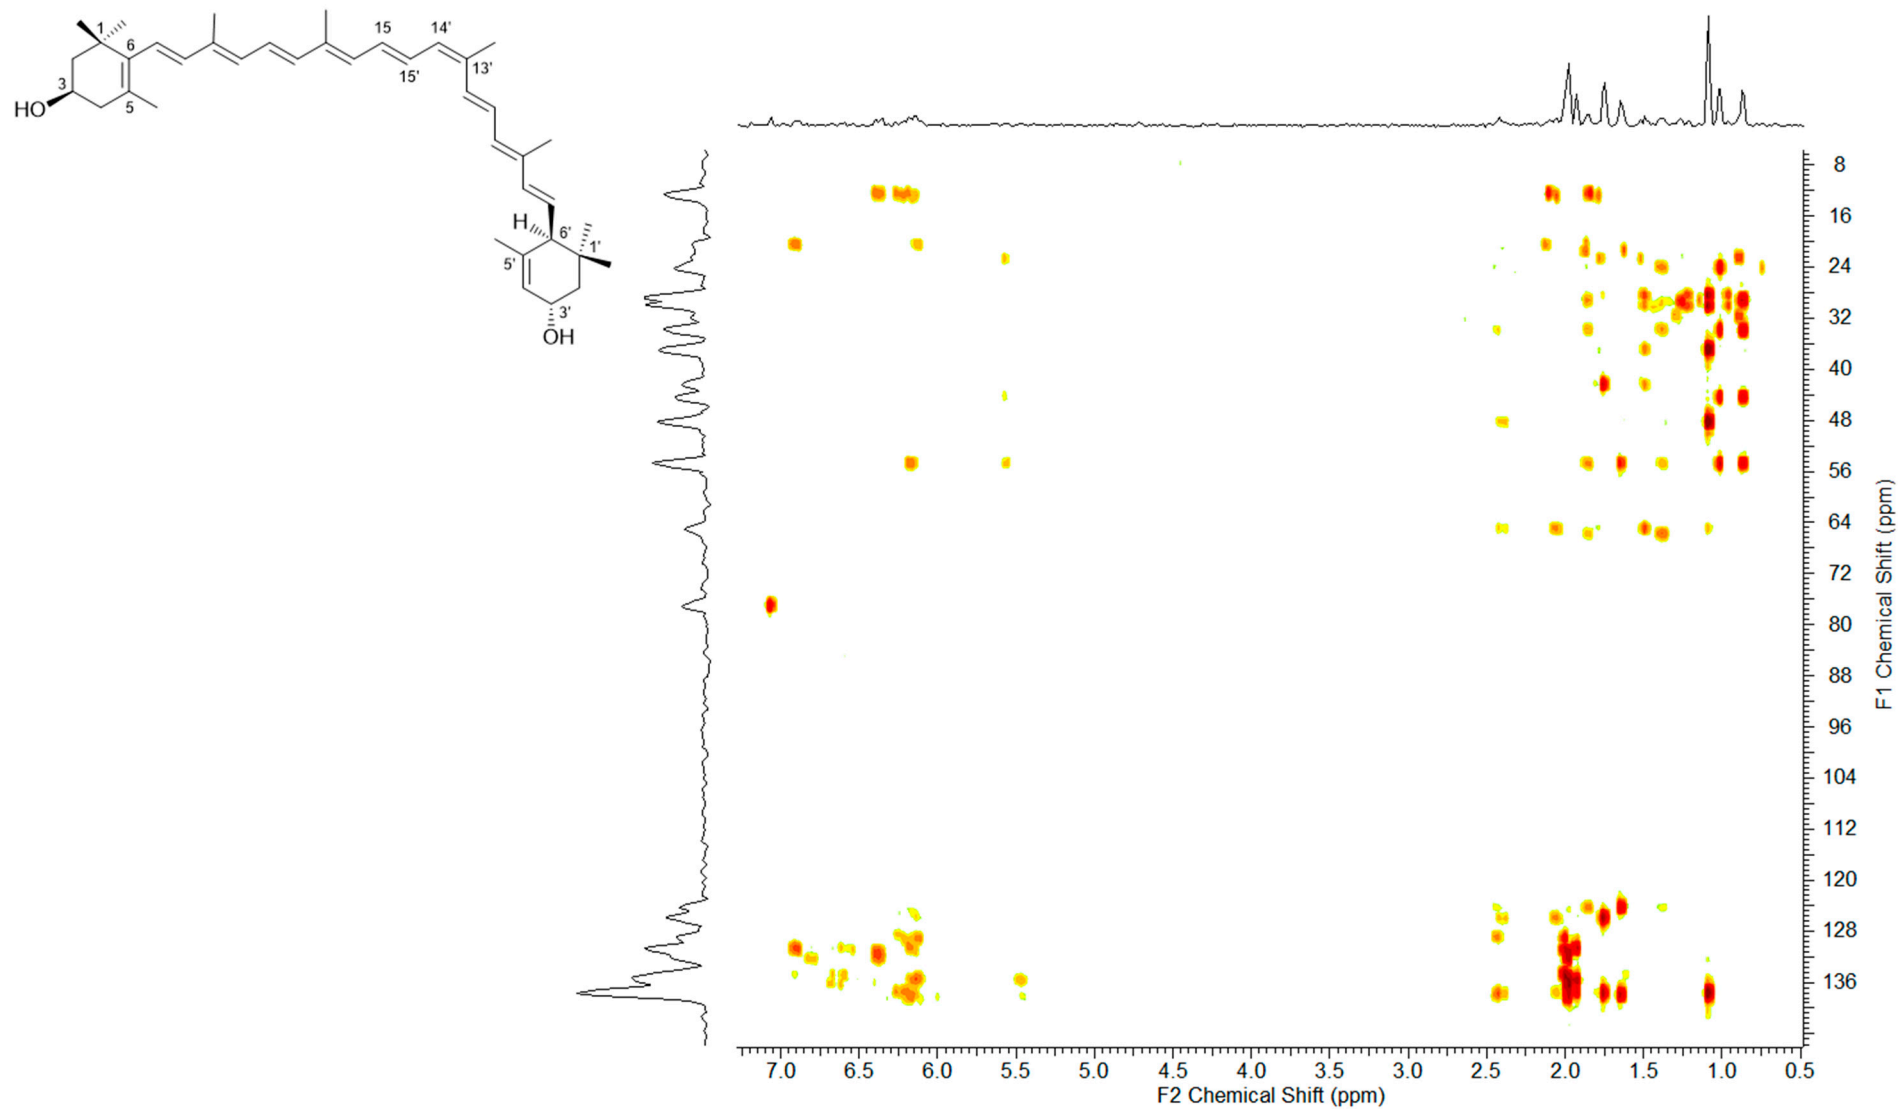

**Figure S2.33.**  $^{13}\text{C}$ - $^1\text{H}$ -HMBC spectrum of (13'Z)-lutein in  $\text{CDCl}_3$ , (500/125 MHz for  $^1\text{H}/^{13}\text{C}$ )

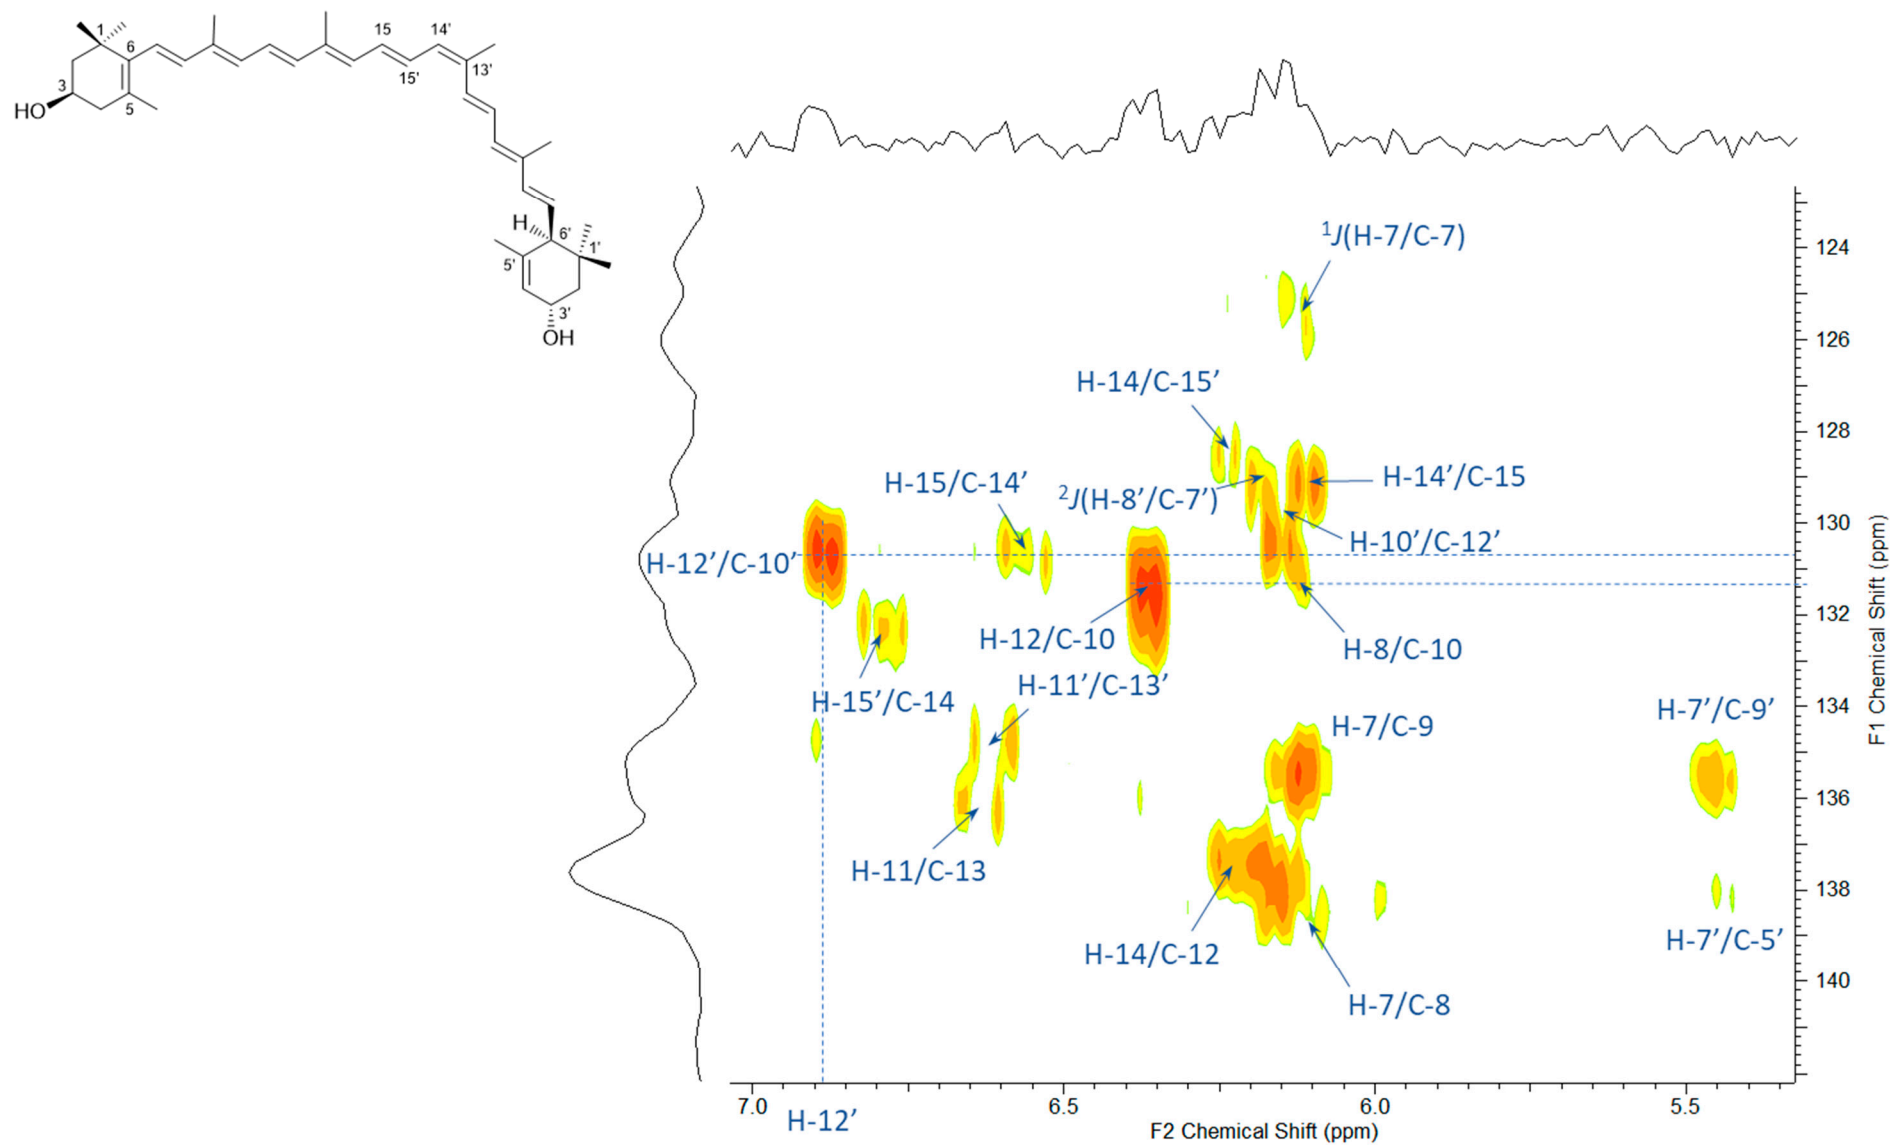

**Figure S2.34.**  $^{13}\text{C}$ - $^1\text{H}$ -HMBC spectrum of (13'Z)-lutein in  $\text{CDCl}_3$ , (500/125 MHz for  $^1\text{H}/^{13}\text{C}$ )



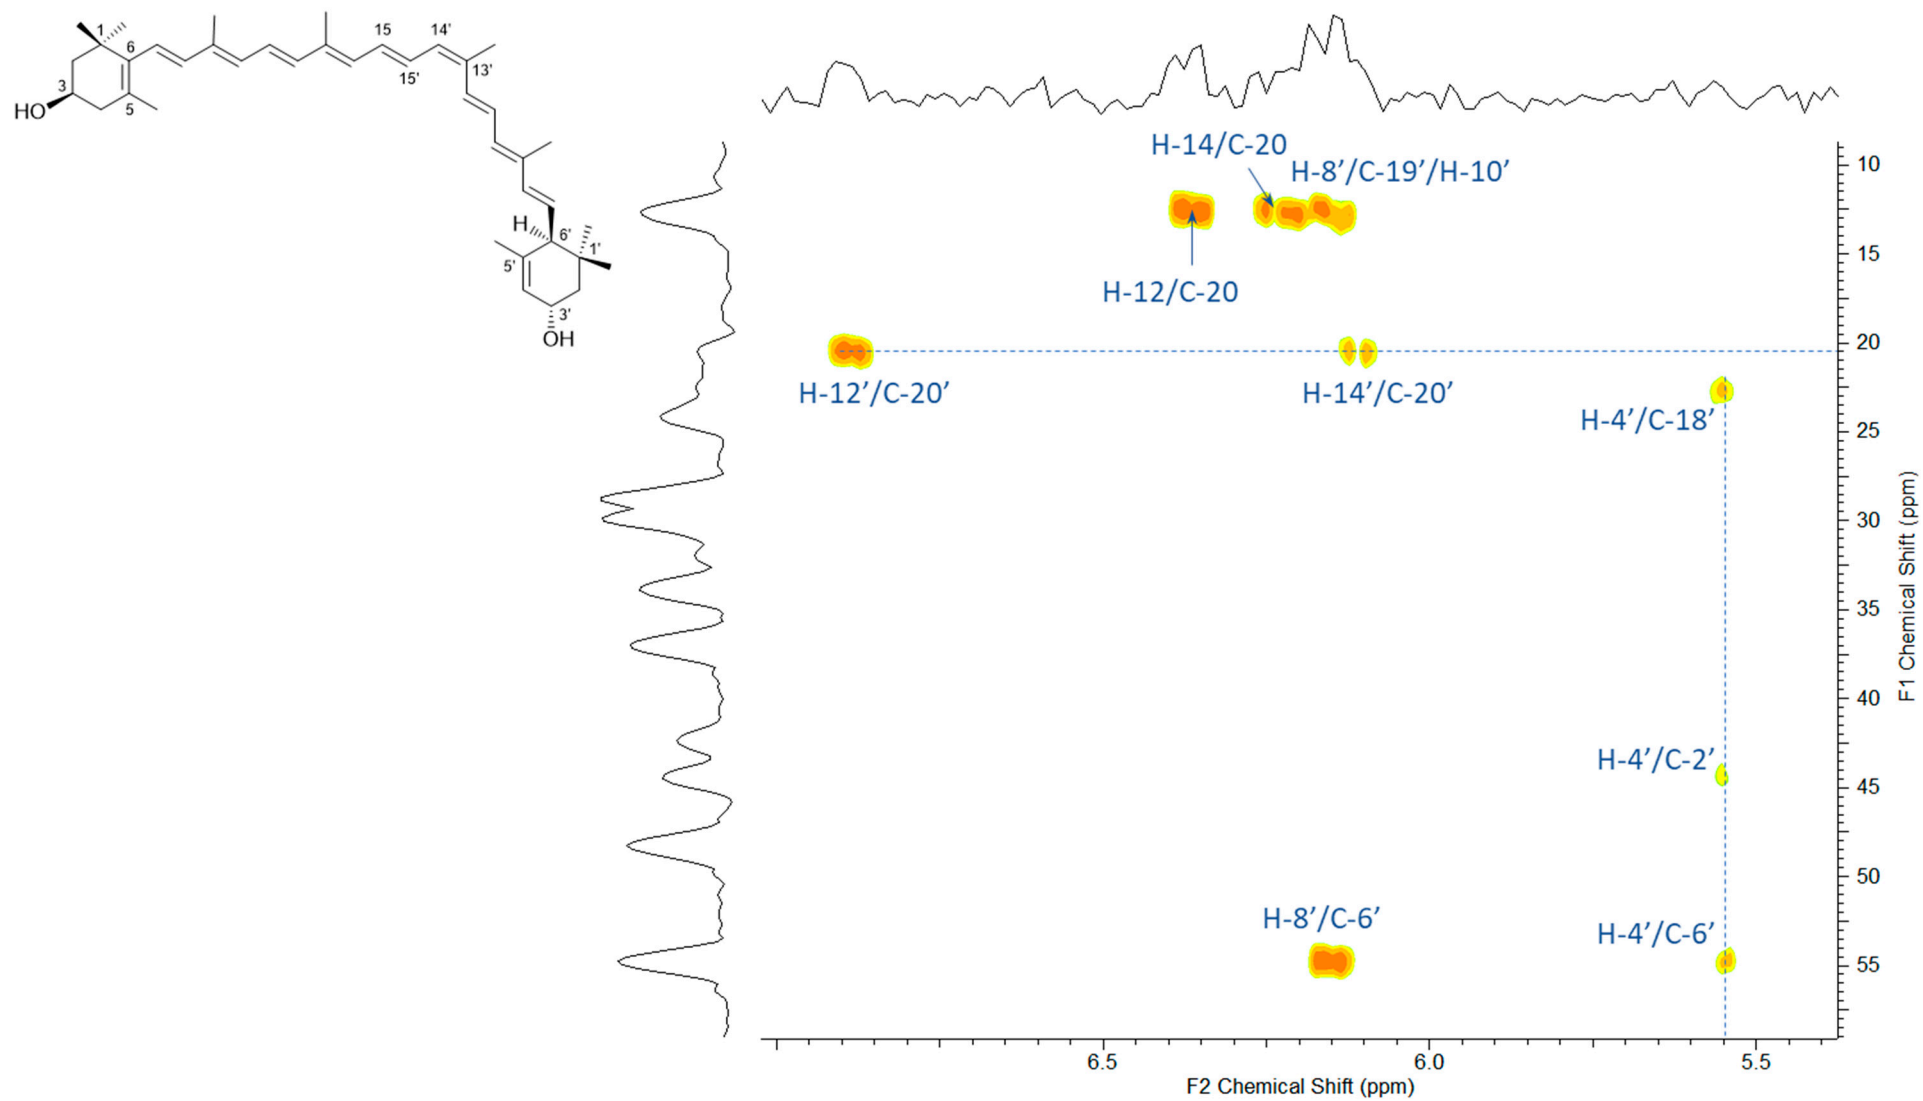

**Figure S2.35.**  $^{13}\text{C}$ - $^1\text{H}$ -HMBC spectrum of (13'Z)-lutein in  $\text{CDCl}_3$ , (500/125 MHz for  $^1\text{H}/^{13}\text{C}$ )

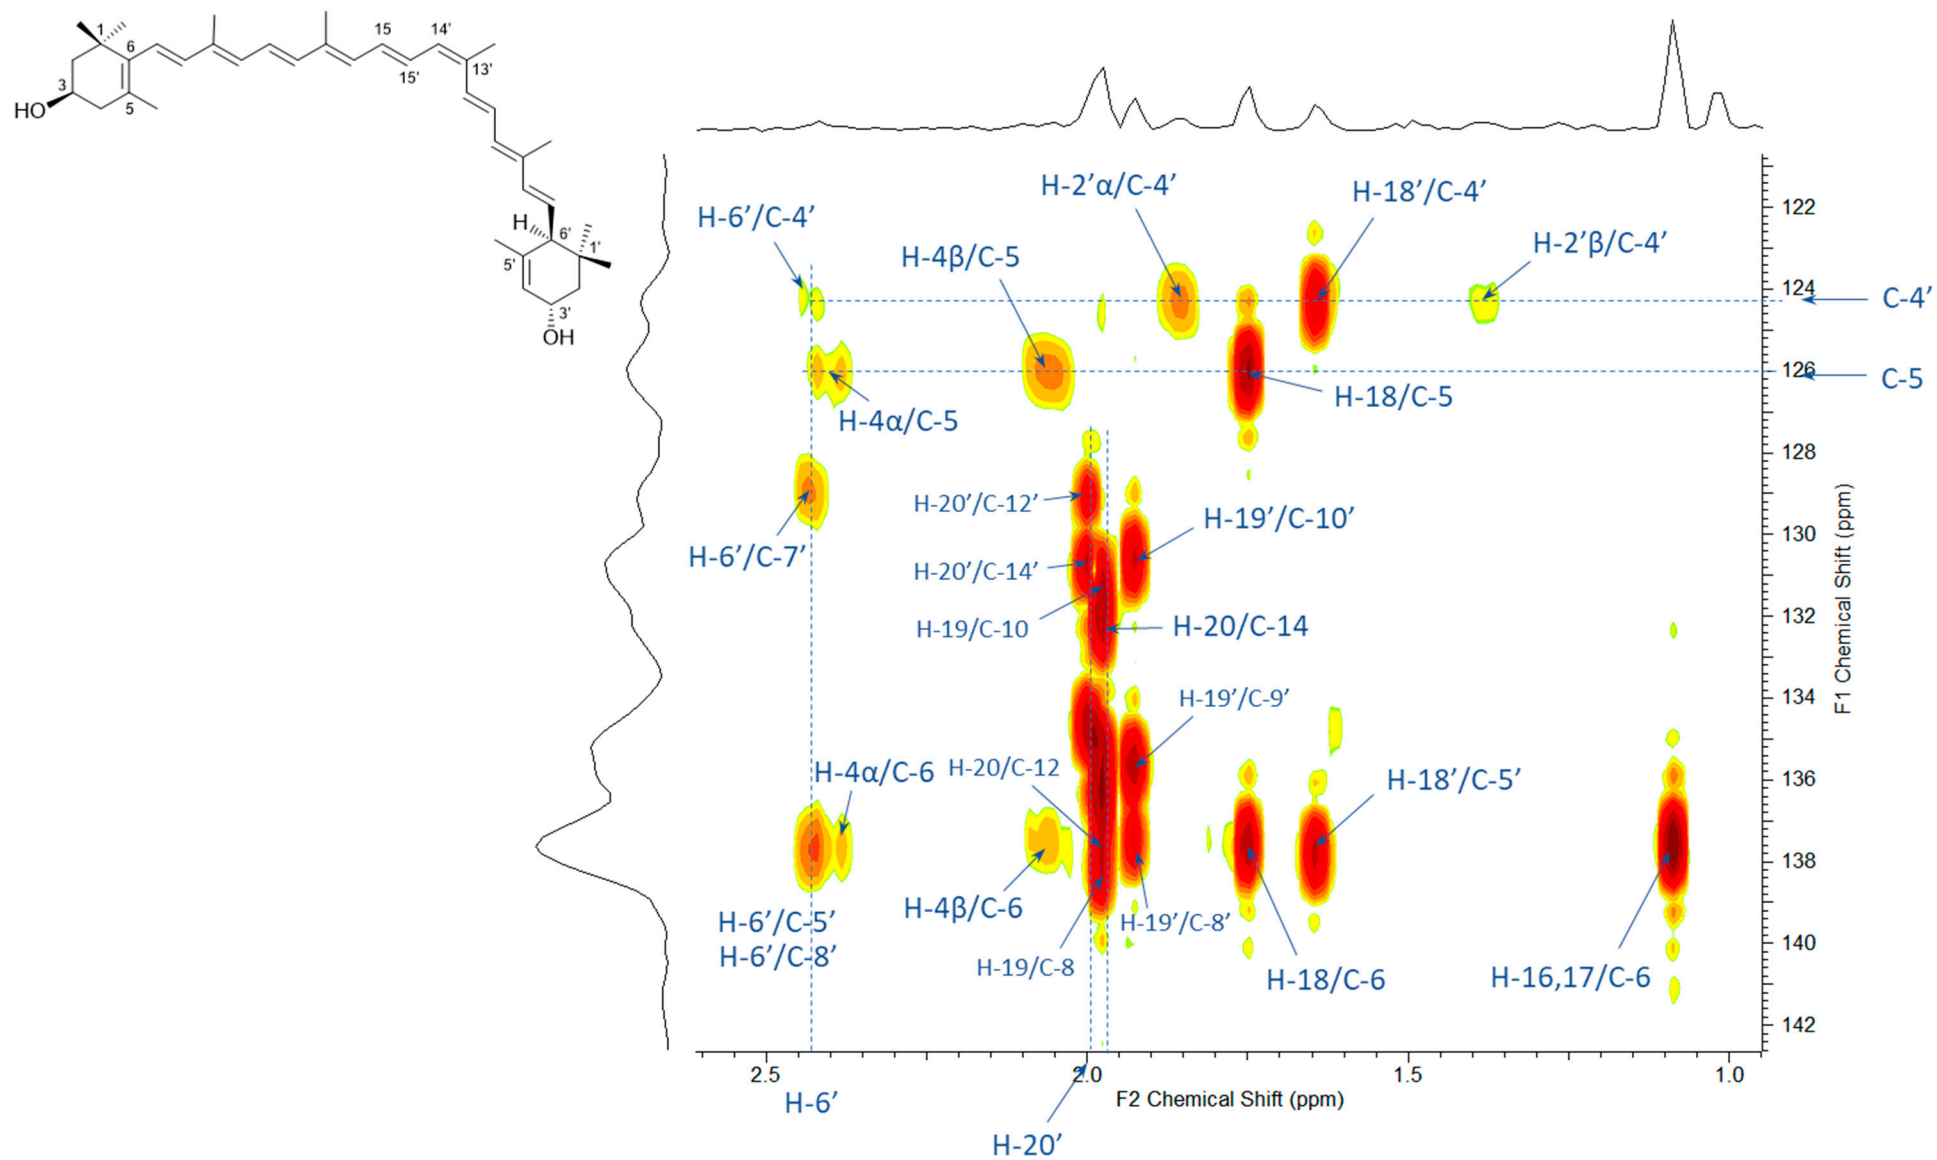

**Figure S2.36.** <sup>13</sup>C-<sup>1</sup>H-HMBC spectrum of (13'Z)-lutein in CDCl<sub>3</sub>, (500/125 MHz for <sup>1</sup>H/<sup>13</sup>C)

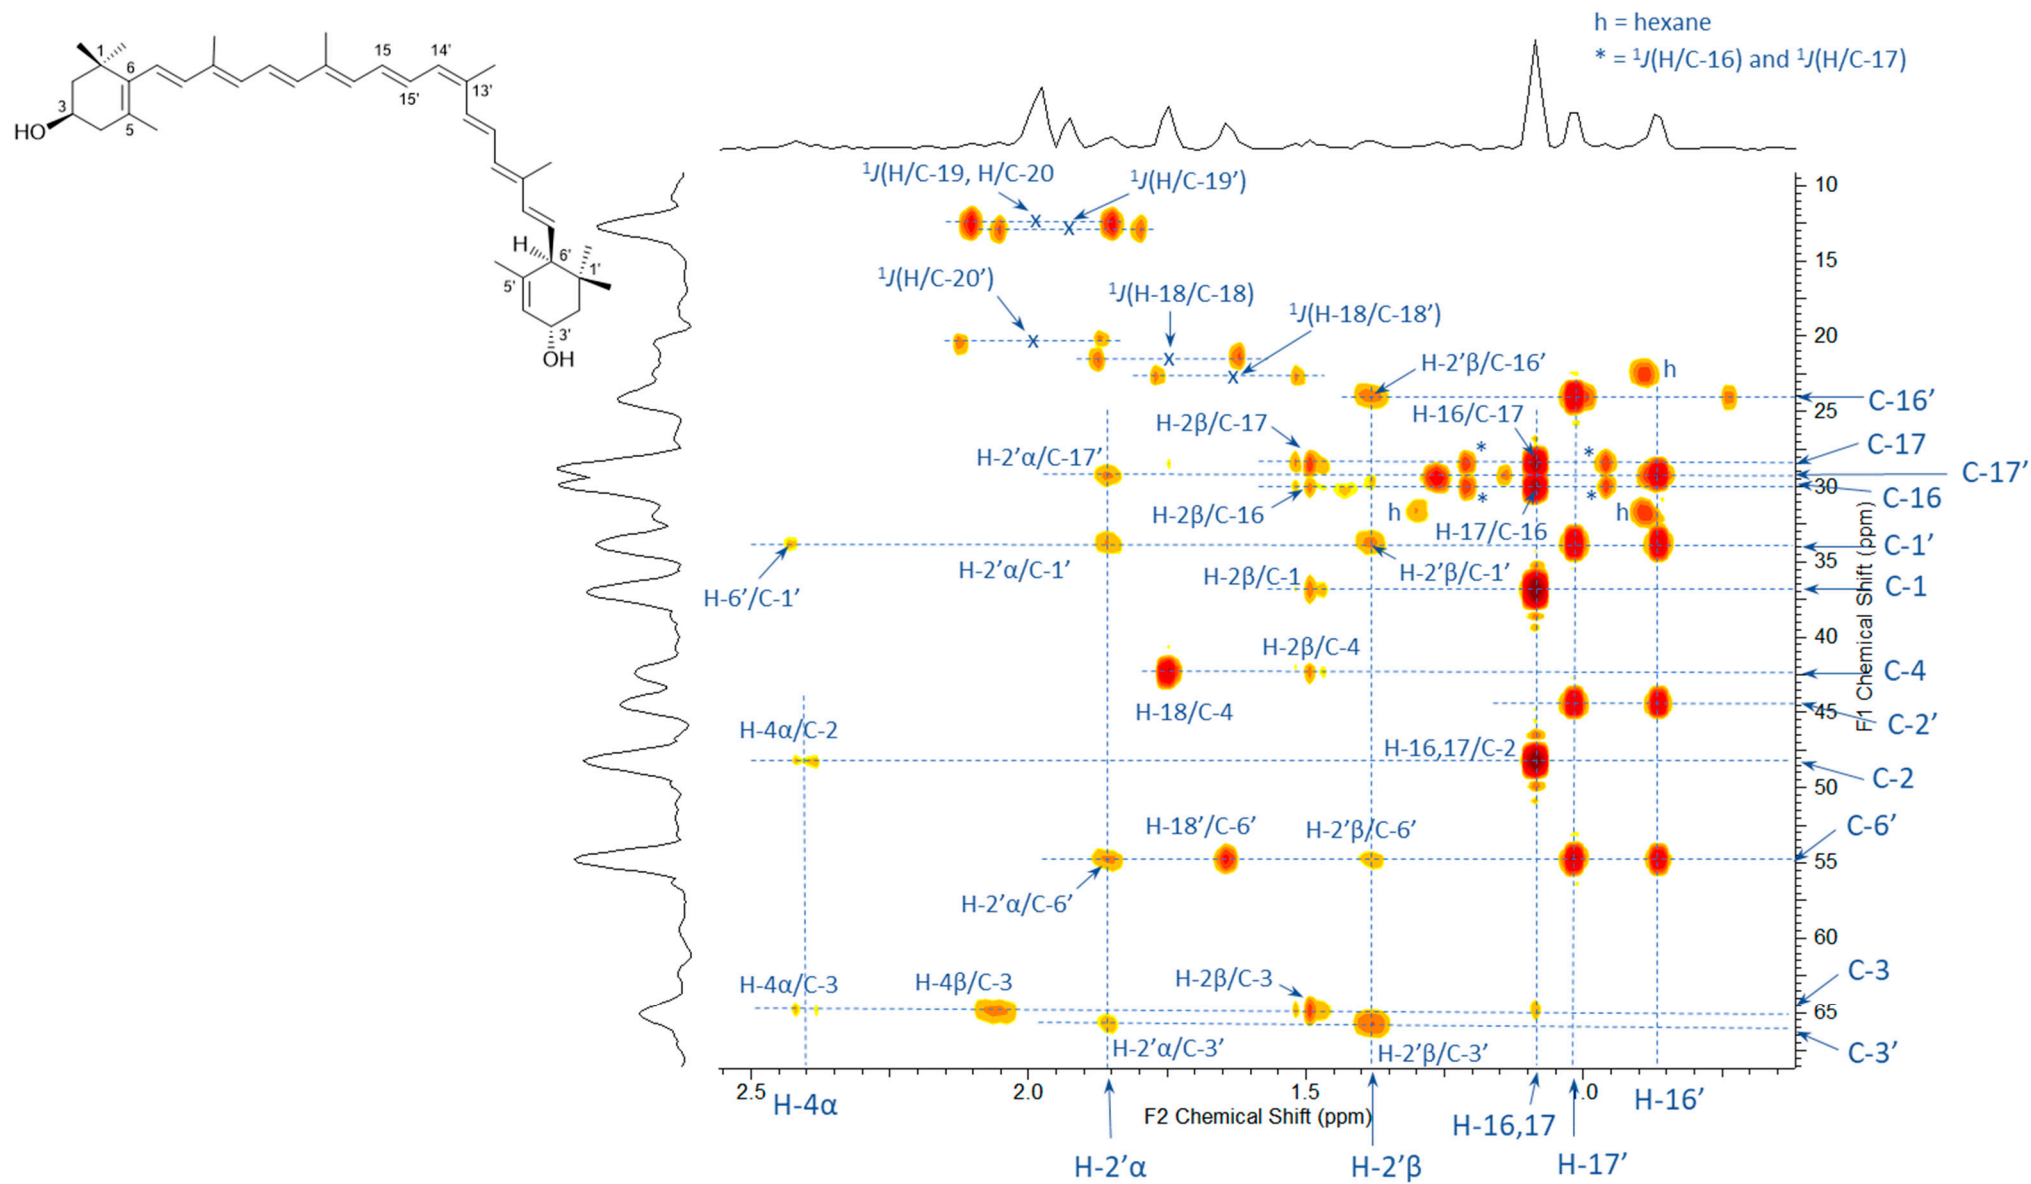

**Figure S2.36.**  $^{13}\text{C}$ - $^1\text{H}$ -HMBC spectrum of (13'Z)-lutein in  $\text{CDCl}_3$ , (500/125 MHz for  $^1\text{H}/^{13}\text{C}$ )

**Figure S3.** UV-vis spectra of lutein isomers, in the HPLC mobile phase

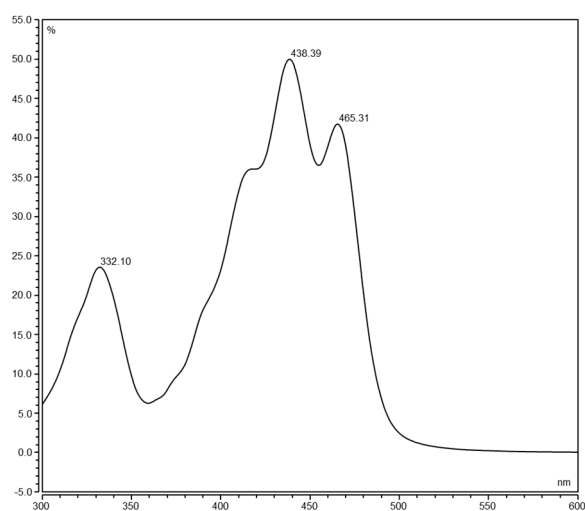

**Figure S3.1.** UV-vis spectrum of (13Z)-lutein in the HPLC mobile phase at 11.9 min. Q: 2.10,  $A_B/A_{II}$ : 47.2%

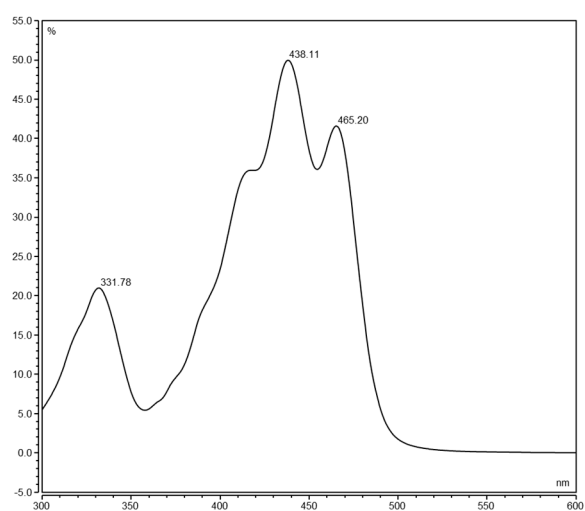

**Figure S3.2.** UV-vis spectrum of (13'Z)-lutein in the HPLC mobile phase at 12.4 min. Q: 2.37,  $A_B/A_{II}$ : 41.7%

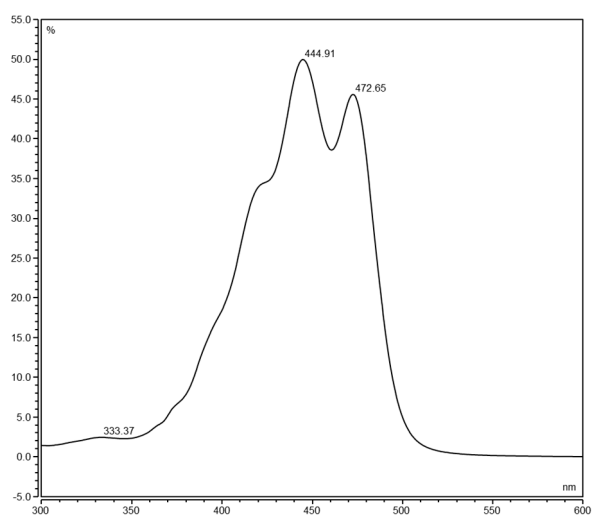

**Figure S3.3.** UV-vis spectrum of all-(*E*)-lutein in the HPLC mobile phase at 13.3 min.

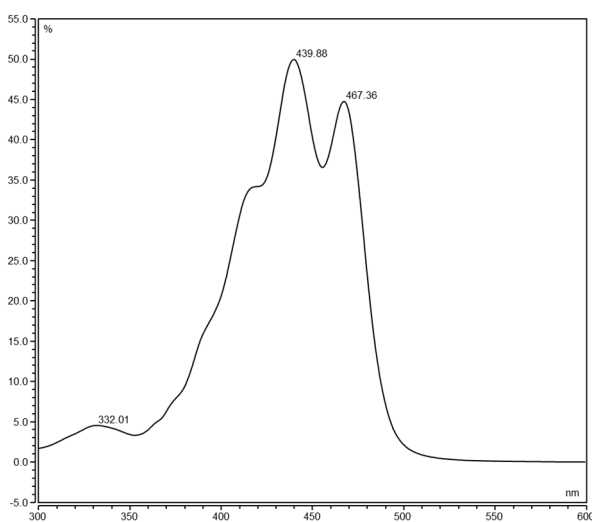

**Figure S3.4.** UV-vis spectrum of (9*Z*)-lutein in the HPLC mobile phase at 16.8 min. Q: 10.80,  $A_B/A_{II}$ : 9.7%

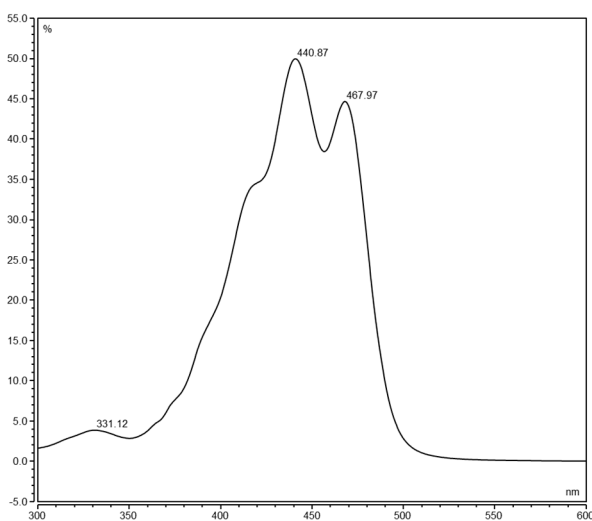

**Figure S3.5.** UV-vis spectrum of (9'*Z*)-lutein in the HPLC mobile phase at 19.6 min. Q: 13.56,  $A_B/A_{II}$ : 8.5%

**Figure S4.** UV-vis and EIC chromatograms of the investigated flowers

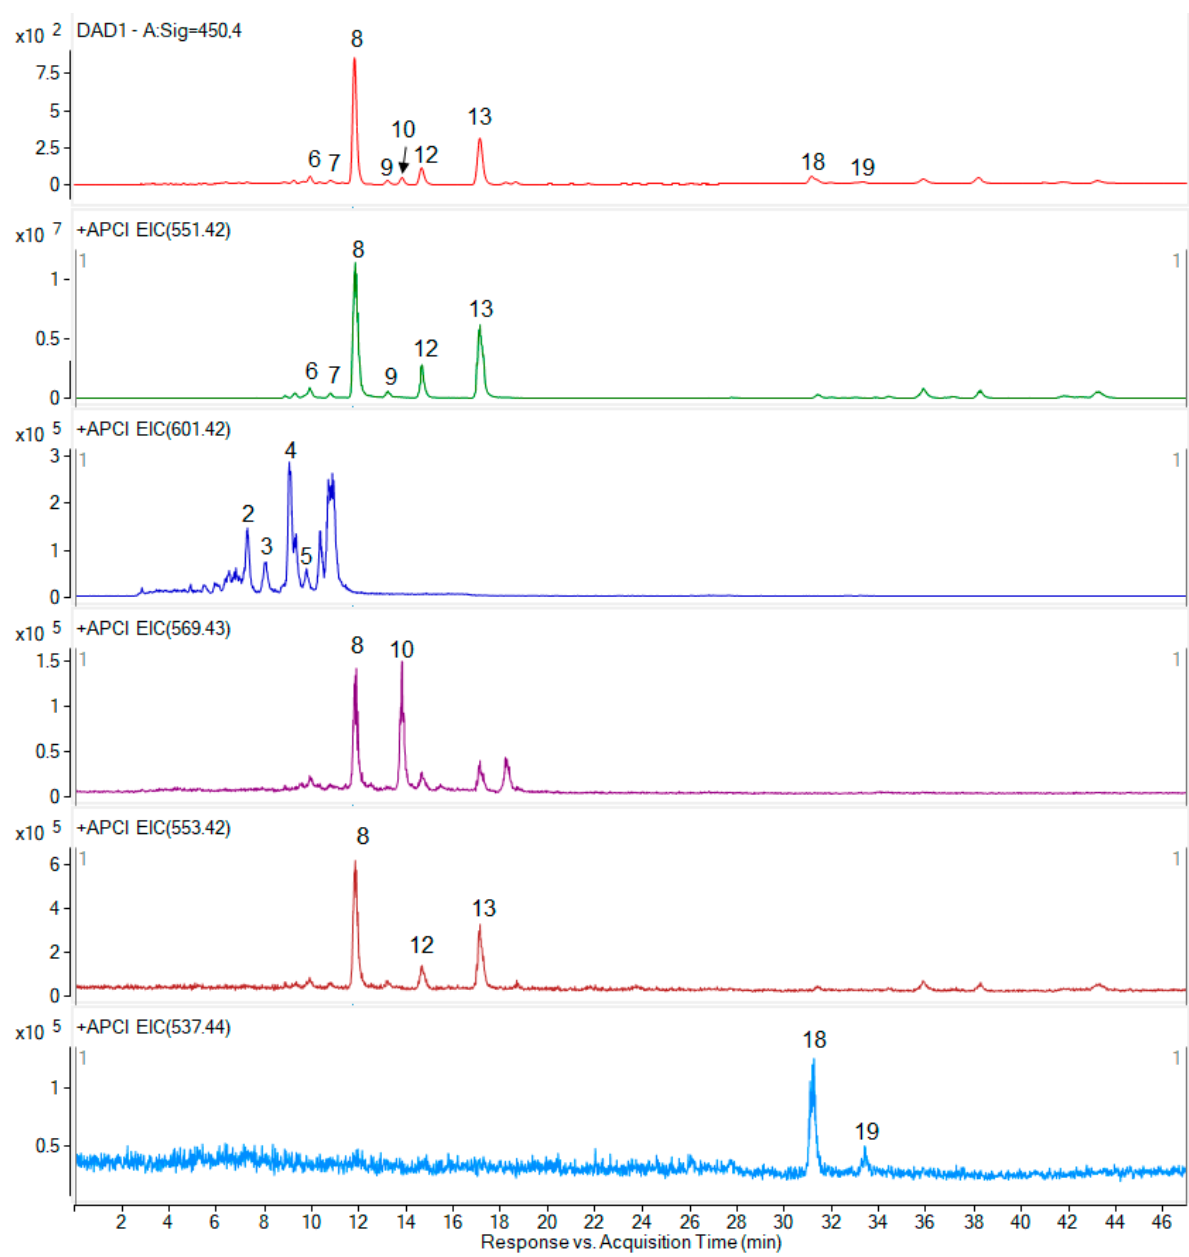

**Figure S4.1.** UV-vis and EIC chromatogram of *Anthemis tinctoria*

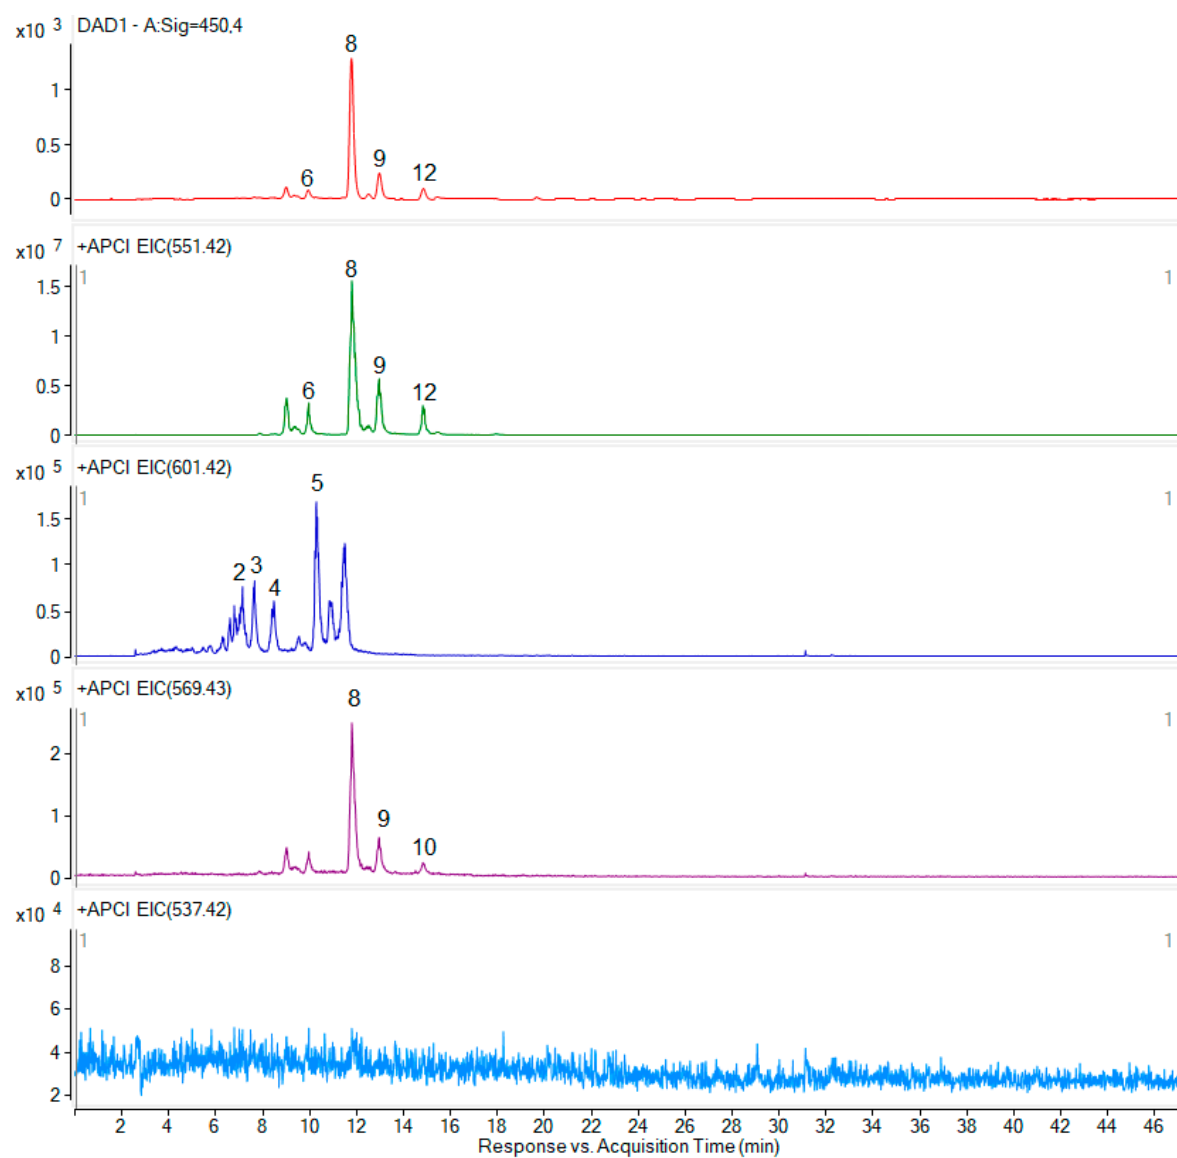

**Figure S4.2.** UV-vis and EIC chromatogram of *Cholicum autumnale*

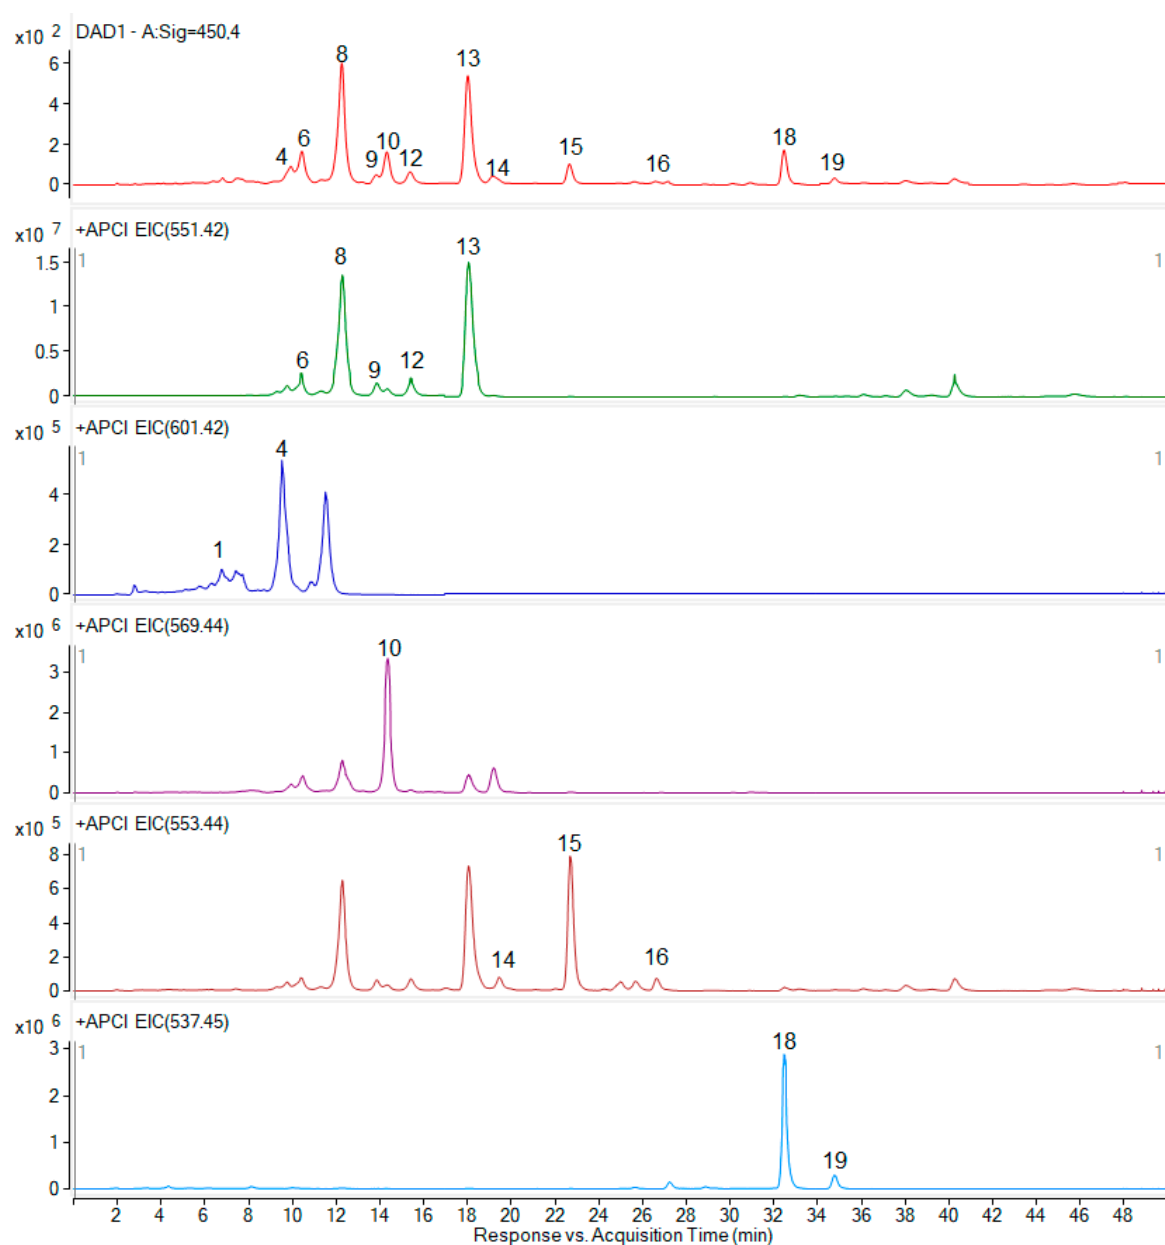

**Figure S4.3.** UV-vis and EIC chromatogram of *Helicrysum italicum*



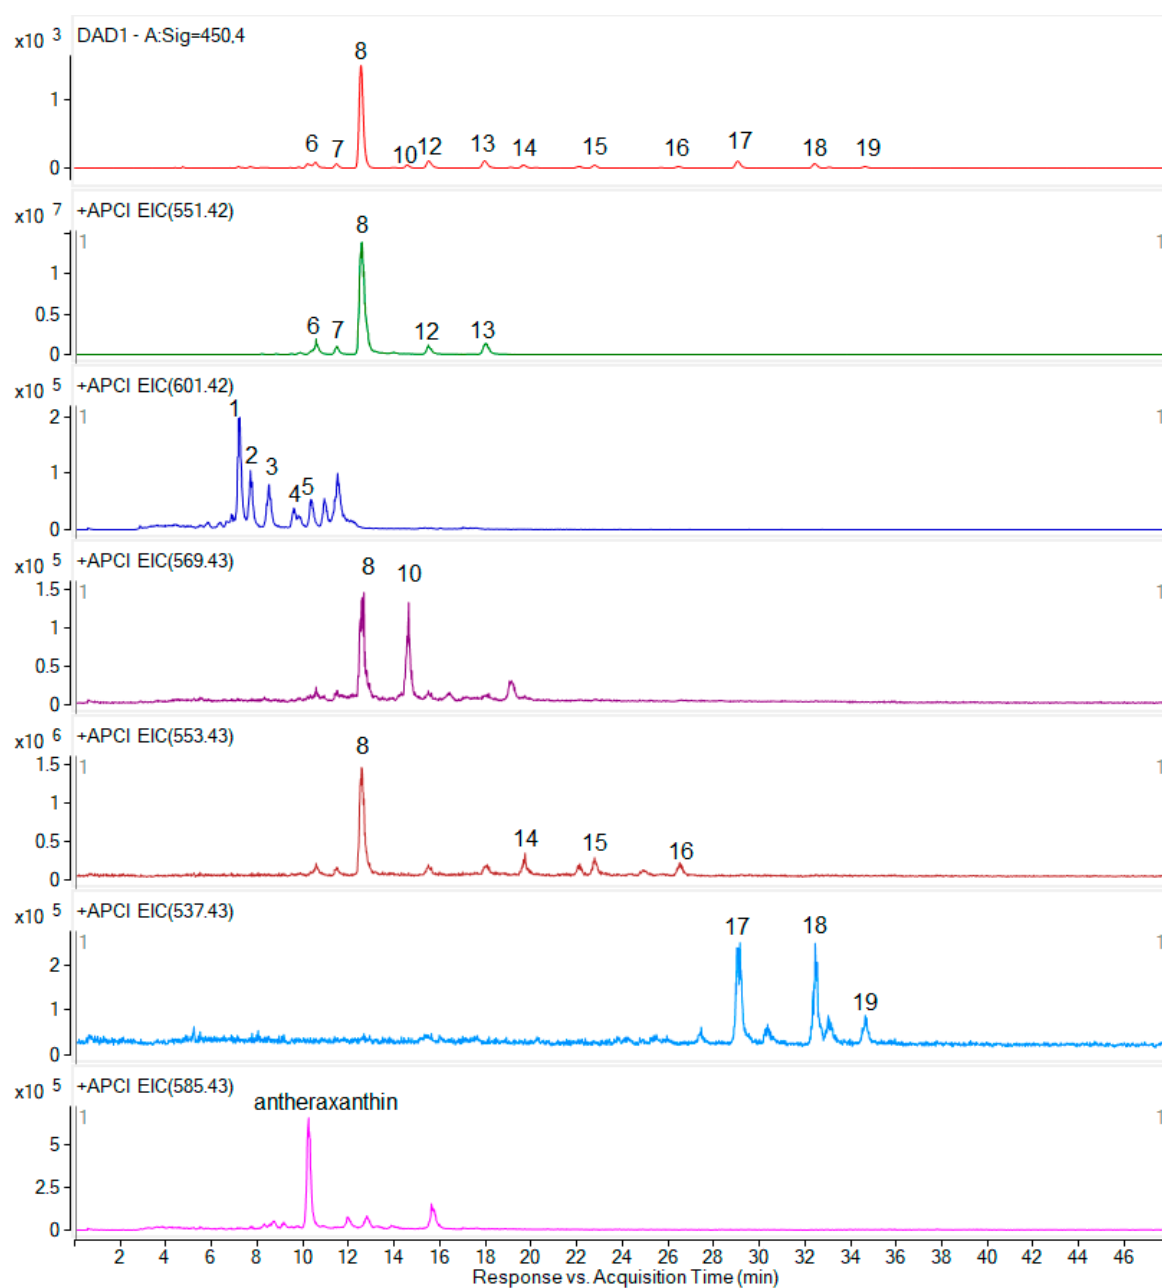

**Figure S4.4.** UV-vis and EIC chromatogram of *Helianthus angustifolius*

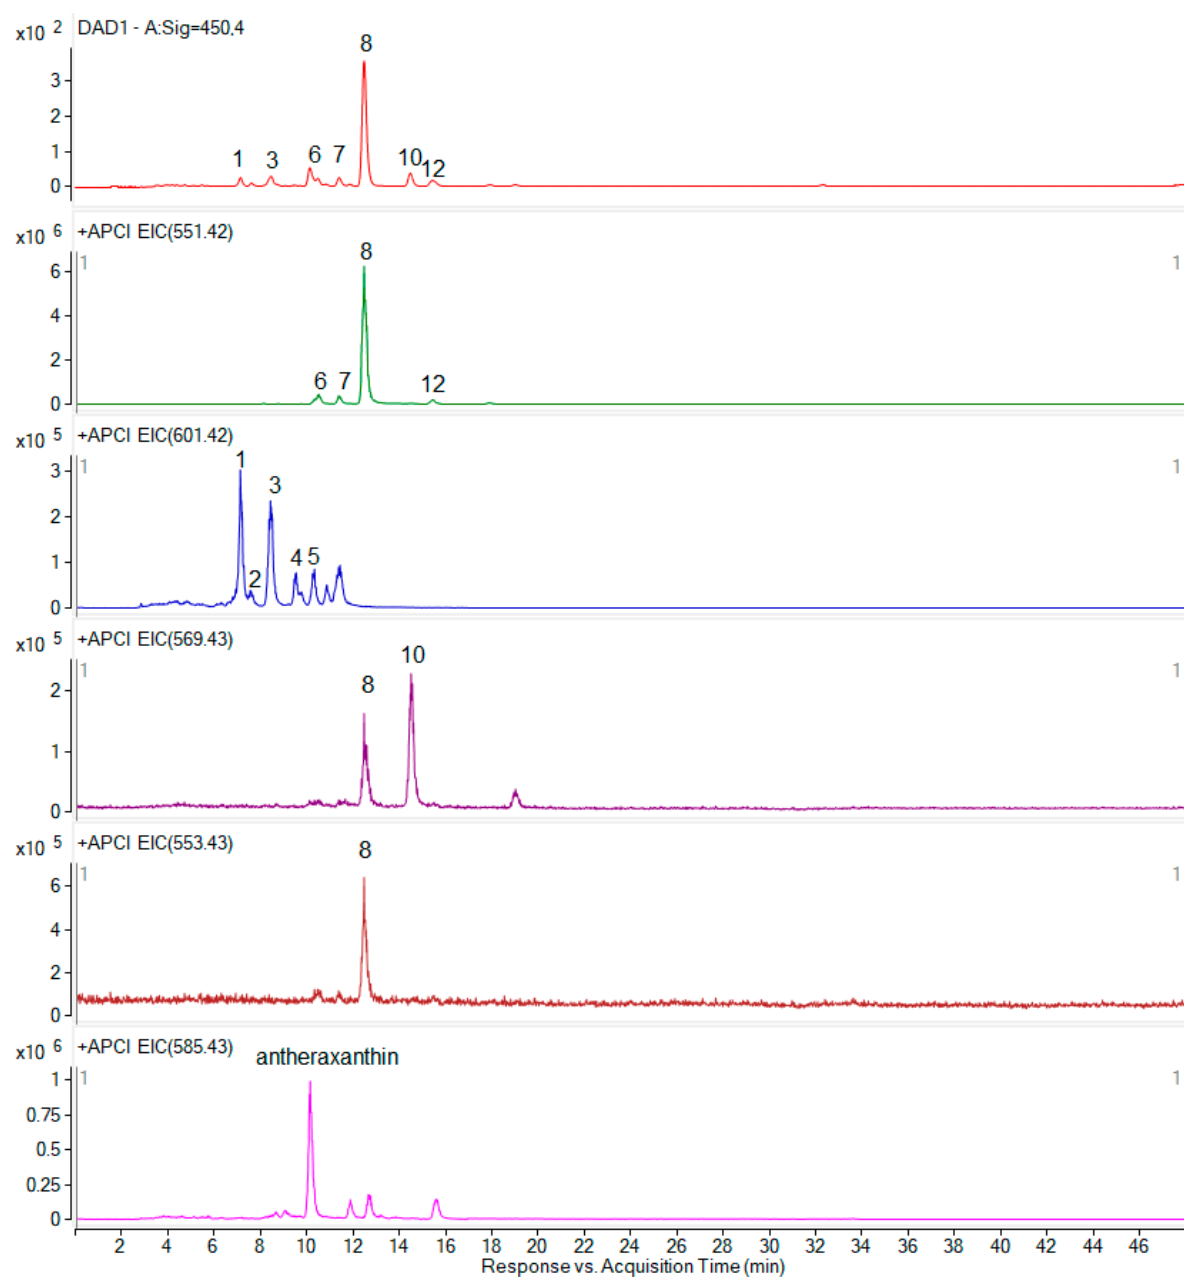

**Figure S4.5.** UV-vis and EIC chromatogram of *Helianthus tuberosus*

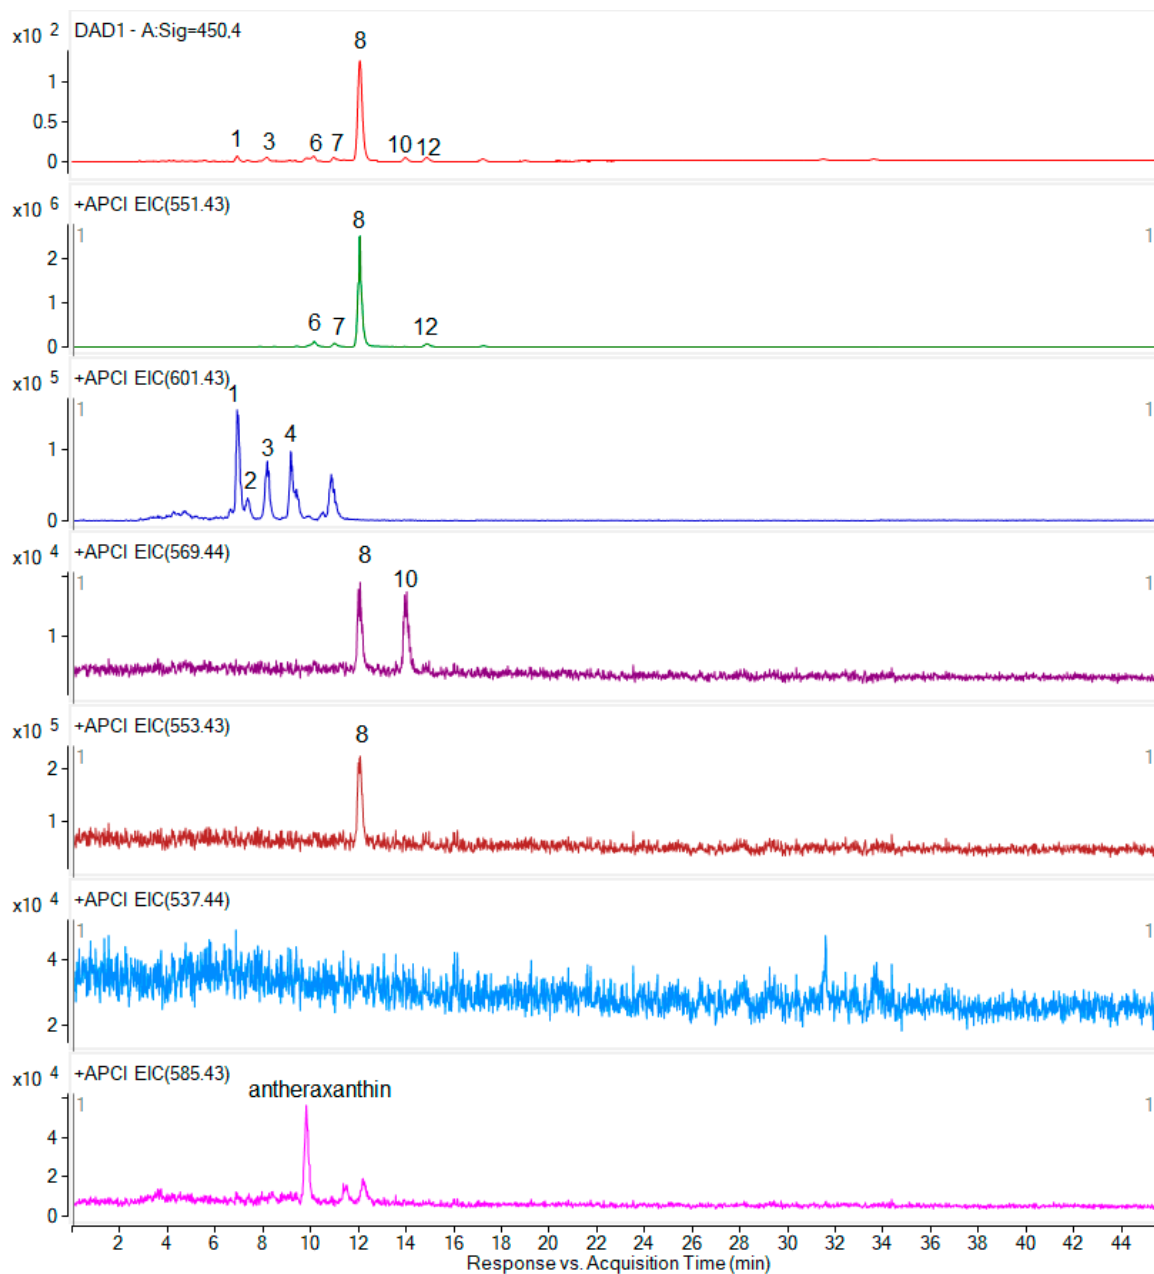

Figure S4.6. UV-vis and EIC chromatogram of *Sternbergia lutea*

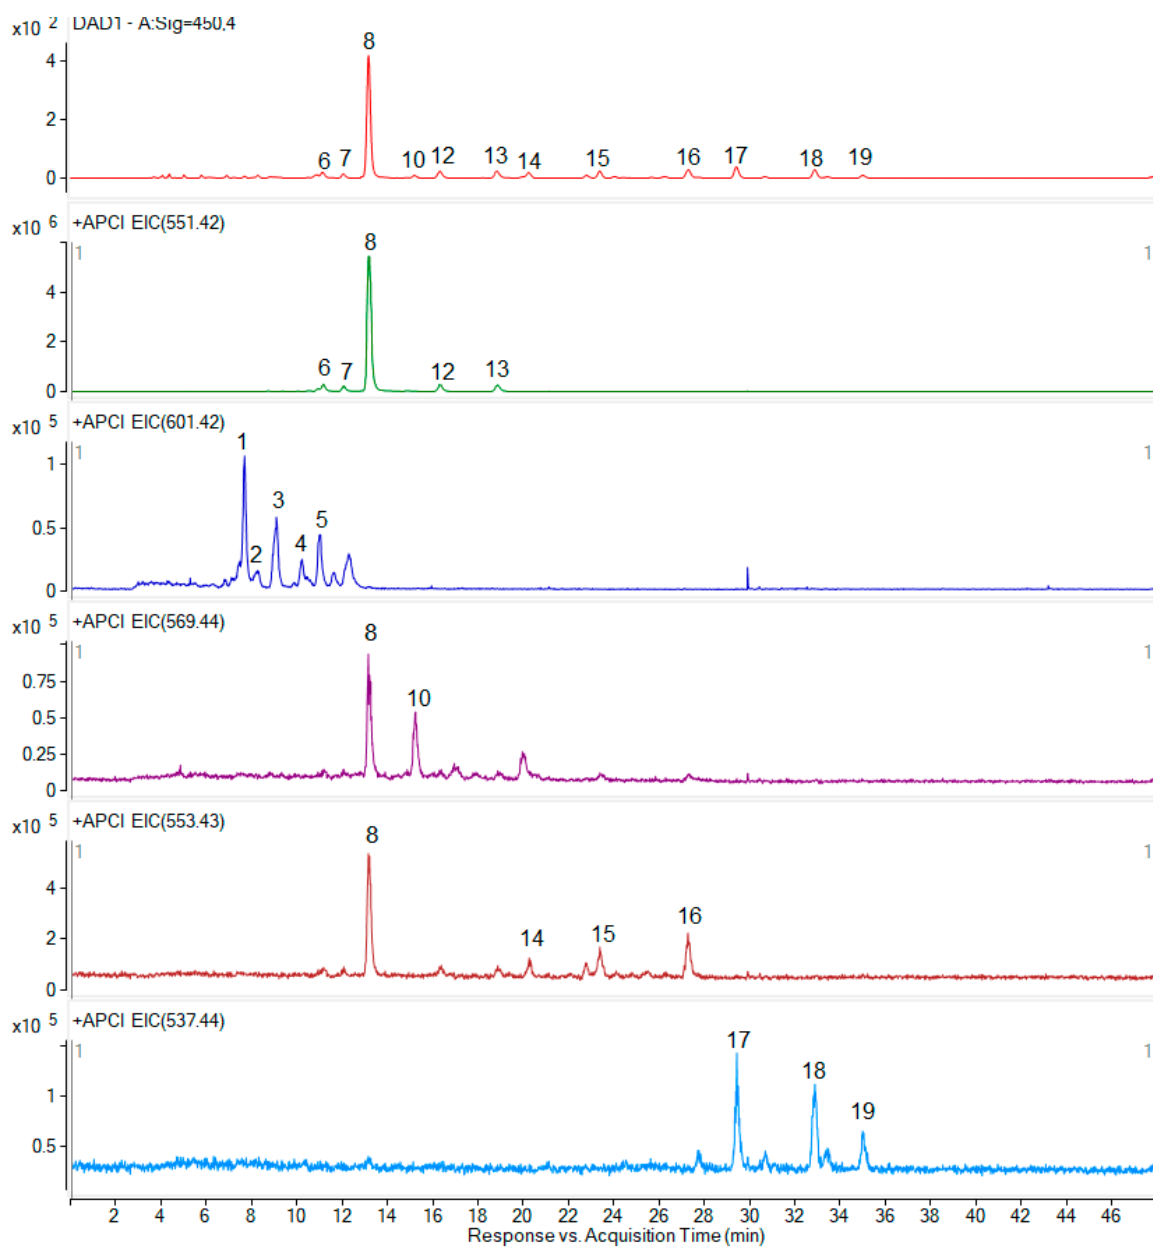

**Figure S4.7.** UV-vis and EIC chromatogram of *Coreopsis pubescens*

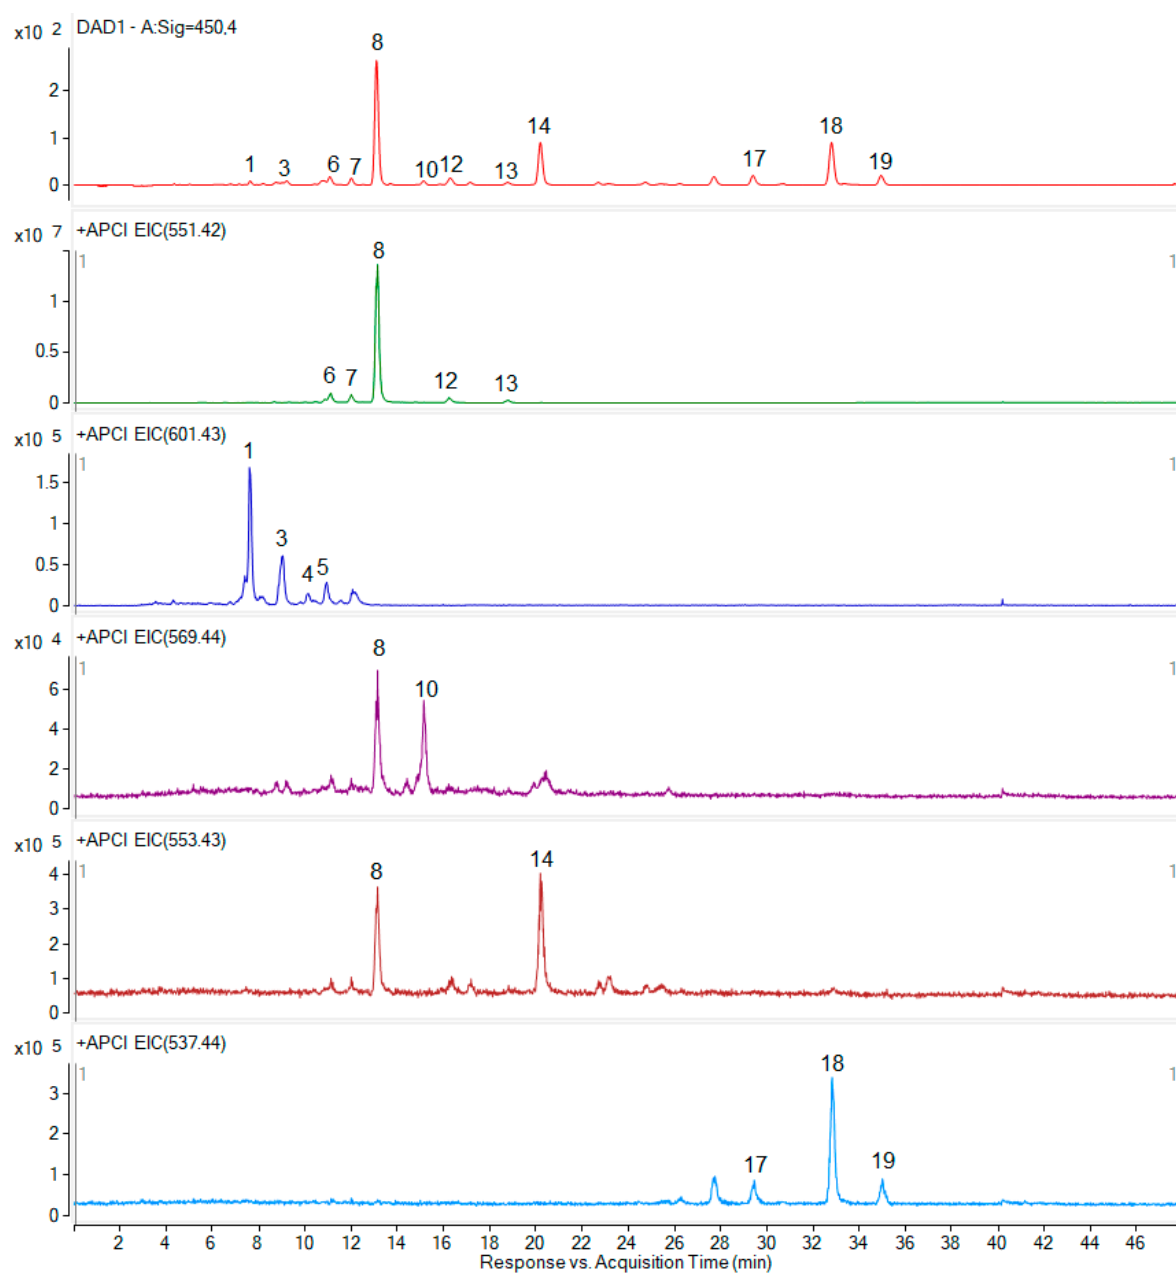

**Figure S4.8.** UV-vis and EIC chromatogram of *Cassia artemisioides*

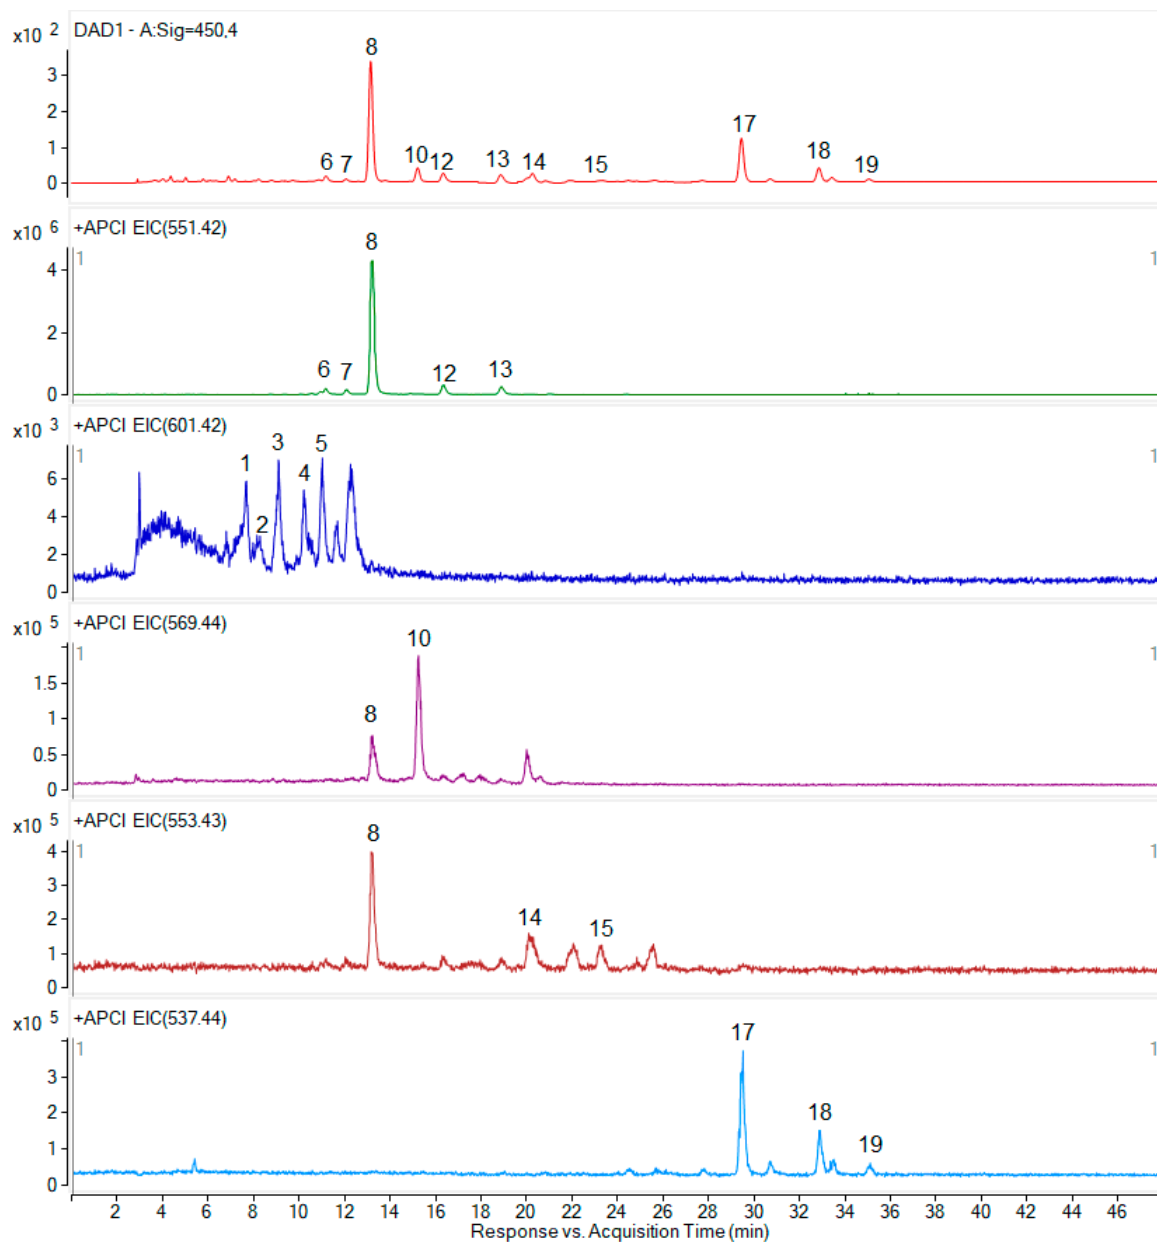

Figure S4.9. UV-vis and EIC chromatogram of *Echinacea paradoxa*
